# Supplementary material for: Sex differences in circadian food anticipatory activity are not altered by individual manipulations of sex hormones or sex chromosome copy number in mice
Source: PLoS One. 2018 Jan 31;13(1):e0191373. doi: 10.1371/journal.pone.0191373 (PMC5792018; doi:10.1371/journal.pone.0191373)
Supplement: S1 Table — (XLSX) [file pone.0191373.s001.xlsx]

## Sheet: Fig 1 CR male-fem
Mouse #	Weight day -7	Weight day 0	Weight day 7	Weight day 14	Weight day 21	Weight day 28
1210	19.7	19.7	20.2	20.8	20.9	21.4
1211	18.6	19.6	20	20.5	21.6	21.7
1212	16	17.2	16	16.2	16.5	16.3
1213	19.2	19.6	17.7	17.5	17.2	17.5
1214	22.8	23.9	24.5	24.5	25.2	26
1215	26.6	26.8	27.2	27.5	29.4	28.7
1216	23.4	23.8	22.1	21.4	21.6	22.2
1217	23.2	24.3	22	21.2	21.4	21.6
1218	17	17.6	18.4	18.9	18.6	19
1219	16.4	16.7	17.5	17.8	18	18.2
1220	18.8	19.2	17.6	17.3	17.2	17.4
1221	18.5	19.6	18.8	18.5	18.6	18.6
1222	23.2	23.6	23.7	24.1	24.8	24.9
1223	23.4	23.1	23	22.8	23.8	24.2
1224	25.8	25.5	23.1	22.5	22.2	22.5
1225	21	20.8	19.7	19.4	19.7	20
	AL Female	17.925	18.4	19.025	19.5	19.775	20.075
	CR male	24	24.35	24.6	24.725	25.8	25.95
	CR female	18.125	18.9	17.525	17.375	17.375	17.45
	CR male	23.35	23.6	21.725	21.125	21.225	21.575
		-7	0	7	14	21	28
	gain female	0.974185	1	1.03397	1.05978	1.07473	1.09103
	gain male	0.985626	1	1.01027	1.0154	1.05955	1.06571
	%loss female	0.958995	1	0.927249	0.919312	0.919312	0.92328
	%loss male	0.989407	1	0.920551	0.895127	0.899364	0.914195
normalized body weight data
	Intact Male	Intact Male	Intact Male	Intact Male	Intact Male	Intact Male	Intact Male		Intact Female	Intact Female	Intact Female	Intact Female	Intact Female	Intact Female	Intact Female	Intact Female
0	1	1	1	1	1	1	1		1	1	1	1	1	1	1	1
7	0.855422	0.886957	0.844358	0.909483	0.851852	0.838174	0.788679		0.873563	0.885417	0.862637	0.860825	0.887641	0.866667	0.910112	0.860215
14	0.795181	0.834783	0.817121	0.849138	0.823045	0.804979	0.69434		0.770115	0.838542	0.807692	0.829897	0.882023	0.85641	0.831461	0.806452
21	0.795181	0.839131	0.817121	0.840517	0.765432	0.813278	0.70566		0.804598	0.796875	0.818681	0.845361	0.904494	0.861538	0.803371	0.811828
28	0.799197	0.821739	0.809338	0.844828	0.794239	0.821577	0.724528		0.913793	0.734375	0.840659	0.85567	0.898876	0.846154	0.853933	0.806452
35	0.869565	0.817121	0.831897	0.794239	0.875519	0.732075			0.840659	0.865979	0.893258	0.866667	0.870787	0.795699
weight in grams
	Intact Males	Intact Males	Intact Males	Intact Males	Intact Males	Intact Males	Intact Males	Intact Males	Intact Males	Intact Females	Intact Females	Intact Females	Intact Females	Intact Females	Intact Females	Intact Females	Intact Females	Intact Females
0	24.9	23	25.7	23.2	24.3	24.1	26.5			17.4	19.2	18.2	19.4	17.8	19.5	17.8	18.6
7	21.3	20.4	21.7	21.1	20.7	20.2	20.9			15.2	17	15.7	16.7	15.8	16.2	16	16
14	19.8	19.2	21	19.7	20	19.4	18.4			15	13.4	16.1	14.7	16.1	15.7	16.7	14.8
21	19.8	19.3	21	19.5	18.6	19.6	18.7			14	15.3	14.9	16.4	16.1	16.8	14.3	15.1
28	19.9	18.9	20.8	19.6	19.3	19.8	19.2			15.9	14.1	15.3	15.6	16	16.5	15.2	15
35	20	21	19.3	19.3	21.1	19.4				15.3	16.8	15.9	16.9	15.5	14.4
normalied FAA 3 hours prior to scheduled mealtime
	Intact Males	Intact Males	Intact Males	Intact Males	Intact Males	Intact Males	Intact Males	Intact Males	Intact females	Intact females	Intact females	Intact females	Intact females	Intact females	Intact females	Intact females
-7	0.042201	0.0461881	0.000127568	0.0292263	0.0534089	0.0310724	0.0439848		0.0642293	0.0347744	0.0376539	0.0375046	0.0481608	0.0383783	0.0762871	0.0607378
0	0.0600209	0.0651622	0.046366	0.0627235	0.101492	0.0468633	0.0554623		0.0799878	0.0241252	0.0689332	0.0722527	0.115159	0.0646444	0.107648	0.0166449
7	0.161038	0.10145	0.12983	0.37727	0.276571	0.260377	0.15362	0.424614	0.106292	0.0625001	0.108542	0.0898898	0.165726	0.127735	0.138232	0.0891746
14	0.353016	0.359143	0.361122	0.41263	0.345785	0.270573	0.34313		0.124568	0.229507	0.10606	0.0896148	0.19764	0.28059	0.00632106	0.0738249
21	0.338633	0.346255	0.22648	0.429549	0.284364	0.230865	0.422102		0.138127	0.202647	0.0221595	0.197825	0.23347	0.260701	0.101066
28	0.47608	0.341397	0.25711	0.518686	0.441295	0.268988	0.417001		0.197166	0.174187	0.24156	0.263964	0.343463	0.353915	0.117402	0.113398
35	0.160643	0.375505	0.167942	0.510584	0.340746	0.406235	0.354763		0.443959	0.147677	0.168295	0.148076	0.275382	0.379076	0.10215	0.213233
FAA in seconds 3 hours prior to scheduled mealtime
	Intact Males	Intact Males	Intact Males	Intact Males	Intact Males	Intact Males	Intact Males	Intact Males									Intact females	Intact females	Intact females	Intact females	Intact females	Intact females	Intact females	Intact females
-7	421.333	791.866	0.8	296.733		522.567	432.7	361.667									1508.9	554.233	563.433	656.5	986.734	338.667	1062.97	697.833
0	578.933	1022.57		766.133	447.967	1302.63	590.734	522.967									1475.93	317.2	1430.53	944.767	3370.3	736.333	1944.17	166.833
7	2352.7	2859.9	597.467	3333.67	2674.87	2767.23	1824.97	3202.56									2040.53	1497.13	2442.1	1189	5169.5	1636.83	2218.9	1095.57
14	3699.07	6598.99	2229.43		3900.07	3278	2563.4	2341.6									3608.93	4434.87	5002.33	2413.43	7952.9	3208.37	70.3333	805.7
21	2068.67	3943.03	1189.13		3516.93	2030.3	2485.53	5530.46									3670.63	3078.93	231.467	3810.47	5052.63	2786.87		1396.43
28	3556.37	4318.3	1404.9		3905	3416.43	2492.1	4539.36									3093.1	3010.1	2798.4	5057.56	6069.03	3883.3	1847.07	1098
35	1662.1	5153.96	1265.2		5859.6	2473.63	3597.13	3248.27									5615.76	2950.37	2208.97	7488.83	5910.63	4118.66	1512.23	2027.6
high activity data (in seconds)
day -7
	Intact Males	Intact Males	Intact Males	Intact Males	Intact Males	Intact Males	Intact Males	Intact Males	Intact Males	Intact Males	Intact Males	Intact Males	Intact Females	Intact Females	Intact Females	Intact Females	Intact Females	Intact Females	Intact Females	Intact Females	Intact Females	Intact Females	Intact Females	Intact Females	Intact females	Intact females	Intact females	Intact females	Intact females	Intact females	Intact females	Intact females	Intact females	Intact females	Intact females	Intact females	Ovariectomized females	Ovariectomized females	Ovariectomized females	Ovariectomized females	Ovariectomized females	Ovariectomized females	Ovariectomized females	Ovariectomized females	Ovariectomized females	Ovariectomized females	Ovariectomized females	Ovariectomized females
7	851.599	1362.6		943.832	1510.73	1101.93							1455.1	1407.9	965.233	1411.6	1172.57	892.832	1216.03	1278.07
8	233.033	236.133		123.8	322.634	499.467							436.467	716.699	42.4333	512.867	409.666	545.4	810.632	574.133
9	34.5333	135.5		125.367	72.5333	1.16667							64.6333	77.4	188.2	232.433	10.6667	15.5333	616.432	23.4
10	73.9667	99.9667		104.733	223.633	227.567							89.3333	103.3	196.833	472.167	38.9	80.7667	0	71.5667
11	253	534.267		78.2333	67.7333	41.4							134.467	170.8	1201.43	896.4	115.8	154.4	39.0667	574.033
12	284.6	654.033		773.2	894.934	382.033							637.933	565.633	1839.17	1514.5	1688.7	930.567	263.5	423
13	529.8	676.3		47.8	1997.93	484.866							2077.17	1130.8	1890.33	1832.57	1653.6	614.6	772.933	1068.33
14	414.533	642.233		964.833	1752.53	1073.63							2037.2	1133.97	1556.37	2069.03	1803.57	104.233	903.3	1190.73
15	543.6	733.1		1032.83	1859.97	1091.5							2144.03	1646.2	1495.43	1515.37	2047.1	411.2	1102.9	1351.6
16	538.933	253.367		1136.53	1450.93	624.3							2165	1680.2	1345.6	1386.63	2053.43	1279.77	1514.77	925.933
17	280.866	47.6333		1105	247.833	306.167							2216.97	1428.9	322.1	538.967	2059.33	814.9	1348.2	384.367
18	180.8	866.766		453.433	451.933	57.9							2149.23	833.232	49.9	453.2	1819.53	302.634	1163.5	15.3667
19	187.033	125.6		120.4	727.7	854.566							2196.93	4.1	51.1333	1201.33	1737.17	46.9333	629.132	524.6
20	528.2	300.967		731.1	195.133	267.199							1564.2	49.2667	356.367	645.6	300.867	436.733	32.6	538.433
21	265.066	1052.07		313.733	558.367	24.2667							320	896.467	877.699	36.6333	670.433	462.867	49.3333	91.8333
22	26.8	366.567		106.8	134.3	372.433							216.233	870.333	66.8667	874.233	186.667	98.5333	34.4	374.533
23	269.2	137.567		310.133	28.4	62.6667							733.1	860.199	890.7	369.667	369.467	208.467	74.2333	52.7667
24	133.333	43.1333		18.0333	261.633	258.8							176.433	636.833	524.533	58.4333	449	385.467	905.8	280.8
1	400.633	986.565		580.767	40.0667	69.8							326.067	27.6	43.4333	313.567	368.4	7.73333	721.466	620.1
2	3	601.265		4.3	495.967	59.2							681.1	527.933	412.634	438.6	448.734	454	640.665	423.933
3	237.833	0.6		186.833	197.933	0							161.9	615.966	83.6333	74.2333	97.9667	238.2	31.9	3.9
4	0	266.167		522.366	87.0333	125.6							1139.5	52.7667	14.2	0.966667	986.734	13.4333	5.2	351.1
5	0	1.36667		0.2	319.7	232.967							229.033	311.633	411.033	450.567	0	325.233	879.733	342.7
6	0.8	29.2			25.9667	3.1							140.367	189.833	138.2	204.967			178.033	4.03333
day 28
	Intact Males	Intact Males	Intact Males	Intact Males	Intact Males	Intact Males	Intact Males	Intact Males	Intact Males	Intact Males	Intact Males	Intact Males	Intact Females	Intact Females	Intact Females	Intact Females	Intact Females	Intact Females	Intact Females	Intact Females	Intact Females	Intact Females	Intact Females	Intact Females	Intact Females	Intact Females	Intact Females	Intact Females	Intact Females	Intact Females	Intact Females	Intact Females	Intact Females	Intact Females	Intact Females	Intact Females
7	285.767	284.7	303.333		363.866	408.667	845.567	691.1					623.032	777.999	636.899	995.999	1028.07	769.766	1518.66	707.133					623.032	777.999	636.899	995.999	1028.07	769.766	1518.66	707.133
8	641.3	1138.4	315.033		190.467	363.433	553.467	494.967					581.433	935.399	447.633	1005.4	815.766	402.7	1204.93	580.167					581.433	935.399	447.633	1005.4	815.766	402.7	1204.93	580.167
9	927.033	1566.1	520.8		515.8	442.567	606.7	1051.37					1064.13	736.166	78.4	720.3	1167.6	1063.17	1133.03	508.767					1064.13	736.166	78.4	720.3	1167.6	1063.17	1133.03	508.767
10	299.133	1358.83	332.033		26.9333	3.63333	142.8	539.6					752.333	12.8667	171.767	6.73333	810.566	873.133	1262.97	412.4					752.333	12.8667	171.767	6.73333	810.566	873.133	1262.97	412.4
11	2	204.5	8.93333		6.56667	61.8333	5.9	20.5667					8.5	672.567	545.6	542.433	4.73333	37.0667	646.266	7.2					8.5	672.567	545.6	542.433	4.73333	37.0667	646.266	7.2
12	68.4333	214	492.4		13.9	308.867	260.367	23.8					49.4333	403.467	212.6	998.6	799.3	29.6667	60.7667	190.467					49.4333	403.467	212.6	998.6	799.3	29.6667	60.7667	190.467
13	226.267	473.233	267.667		149.367	336.833	587.8	816.366					975.533	1205.17	882.333	532.5	1088.53	576.767	880.2	475.967					975.533	1205.17	882.333	532.5	1088.53	576.767	880.2	475.967
14	541	718.433	151.433		252.1	309.267	515.567	498.233					1846.43	1637.4	1212.87	1730.43	90.5333	778.2	1231.57	942.933					1846.43	1637.4	1212.87	1730.43	90.5333	778.2	1231.57	942.933
15	123.967	0.266667	147.933		161.3	195.533	247.967	269.1					1154.1	1045.17	495.833	1567.1	1017.9	161.567	774.1	969.034					1154.1	1045.17	495.833	1567.1	1017.9	161.567	774.1	969.034
16	24.3333	518.867	307.633		127.167	99.5	254.434	0.2					0	0	266.867	1178.73	1072.8	84.9333	1264.53	14.1					0	0	266.867	1178.73	1072.8	84.9333	1264.53	14.1
17	5.5	0	8.83333		201.9	258.567	595.467	378.533					58.8333	1353.57	822.9	0	0	203.7	178.5	498					58.8333	1353.57	822.9	0	0	203.7	178.5	498
18	238.433	455.933	249.833		0	59.4333	6.1	0					836.699	1788.46	0.466667	0.5	1119.47	196.933	0	5.2					836.699	1788.46	0.466667	0.5	1119.47	196.933	0	5.2
19	0	0	185.9		454.067	174.7	496.233	517.867					0	481.634	833.3	1141.73	339.233	160.767	841.9	200.067					0	481.634	833.3	1141.73	339.233	160.767	841.9	200.067
20	298.867	56.5667	0		0	18.6	127.233	0					531.166	0	5.5	1086.83	0	821.433	1659.9	761.134					531.166	0	5.5	1086.83	0	821.433	1659.9	761.134
21	0	609.7	94.3667		218.467	716.767	323.167	316.667					8.6	22.0333	0	794.899	865.966	0	202.333	0.7					8.6	22.0333	0	794.899	865.966	0	202.333	0.7
22	0	0	88.0667		0	161.633	0.5	1					0	1055.83	0	0.4	0	477.567	0	639.033					0	1055.83	0	0.4	0	477.567	0	639.033
23	212.467	0.2	251.2		3.5	175.3	486.367	281.1					490.166	0	0	844.533	0	3.36667	0	61.1					490.166	0	0	844.533	0	3.36667	0	61.1
24	0	129.633	0		167.1	0	54.3333	0					0	0	0	53.9333	142.567	26.9667	292.367	377.767					0	0	0	53.9333	142.567	26.9667	292.367	377.767
1	13.2	27.7333	3.43333		0	2.4	376.367	3					43.2	5.8	969.499	0	903.666	380.567	728.899	206.267					43.2	5.8	969.499	0	903.666	380.567	728.899	206.267
2	0	27.6667	38		33.9333	96.9667	9.1	50.5333					1859.5	280.2	1195.03	901.433	9.73333	31.9333	1.36667	0					1859.5	280.2	1195.03	901.433	9.73333	31.9333	1.36667	0
3	6.03333	545.833	292.467		737.2	130.9	277.2	392.367					1711.6	1857	8.8	0	324.633	8.9	3.5	1027.27					1711.6	1857	8.8	0	324.633	8.9	3.5	1027.27
4	482.067	90.7	184.667		592.7	462.633	880.234	1722.43					145.4	708.033	0	1340.17	1859.33	977.4	396.833	158.633					145.4	708.033	0	1340.17	1859.33	977.4	396.833	158.633
5	1308.57	1832.4	374.167		1255.37	1383.57	405.467	1641.13					401.433	0.9	1241.6	2228.03	2227.9	1329.67	1424.96	0					401.433	0.9	1241.6	2228.03	2227.9	1329.67	1424.96	0
6	1765.73	2395.2	846.067		2056.93	1570.23	1206.4	1175.8					2546.27	2301.16	1556.8	1489.37	1981.8	1576.23	25.2667	939.367					2546.27	2301.16	1556.8	1489.37	1981.8	1576.23	25.2667	939.367
day 35
	Intact males	Intact males	Intact males	Intact males	Intact males	Intact males	Intact males	Intact males	Intact males	Intact males	Intact males	Intact males													Intact females	Intact females	Intact females	Intact females	Intact females	Intact females	Intact females	Intact females	Intact females	Intact females	Intact females	Intact females
7	853	511.166	596.767		377.666	536.133	605.8	715.199																	1030.37	1314.6	1310.1	1929.8	1073.13	776.066	885.133	674.533
8	1201.7	502.8	493		456.167	308.267	446.066	558.333																	681.6	1134.93	1111.73	1720.13	967.2	536.7	1076.83	574.233
9	823.133	1379.43	816.566		1129.6	625.366	96.6333	446.266																	396.2	1166.77	468.166	1510.5	896.2	609.133	917.633	459.033
10	1109.27	1423.2	788.833		98.7	366.1	48.5	198.3																	199.167	190.5	230.3	1399.27	827.267	105.933	589.933	140.633
11	516.4	883.4	58.6333		15.0333	203.333	110.5	6.2																	40.9	1543.23	318	1574.7	155.867	2.53333	7.26667	84.2
12	35.4333	30.1333	8.23333		157.833	53.7666	191.367	50.5333																	165.533	1124.6	105.6	341.3	1840.4	713.133	774.1	438.1
13	36.3667	919.165	484.3		135.533	541.267	184.067	871.167																	814.367	513.9	1171.97	955.334	1769.8	4.13333	1246.03	464.733
14	392.433	369.634	94.8		355.8	438.3	383.634	514.267																	1507.1	1189.73	756.933	2214.8	1620.67	813.933	1499.17	688.867
15	171.6	437.933	303.133		180.967	28.6667	343.467	52.3667																	405.933	2175.83	0	2075.3	1878.37	431.833	1474.67	24.1333
16	1127.46	39	197.3		206	291.967	122.733	509.034																	385	2030.03	251.633	2223.1	1232.53	11.6667	560.167	6.23333
17	891.5	419.167	0		323.067	32.2	366.5	1																	196.8	860.334	846.4	2448.9	0.8	827.833	0.366667	874.933
18	4.3	98.8	644.866		278.233	595.033	0	571.8																	110.4	1.2	38.2333	2334.5	683.5	419.1	883.467	24.5
19	235.967	451.6	0.4		367.6	62.5333	387.167	0																	161.967	7.86667	0	2217.36	1039.33	462.467	1177.37	776.233
20	358.6	421.333	483.367		0	157.1	21.7333	300.133																	0	1424.87	1423.7	2225.43	0	317.8	4.63333	286.333
21	0.966667	0	59.8		363.8	257.033	394.9	238.5																	0	64.3333	553.1	2205.66	473.367	0	594.9	454.067
22	378.034	169.3	559.234		144.167	197.367	0	324.733																	0	0	0	2261.26	429.334	405	599.867	309.3
23	1.8	0	0		235.367	54	475.367	232.633																	665.1	213.333	882.133	2460.16	0	0	4.9	175.133
24	138.5	139.6	383.967		30.2333	0.4	359.3	24.4333																	59.2333	1419.63	219.8	2784.33	516.7	141.967	484.3	691.299
1	0.333333	3.4	10.0667		4.03333	8.76667	16.3667	14.6667																	208.567	0	12.1	2693.76	139.8	159.5	57.6	1
2	19.5	204.433	8.76667		16.4333	2.03333	444.733	63.8																	0	0	136.033	2779.53	0	5.2	0	326.533
3	388.134	167.967	276.333		740.433	26.2	258.833	214.533																	5.3	652.4	1080.67	2730.37	8.5	2.4	453.534	7.2
4	15.2333	1122.33	165.233		1948.03	345.167	95.9	70.6667																	1050.93	0	1.8	2767.6	642.734	1124.27	0.6	148.7
5	326.767	1811.2	401.334		2193.53	819.933	1815.8	1539.93																	2186	432.367	625.967	2775.26	2679.73	1568.8	48.1667	837.2
6	1320.1	2220.43	698.634		1718.03	1308.53	1685.43	1637.67																	2378.83	2518	1581.2	1945.96	2588.16	1425.6	1463.47	1041.7
normalized
day -7
	Intact males	Intact males	Intact males	Intact males	Intact males	Intact males	Intact males	Intact males	Intact males	Intact males	Intact males	Intact males	Castrated males	Castrated males	Castrated males	Castrated males	Castrated males	Castrated males	Castrated males	Castrated males	Castrated males	Castrated males	Castrated males	Castrated males	Intact females	Intact females	Intact females	Intact females	Intact females	Intact females	Intact females	Intact females	Intact females	Intact females	Intact females	Intact females	Ovariectomized females	Ovariectomized females	Ovariectomized females	Ovariectomized females	Ovariectomized females	Ovariectomized females	Ovariectomized females	Ovariectomized females	Ovariectomized females	Ovariectomized females	Ovariectomized females	Ovariectomized females
7	0.153633	0.0711156	0.135796	0.134207	0.0964643	0.108486	0.134014						0.0996013	0.143867	0.141647	0.149664	0.0718471	0.100197	0.124435						0.0619392	0.0883362	0.064506	0.0806419	0.057231	0.101177	0.0872724	0.11124					0.144004	0.108909	0.140449	0.087914	0.0818525	0.128586	0.110068	0.110728
8	0.0797278	0.0157486	0.0371595	0.0232576	0.012653	0.0231685	0.0607437						0.0281723	0.0309951	0.0113634	0.0405157	0.0226683	0.0652108	0.0370153						0.0185791	0.0449681	0.0028358	0.0292991	0.0199951	0.0618057	0.0581776	0.0499713					0.0879806	0.0987394	0.0244635	0.0135397	0.0896937	0.0698177	0.0839304	0.0779169
9	0.055282	0.0133086	0.00550669	0.0133459	0.0128131	0.00520866	0.000141887						0.0601332	0.000817069	0.0400999	0.0354561	0.00355393	0.055895	0.0747298						0.00275124	0.00485633	0.0125773	0.0132785	0.000520622	0.00176026	0.0442402	0.00203668					0.0145232	0.00990805	0.0530099	0.00471115	0.00224839	0.0129698	0.0756924	0.0381166
10	0.0044705	0.000322749	0.0117947	0.00984606	0.0107043	0.0160592	0.027676						0.0173693	0.0957965	0.0172762	0.0281691	0.0084526	0.0300233	0.00167827						0.00380265	0.00648138	0.0131543	0.026974	0.00189865	0.00915262	0	0.006229					0.000780816	0.0158006	0.0176469	0.0154448	0.0633175	0.0286244	0.000313869	0.00791945
11	0.0164397	0.00931113	0.0403434	0.0526218	0.00799583	0.00486397	0.00503495						0.0256955	0	0.0673452	0.0726076	0.00681971	0.0311365	0.0290248						0.00572384	0.0107166	0.0802911	0.0512096	0.00565201	0.0174969	0.00280374	0.0499626					0.0433049	0.00569779	0.125665	0.0405434	0.012346	0.037465	0.0330381	0.0339707
12	0.0245093	0.0367351	0.0453824	0.064418	0.0790248	0.0642657	0.0464618						0.0519478	0.0388448	0.0817433	0.0794675	0.0329459	0.070191	0.0426935						0.0271549	0.0354897	0.122911	0.0865205	0.0824227	0.105453	0.0189109	0.036817					0.0565268	0.0625961	0.0429668	0.0983267	0.0353698	0.052991	0.01472	0.0833066
13	0.0480838	0.0895397	0.0844819	0.0666111	0.00488539	0.143473	0.0589681						0.0567989	0.0718097	0.105439	0.139577	0.0291999	0.0497347	0.107615						0.0884187	0.0709501	0.12633	0.104691	0.0807095	0.0696476	0.055472	0.0929853					0.0739477	0.0387158	0.0640393	0.134051	0.0969949	0.0339484	0.0823838	0.0981725
14	0.0862016	0.0926505	0.0661015	0.0632558	0.0986107	0.12585	0.130572						0.0788081	0.0542087	0.0982292	0.111007	0.0195947	0.0962051	0.0965754						0.0867174	0.0711488	0.104011	0.1182	0.0880291	0.0118119	0.0648282	0.103639					0.0544576	0.0575447	0.12781	0.140548	0.0437912	0.0171595	0.0723218	0.0749387
15	0.109199	0.084747	0.0866825	0.0722055	0.105561	0.133565	0.132745						0.0833264	0.0926255	0.01237	0.116304	0.106522	0.0823024	0.0636719						0.091265	0.103288	0.0999389	0.0865699	0.0999156	0.0465979	0.0791531	0.11764					0.0885403	0.0841697	0.0900251	0.120193	0.0655739	0.056863	0.0796953	0.108207
16	0.11864	0.0918261	0.0859383	0.024955	0.116159	0.104192	0.0759255						0.0870127	0.078035	0.0406442	0	0.111901	0.0506972	0.00531454						0.0921575	0.105421	0.0899257	0.0792156	0.100225	0.145025	0.108712	0.0805912					0.0206005	0.0737215	0.0199652	0.0380583	0.070667	0.11477	0.0961667	0.0432693
17	0.0798682	0.100781	0.044787	0.00469157	0.112936	0.017797	0.0372351						0.0921582	0.0189628	0.028826	0.047875	0.000960523	0.0518439	0.0417984						0.0943695	0.0896539	0.0215258	0.0307901	0.100513	0.0923459	0.0967578	0.0334544					0.0124887	0.0758776	0.00139272	0.0463229	0.104417	0.0786887	0.0704112	0.0269989
18	0.0144298	0.0253164	0.0288304	0.0853708	0.0463431	0.0324536	0.00704163						0.0562485	0.0183646	0.0559669	0.0377165	0.0400538	0.00137268	0.0367542						0.0914863	0.0522797	0.00333479	0.0258904	0.0888084	0.0342949	0.0835021	0.00133748					0.0751015	0.0853207	0.00576985	0.0127671	0.0484168	0.0756107	0.025246	0.00221677
19	0.00337207	0.000425796	0.0298243	0.0123708	0.0123055	0.0522565	0.10393						0.00877423	0.0247796	0.0298997	0.0518701	0.031313	0.0269431	0.018517						0.0935167	0.000257247	0.00341721	0.0686298	0.0847882	0.00531857	0.0451517	0.04566					0.0769842	0.0142733	0.0506743	0.0508919	0.000991224	0.0201997	0.00783763	0.0207039
20	0.0149139	0.0405731	0.0842268	0.0296432	0.074722	0.0140126	0.032496						0.0337465	0.0132336	0.00767998	0.00769443	0.0884641	0.0636624	0.00219108						0.0665832	0.00309115	0.0238158	0.0368819	0.0146848	0.0494914	0.00233964	0.046864					0.0493736	0.0283695	0.0482695	0.0256053	0.00298173	0.027316	0.00394838	0.0169135
21	0.0364718	0.0384285	0.0422675	0.103622	0.0320651	0.0400966	0.00295124						0.0465591	0.0715908	0.0231965	0.0299761	0.044184	0.0367946	0.117936						0.0136214	0.0562473	0.0586562	0.00209279	0.0327228	0.0524528	0.00354056	0.00799297					0.00504928	0.0210911	0.0784768	0.0377007	0.053518	0.0594041	0.0205561	0.0264659
22	0.03742	0.0244531	0.00427353	0.0361044	0.0109155	0.00964416	0.0452942						0.0270331	0.072262	0.0450733	0.0114464	0.00489866	0.00530659	0.0388707						0.0092044	0.0546076	0.00446866	0.0499433	0.0091109	0.011166	0.00246882	0.0325986					0.048788	0.0383882	0.00198095	0.0260294	0.0413413	0.00412917	0.0306591	0.109282
23	0.0023905	0.110612	0.0429266	0.0135494	0.0316972	0.00203942	0.00762134						0.0125758	0.00481487	0.00674794	0.00382422	0.0227644	0.0198369	0.00432622						0.0312059	0.0539717	0.059525	0.0211184	0.0180331	0.0236238	0.00532759	0.00459269					0.0112524	0.00397562	0.0195587	0.000880332	0.00190186	0.0308931	0.0604221	0.0267281
24	0.00169605	0.0683975	0.0212613	0.00424835	0.0018431	0.018788	0.0314745						0.00882543	0.0300759	0.0392424	0.0341354	0.0486024	0.00018414	0.00029836						0.00751023	0.039957	0.0350543	0.00333819	0.0219149	0.0436818	0.0650076	0.0244402					0.000707072	0.0368785	0.0237714	0.00195094	0.00169233	0.00124783	0.0371503	0.0257805
1	0.0438703	0.0343514	0.0638849	0.0971702	0.0593572	0.00287721	0.00848887						0.0121086	0.0219441	0.00829139	0.00269404	0.108251	0.0383431	0.0131558						0.0138797	0.00173171	0.00290263	0.0179135	0.017981	0.000876355	0.0517783	0.0539721					0.0237325	0.00539674	0	0.0621367	0.0187043	0.0183998	0.000614091	0.00017768
2	0.0202692	0	0.00047838	0.0592207	0.000439481	0.0356156	0.00719973						0.0337337	0.0489609	0.0337993	0	0.106138	0.075054	0.0731075						0.0289924	0.0331243	0.0275761	0.0250564	0.0219019	0.0514481	0.0459794	0.0368982					0.0416739	0.0316411	0.0198874	0.00522468	0.106375	0.0326401	0.00318418	0.00699721
3	0.00691108	0.00516788	0.0379249	5.90961e-05	0.0190953	0.0142137	0						0.0180924	0.0454981	0.0490997	0	0.0106618	0.00939954	0.00461526						0.00689159	0.0386477	0.00558917	0.00424081	0.00478159	0.0269932	0.0022894	0.000339447					0.0215245	0.0620205	0.0415395	0.00768686	0.0184626	0.0075172	0.0422768	0
4	0.0289765	0.0454765	0	0.0262157	0.0533884	0.00624991	0.0152751						0.0324026	0	0.00264698	0	0.023917	0.00404272	0.0556348						0.0485051	0.00331075	0.000948978	5.52238e-05	0.0481608	0.00152229	0.000373194	0.030559					0.000759127	0.000265631	0.000259513	0.0294728	0.000177292	0.0863268	0.0152886	0.0541501
5	0	0.000680496	0	0.000134608	2.0441e-05	0.0229578	0.0283327						0.0187964	0.0184521	0.0246878	0	0.0401498	0.00012555	0.00126803						0.00974925	0.0195529	0.0274691	0.02574	0	0.036856	0.0631368	0.0298278					0.01877	0.0386937	0.00162628	0	0.0391654	0.00443167	0.000236539	0.00665031
6	0.0132245	3.11084e-05	0.000127568	0.00287601	0	0.00186468	0.000377013						0.0100798	0.00406103	0.0286843	0	0.0161368	0.0354973	0.00877365						0.00597498	0.0119108	0.00923583	0.0117094	0	0	0.0127771	0.000351052					0.0291288	0.00200552	0.000752589	0	0	0	0.0338387	0.000389204
day 28
	Intact males	Intact males	Intact males	Intact males	Intact males	Intact males	Intact males	Intact males	Intact males	Intact males	Intact males	Intact males	Castrated males	Castrated males	Castrated males	Castrated males	Castrated males	Castrated males	Castrated males	Castrated males	Castrated males	Castrated males	Castrated males	Castrated males	Intact females	Intact females	Intact females	Intact females	Intact females	Intact females	Intact females	Intact females	Intact females	Intact females	Intact females	Intact females	Ovariectomized females	Ovariectomized females	Ovariectomized females	Ovariectomized females	Ovariectomized females	Ovariectomized females	Ovariectomized females	Ovariectomized females	Ovariectomized females	Ovariectomized females	Ovariectomized females	Ovariectomized females
7	0.0382547	0.0225079	0.0555128	0.048331	0.0527868	0.0912673	0.0634867						0.0699029	0.0279214	0.0497939	0.131966	0.0552718	0.0460058	0.110895	0.111359					0.0397145	0.0450209	0.0549776	0.0519831	0.0581811	0.0701548	0.0965283	0.0730306					0.0442354	0.124285	0.11192	0.0497568	0.105103	0.116612	0.0603951
8	0.0858489	0.0899999	0.057654	0.025299	0.0469441	0.0597391	0.0454693						0.104505	0.0385811	0.0627035	0.118389	0.0582904	0.0965071	0.0851494	0.0856732					0.0370627	0.0541293	0.0386401	0.0524737	0.0461665	0.0367012	0.076587	0.0599179					0.0508967	0.103702	0.0591653	0.0634504	0.0621372	0.085583	0.0856299
9	0.124099	0.123813	0.0953113	0.0685118	0.0571656	0.0654849	0.0965821						0.115603	0.0165481	0.0762136	0.0163151	0.127184	0.082605	0.086165	0.125045					0.0678319	0.0426002	0.00676755	0.0375938	0.0660777	0.0968946	0.0720169	0.0525439					0.10492	0.0714914	0.0801072	0.140853	0.0761256	0.0875371	0.0670478
10	0.0400441	0.107427	0.0607652	0.00357745	0.000469312	0.0154133	0.0495695						0.165874	0.00124419	0.0581898	0.000684547	0.0203112	0.0872936	0.0909064	0.0783827					0.0479566	0.000744563	0.014827	0.000351426	0.0458722	0.0795754	0.0802757	0.0425914					0.101047	0.0858833	0.000653468	0.138162	0.0704091	0.22443	0.0208939
11	0.000267734	0.0161674	0.00163488	0.000872226	0.00798691	0.000636823	0.00188932						0.0245873	0.00885878	0.000839905	0.00379353	0.000682958	0.0990606	0.0221148	0.00632749					0.000541823	0.0389198	0.0470966	0.0283106	0.000267873	0.00337817	0.0410775	0.000743594					0.0311522	0.057465	0.00796524	0.000422967	0.037059	0.0551585	0.000552816
12	0.00916097	0.0169185	0.0901138	0.00184629	0.0398958	0.028103	0.00218635						0.00284462	0.00151694	0.027748	0.033191	0.0287696	0.00230176	0.0384068	0.0602203					0.00315107	0.0233477	0.0183518	0.0521188	0.0452346	0.00270375	0.00386241	0.0196708					0.000794465	0.0253801	0.0647507	0.000142751	0.00719131	0.000769791	0.0256243
13	0.0302897	0.037413	0.0489855	0.0198398	0.0435082	0.0634449	0.0749942						0.0441732	0.0730784	0.0240773	0.0276101	0.0368285	0.0645147	0.0747533	0.00298694					0.0621842	0.0697401	0.0761637	0.0277922	0.0616031	0.0525653	0.0559466	0.0491564					0.026831	0.0884762	0.0934371	0.0818653	0.0144483	0.00847954	0.0833873
14	0.0724221	0.0567981	0.0277137	0.0334855	0.0399475	0.0556483	0.0457694						0.0193877	0.000474511	0.0127355	0.0784187	0.0854311	0.0402906	0.118099	0.106935					0.117699	0.0947523	0.104696	0.0903145	0.00512354	0.0709234	0.0782799	0.0973833					0.00188685	0.101966	0.056472	0.000174474	0.0940637	0.086187	0.0485787
15	0.0165951	2.10822e-05	0.0270732	0.0214249	0.0252567	0.0267646	0.0247204						0.0232466	0.00853372	0.00451993	0.00811949	0.000898089	0.0329832	0.159691	0.0648926					0.0735667	0.0604813	0.0428007	0.0817899	0.0576058	0.0147248	0.0492028	0.100079					0.101534	0.0182983	0	0.0598816	0.0398552	0.00196593	0.0082357
16	0.00325743	0.0410207	0.0562998	0.0168911	0.0128523	0.0274626	1.83727e-05						0.0276185	0.0420895	0.04477	0.0210688	0.1125	0.0417259	0.000686748	0.00103076					0	0	0.0230361	0.0615203	0.0607127	0.00774064	0.0803753	0.0014562					0.0368153	0.00320963	0.0237015	6.34451e-05	0.00113893	0.00885852	0.036668
17	0.000736269	0	0.00161658	0.0268176	0.0333987	0.0642724	0.0347734						0.0397431	0	0.00433018	0.0684547	0.0453586	0.00118684	0.0366241	0.0411024					0.00375026	0.0783277	0.0710334	0	0	0.0185648	0.0113457	0.0514319					0.000779187	6.8533e-05	0.0188004	0	0.0111702	0	0.0469579
18	0.0319184	0.0360453	0.0457219	0	0.00767691	0.000658411	0						0	0.0298531	0	0.00485838	8.19549e-05	0	0	0.00143704					0.0533344	0.103494	4.0283e-05	2.6096e-05	0.0633537	0.0179481	0	0.00053704					0.0515741	0.0638842	0.0284568	0.0558423	4.38049e-05	0.000592147	0
19	0	0	0.0340215	0.060312	0.0225657	0.0535615	0.047573						0.0396848	0.0147883	0.000304854	0.0174655	0.0453074	0.0349057	0.0714511	0.0238127					0	0.027871	0.0719311	0.0595892	0.0191982	0.0146519	0.0535122	0.0206623					0	0.0126443	0.0402413	0	0.00520548	0	0.0016396
20	0.0400084	0.00447206	0	0	0.00240253	0.0137331	0						0.0506669	0	0	0.0697573	0.0277281	0.00194865	0.0187979	0					0.0338586	0	0.000474764	0.0567239	0	0.0748636	0.105505	0.0786076					0	0	0.0005475	0.0658455	0.102533	0.0578705	0
21	0	0.0482018	0.01727	0.0290181	0.0925836	0.0348814	0.0290901						0.000279799	0	1.86646e-05	0	0.02096	0.00137975	0.000416432	0.0955519					0.000548197	0.00127502	0	0.0414873	0.0490075	0	0.0128606	7.22939e-05					0.0421882	0.112554	0	0.0199535	0.0130247	0.0308982	0
22	0	0	0.016117	0	0.0208779	5.39681e-05	9.18634e-05						0	0	0	0	0.0825149	0.0131174	0	0.00759901					0	0.0610985	0	2.08768e-05	0	0.0435244	0	0.0659974					0.000318295	0.00118791	0.0361659	0	0	0	0.094519
23	0.0284423	1.58117e-05	0.0459719	0.000464892	0.0226432	0.0524966	0.0258228						0	0	0.00738183	0	0	0	0	0					0.0312451	0	0	0.0440778	0	0.000306831	0	0.00631022					0.0183109	0.001028	0.0189903	0	0	0	0.00941672
24	0	0.0102486	0	0.0221953	0	0.00586453	0						0.0563328	0.00261915	0.0195636	0	0.00458265	0	0.00176801	0					0	0	0	0.00281488	0.00806825	0.00245768	0.0185832	0.0390146					0.023396	0.0445922	0.0106983	0	0.0361829	0.00968752	0.0261268
1	0.00176705	0.00219255	0.000628332	0	0.000310004	0.0406236	0.00027559						0.000804421	0.0348074	0.00178246	0.038078	0	0.000971055	0	0					0.00275373	0.000335632	0.0836879	0	0.051141	0.034684	0.0463298	0.0213026					0.000435428	0	0.0162175	0	0.000657074	0.0281566	0.003386
2	0	0.00218728	0.00695436	0.00450724	0.012525	0.000982219	0.00464216						0	0.0005866	0.0285474	6.65532e-05	0.000228791	0.000814117	0.036646	0.0372126					0.118532	0.0162145	0.103156	0.0470475	0.000550837	0.00291033	8.6867e-05	0					0.000445614	0.00943471	0	0.0628847	0	5.32932e-05	0.00198511
3	0.000807664	0.0431527	0.0535242	0.0979195	0.0169081	0.0299199	0.0360441						0.0121246	0.00760338	0.136849	0.00447808	0.000464411	0.000336763	0	0.00353617					0.109104	0.10746	0.000759623	0	0.0183719	0.000811126	0.000222464	0.106093					0.068869	0.0104627	0.026227	0	0.00843244	0.0239938	0.00974338
4	0.0645329	0.00717059	0.0337957	0.0787261	0.0597576	0.095009	0.158228						0.0292856	0.196291	0.0844571	0.0505424	0.0363265	0.056282	0.00103012	0.0249865					0.00926836	0.0409722	0	0.0699458	0.105225	0.0890781	0.0252232	0.0163832					4.32882e-05	0.00260426	0.000331149	0.0097864	0.00462872	0.0107593	0.0116028
5	0.175174	0.144866	0.068476	0.166746	0.178713	0.0437645	0.15076						0.0173708	0.225064	0.202209	0.098841	0.0760849	0.122529	0.0122519	0.0829722					0.0255889	5.20809e-05	0.107176	0.116285	0.126083	0.121183	0.0905726	0					0.103336	0.00261568	0.149856	0.0321508	0.0745195	0.0321417	0.20005
6	0.236373	0.18936	0.154838	0.273215	0.202824	0.130214	0.108013						0.155965	0.269541	0.152965	0.207903	0.134194	0.17324	0.0341475	0.0389355					0.162309	0.133163	0.134384	0.0777329	0.112156	0.143654	0.00160598	0.097015					0.19019	0.0587671	0.155296	0.218764	0.236072	0.130266	0.157559
day 35
	Intact males	Intact males	Intact males	Intact males	Intact males	Intact males	Intact males	Intact males	Intact males	Intact males	Intact males	Intact males	Castrated males	Castrated males	Castrated males	Castrated males	Castrated males	Castrated males	Castrated males	Castrated males	Castrated males	Castrated males	Castrated males	Castrated males	Intact females	Intact females	Intact females	Intact females	Intact females	Intact females	Intact females	Intact females	Intact females	Intact females	Intact females	Intact females	Ovariectomized females	Ovariectomized females	Ovariectomized females	Ovariectomized females	Ovariectomized females	Ovariectomized females	Ovariectomized females	Ovariectomized females	Ovariectomized females	Ovariectomized females	Ovariectomized females	Ovariectomized females
7	0.0824431	0.0372423	0.0792144	0.0329085	0.073853	0.0684149	0.0781112						0.0693824	0.0677372	0.0722108	0.111518	0.0511817	0.0234342	0.102012	0.0634462					0.0814563	0.0658008	0.0998127	0.0381577	0.0499983	0.0714281	0.0597897	0.0709376					0.0437382	0.0560884	0.158254	0.0827156	0.0990479	0.102396	0.102026
8	0.116145	0.0366327	0.0654405	0.0397487	0.0424641	0.0503757	0.0609789						0.0918696	0.0653738	0.0583471	0.0864479	0.0492961	0.0799889	0.0873944	0.0547165					0.0538844	0.0568078	0.0846998	0.034012	0.0450628	0.0493972	0.0727388	0.0603895					0.039778	0.0548793	0.169533	0.0633437	0.072707	0.0739753	0.0874624
9	0.0795565	0.100502	0.10839	0.0984292	0.0861449	0.0109131	0.0487395						0.117739	0.0815374	0.0788301	0.0467945	0.0939616	0.0671798	0.137388	0.0844608					0.0313219	0.0584012	0.0356683	0.0298669	0.0417548	0.0560638	0.0619851	0.0482744					0.095786	0.0751907	0.107319	0.0851201	0.0797888	0.0638819	0.113826
10	0.107211	0.103691	0.104709	0.00860036	0.0504307	0.00547726	0.0216575						0.144806	0.0174742	0.0476498	0.00770574	0.114978	0.0286387	0.0932489	0.0722812					0.0157453	0.00953527	0.0175459	0.0276675	0.0385432	0.00974996	0.0398493	0.0147898					0.0881298	0.0143023	0.173477	0.0288685	0.156036	0.0991067	0.028641
11	0.0499104	0.0643623	0.00778294	0.00130995	0.0280094	0.0124791	0.000677139						0.116118	0.00584444	0.0161347	0.00369014	0.00730676	0.0151069	0.00231913	0					0.00323338	0.0772448	0.0242275	0.0311364	0.00726198	0.000233165	0.000490855	0.00885493					0.00305741	0.000441126	0.05092	0.00086032	0.0366882	0.0139416	0.0098167
12	0.00342466	0.00219544	0.00109289	0.013753	0.00740642	0.0216116	0.00551905						0.0013154	0.00828857	0.0471496	0.0484361	0.0238992	0.0288685	0.0176315	0.0298038					0.0130864	0.0562906	0.00804537	0.00674848	0.0857459	0.0656358	0.0522896	0.046073					0.00690771	0.0651657	0	0.0499316	0.00209775	0.0171556	0.00421739
13	0.00351487	0.0669681	0.0642856	0.0118099	0.0745601	0.0207872	0.0951454						0.0230161	0.023931	0.0111773	0.0380884	0.0543587	0.091461	0.103394	0.128814					0.0643804	0.0257227	0.0892889	0.0188897	0.0824566	0.000380427	0.0841681	0.0488739					0.0038059	0.126103	0.103875	0.0246478	0.125374	0.0519558	0.0206573
14	0.037929	0.0269306	0.0125837	0.0310031	0.0603764	0.0433249	0.0561662						0.0720967	0.0641599	0.0531759	0.101007	0.10885	0.178689	0.130989	0.0575395					0.119145	0.0595508	0.0576687	0.0437929	0.0755084	0.0749133	0.101267	0.0724449					0.0785136	0.0202591	0.00413246	0.0882416	0.0507997	0.120707	0.0605256
15	0.0165853	0.0319067	0.0402377	0.0157688	0.00394887	0.0387888	0.00571928						0.0425801	6.98324e-05	0.00019765	0.00981166	0.0561806	0.0276282	0.000113313	0					0.0320914	0.108909	0	0.0410346	0.0875148	0.0397454	0.099612	0.00253799					0.089354	0.102982	0.0245913	0.0226477	0.0372387	0.000456837	0.0113275
16	0.10897	0.00284144	0.0261894	0.0179501	0.0402188	0.0138607	0.0555946						6.95981e-05	0.0327031	0	0.0545864	0.00215569	1.66102e-05	0.0142623	0					0.0304365	0.101611	0.0191712	0.043957	0.0574249	0.00107379	0.0378386	0.000655531					0.00114177	0.116186	0	0.0266515	0.0489251	0.00406854	0.0669627
17	0.0861641	0.0305394	0	0.0281509	0.00443559	0.04139	0.000109216						0.0287927	0	0.0329874	8.1365e-05	0.0666644	0.00971971	0.0148666	0.0234623					0.0155582	0.0430631	0.0644849	0.0484217	3.72728e-05	0.0761927	2.47679e-05	0.0920127					0.0448293	0	0.0292403	0	0.000133899	0	0.0686811
18	0.000415598	0.00719832	0.0855991	0.0242442	0.0819665	0	0.0624497						0	0.0246616	0.00148036	0.0126546	0.0277048	0.00659423	0.00447208	0.000160137					0.00872776	6.00647e-05	0.00291289	0.0461597	0.0318449	0.0385734	0.0596772	0.00257655					0	0.0347542	0.0776793	0.0680314	0.0474448	0.0360203	0.0129457
19	0.0228064	0.0329024	5.30957e-05	0.0320313	0.00861404	0.0437239	0						0.0454546	0.0055275	0.0354883	0.045933	2.94627e-05	0.0223268	0.0150479	0.00691791					0.0128044	0.000393757	0	0.0438437	0.0484236	0.0425648	0.0795297	0.0816329					0.0394799	0	0.00122878	0.00258464	0.0128989	0.00275715	0.0717958
20	0.034659	0.0306973	0.0641618	0	0.0216407	0.00245441	0.0327794						0.00452388	0.00096691	0	0.000397253	0.0726895	0.000238079	0.00855889	0.0493862					0	0.0713201	0.108468	0.0440032	0	0.0292499	0.000312976	0.0301124					4.22878e-05	0.000215662	8.60929e-05	0.0540862	0.00780332	0.0258623	0.088558
21	9.34291e-05	0	0.00793781	0.0317002	0.0354066	0.0445973	0.026048						0.000132236	0.0590675	0	0.000646134	0	0.0286996	0.0517689	0					0	0.00322013	0.0421392	0.0436123	0.0220546	0	0.0401848	0.0477521					0	0.0668061	0.0377478	0.0124342	0.0129138	0.0738141	0.0182873
22	0.0365372	0.0123348	0.0742322	0.0125622	0.0271875	0	0.0354661						0.0853621	3.22303e-05	0	0.0723766	0.000171866	0.000459548	0.000317276	0.0254663					0	0	0	0.0447117	0.0200031	0.0372757	0.0405203	0.0325277					0.00747859	0	0	0	0.0215503	0	0
23	0.000173971	0	0	0.020509	0.00743856	0.0536847	0.0254073						0.00115533	0.0178932	0	0	0	0	0	0					0.05258	0.0106782	0.0672073	0.0486445	0	0	0.000330989	0.018418					0.043364	0.0248632	0	0.0458469	4.46329e-05	0	0.0360161
24	0.0133861	0.0101709	0.0509675	0.00263442	5.51005e-05	0.0405769	0.00266851						0.00186523	0	0.00012101	0.00986431	0	0.000204859	0.0315009	0.00113468					0.00468274	0.0710582	0.0167459	0.0550542	0.0240736	0.0130664	0.0327139	0.0727007					0.00106142	0	9.39195e-05	0.000610312	0	0	0.00350136
1	3.22169e-05	0.000247715	0.00133624	0.00035145	0.00120762	0.00184834	0.00160184						0.00312496	0.0059465	0.00783339	2.87171e-05	0.062353	0.00273791	0.0408832	0					0.0164884	0	0.000921865	0.0532635	0.00651342	0.0146802	0.00389082	0.000105165					0.014437	0.0325551	0.04451	0.000330892	0	0.0568198	0.00496921
2	0.00188469	0.0148945	0.00116368	0.00143194	0.000280094	0.0502251	0.00696798						0.000306232	0	7.26061e-05	0.00410175	8.83882e-05	0.00984705	0.0253972	0.00863824					0	0	0.010364	0.0549594	0	0.000478601	0	0.03434					0.0205582	0	0	0.0187395	0	0	0.00208363
3	0.0375134	0.0122376	0.0366803	0.0645187	0.00360908	0.0292308	0.0234305						0	0.0317469	0.00197247	0.0127839	0.0015026	0.00482525	0.00265907	0.000732054					0.000418996	0.0326552	0.0823329	0.0539872	0.000396023	0.000220893	0.0306357	0.000757191					0	0.0240201	0	0.000242654	0.0341591	0.000161237	0.0357153
4	0.00147231	0.0817704	0.0219329	0.169744	0.0475471	0.0108303	0.00771793						0.0189446	0	0.177223	0.0321105	0.000289717	0.0449277	0.0203736	0.059333					0.0830824	0	0.000137137	0.0547234	0.0299456	0.103476	4.05293e-05	0.0156381					0.0776784	0.0811149	0.000547864	0.0368908	0.00377148	0.0368372	0.0155521
5	0.0315822	0.131959	0.0532727	0.191136	0.112947	0.205064	0.168185						0.0275817	0.192662	0.178542	0.116582	0.0852505	0.14571	0.0462014	0.121306					0.172816	0.0216416	0.0476907	0.0548749	0.124851	0.14439	0.0032536	0.0880445					0.14411	0	0	0.154582	0.00643458	0.000247229	0.111507
6	0.127589	0.161775	0.0927361	0.149703	0.180252	0.190341	0.178859						0.103764	0.294376	0.179406	0.184354	0.121087	0.182698	0.0492004	0.212401					0.18806	0.126036	0.120467	0.0384773	0.120585	0.13121	0.0988555	0.109551					0.156748	0.104073	0.0167646	0.132592	0.144142	0.219835	0.0249248

## Sheet: Fig 2 cast ovx experiment
		day 0 % weight		day 7 % weight		day 14 % weight		day 21 % weight	day 28 % weight
Mouse #	day 0		day 7		day 14		day 21
1278	24.9	1	21.3	0.855422	19.8	0.795181	19.8	0.795181	19.7
1279 dead
1280	21	1	18.5	0.880952	17.6	0.838095	17.8	0.847619	17.9
1281	19.4	1	17.8	0.917526	17.6	0.907216	17.9	0.92268	18.2
1282	17.4	1	15.2	0.873563	13.4	0.770115	14	0.804598	14.6
1283	19.2	1	17	0.885417	16.1	0.838542	15.3	0.796875	15.4
1284	20.5	1	18.6	0.907317	18.5	0.902439	18.9	0.921951	19
1285	23.6	1	20.1	0.851695	19.7	0.834746	19.5	0.826271	19.5
1286	23	1	20.4	0.886957	19.2	0.834783	19.3	0.83913
1287	25.7	1	21.7	0.844358	21	0.817121	21	0.817121
1288	19.4	1	17.7	0.912371	17.2	0.886598	17.6	0.907216
1289	21.7	1	19.4	0.894009	18.8	0.866359	18.9	0.870968
1290	18.2	1	15.7	0.862637	14.7	0.807692	14.9	0.818681
1291	19.4	1	16.7	0.860825	16.1	0.829897	16.4	0.845361
1292	21.2	1	18.4	0.867925	18	0.849057	18.9	0.891509
1293	19.8	1	17.8	0.89899	17.6	0.888889	17.9	0.90404
1294	23.2	1	21.1	0.909483	19.7	0.849138	19.5	0.840517
1295	24.3	1	20.7	0.851852	20	0.823045	18.6	0.765432
1296	18.3	1	16.9	0.923497	17.2	0.939891	17.8	0.972678
1297	21.5	1	20	0.930233	19.7	0.916279	19.9	0.925581
1298	17.8	1	15.8	0.88764	15.7	0.882022	16.1	0.904494
1299	19.5	1	16.9	0.866667	16.7	0.85641	16.8	0.861538
1300	19.7	1	17.9	0.908629	17.3	0.878173	18	0.913706
1301	20.8	1	18.5	0.889423	18.2	0.875	18.9	0.908654
1270	24.1	1	20.2	0.838174	19.4	0.804979	19.6	0.813278
1271	26.5	1	20.9	0.788679	18.4	0.69434	18.7	0.70566
1272	19.9	1	17.5	0.879397	17.5	0.879397	18	0.904523
1273	18.9	1	16.9	0.89418	16.6	0.878307	16.8	0.888889
1274	17.8	1	16.2	0.910112	14.8	0.831461	14.3	0.803371
1275	18.6	1	16	0.860215	15	0.806452	15.1	0.811828
1276	20.1	1	17.7	0.880597	16.9	0.840796	16.3	0.810945
1277	21.6	1	18.5	0.856481	17	0.787037	16.7	0.773148
	Intact male
-7	0.042201	0.0461881	0.000127568	0.0292263	0.0534089	0.0310724	0.0439849
0	0.0600209	0.0651622	0.046366	0.0627235	0.101492	0.0468633	0.0554623
7	0.161038	0.10145	0.12983	0.37727	0.276571	0.260377	0.15362	0.424614
14	0.353016	0.359143	0.361122	0.41263	0.345785	0.270573	0.34313
21	0.338633	0.346255	0.22648	0.429549	0.284364	0.230865	0.422102
28	0.47608	0.341397	0.25711	0.518686	0.441295	0.268988	0.417001
35	0.160643	0.375505	0.167942	0.510584	0.340746	0.406235	0.354763
	castrated male
-7	0.0612788	0.0225132	0.0560191	0	0.0802036	0.0396655	0.0656765
0	0.0229613	0.033348	0.00531872	0.0290563	0.135112	0.0705029	0.0586974
7	0.0808592	0.189818	0.329974	0.369868	0.169944	0.326286	0.144297	0.336615
14	0.287199	0.367194	0.62448	0.527484	0.157881	0.378335	0.146934	0.290249
21	0.121833	0.176976	0.473982	0.2263	0.254055	0.241726	0.102847	0.240286
28	0.202621	0.690895	0.439631	0.357286	0.246606	0.352052	0.0474295	0.146894
35	0.15029	0.487038	0.535172	0.333046	0.206627	0.373335	0.115775	0.39304
	intact female
-7	0.0642293	0.0347744	0.037654	0.0375046	0.0481608	0.0383783	0.0762871	0.0607378
0	0.0799878	0.0241252	0.0689332	0.0722527	0.115159	0.0646443	0.107648	0.0166449
7	0.106292	0.0625001	0.108542	0.0898899	0.165726	0.127735	0.138231	0.0891746
14	0.124568	0.229507	0.10606	0.0896148	0.19764	0.28059	0.00632106	0.0738249
21	0.138127	0.202647	0.0221595	0.197825	0.23347	0.260701	0.101066
28	0.197166	0.174187	0.24156	0.263964	0.343463	0.353915	0.117402	0.113398
35	0.443959	0.147677	0.168295	0.148076	0.275382	0.379076	0.10215	0.213233
	ovx female
-7	0.0486579	0.0409648	0.00263839	0.0294728	0.0393427	0.0907585	0.0493638	0.0611896
0	0.0704995	0.0474565	0.00766181	0.0222991	0.0306872	0.0285014	0.0615524	0.0429344
7	0.0736824	0.09584	0.0929402	0.198726	0.406073	0.0971793	0.125999
14	0.173062	0.177423	0.0471313	0.137927	0.385257	0.270809	0.335116	0.214335
21	0.348957	0.332882	0.0527238	0.195912	0.122996	0.187387	0.265971	0.269097
28	0.29357	0.063987	0.305483	0.260701	0.31522	0.173167	0.369212
35	0.815589	0.574292	0.405338	0.59454	0.823472	0.631363	0.970299
normalied high activity data in 3 hours prior to scheduled feeding
	Intact Males	Intact Males	Intact Males	Intact Males	Intact Males	Intact Males	Intact Males	Intact Males	Castrated males	Castrated males	Castrated males	Castrated males	Castrated males	Castrated males	Castrated males	Castrated males
-7	0.042201	0.0461881	0.000127568	0.0292263	0.0534089	0.0310724	0.0439848		0.0612788	0.0225132	0.0560191	0	0.0802036	0.0396655	0.0656765
0	0.0600209	0.0651622	0.046366	0.0627235	0.101492	0.0468633	0.0554623		0.0229613	0.033348	0.00531872	0.0290563	0.135112	0.0705029	0.0586974
7	0.161038	0.10145	0.12983	0.37727	0.276571	0.260377	0.15362	0.424614	0.0808592	0.189818	0.329975	0.369868	0.169944	0.326286	0.144297	0.336615
14	0.353016	0.359143	0.361122	0.41263	0.345785	0.270573	0.34313		0.287199	0.367194	0.62448	0.527484	0.157881	0.378335	0.146934	0.290249
21	0.338633	0.346255	0.22648	0.429549	0.284364	0.230865	0.422102		0.121833	0.176976	0.473982	0.2263	0.254055	0.241726	0.102847	0.240286
28	0.47608	0.341397	0.25711	0.518686	0.441295	0.268988	0.417001		0.202621	0.690895	0.439631	0.357286	0.246606	0.352052	0.0474294	0.146894
35	0.160643	0.375505	0.167942	0.510584	0.340746	0.406235	0.354763		0.15029	0.487038	0.535172	0.333046	0.206627	0.373335	0.115776	0.39304
normalied high activity data in 3 hours prior to scheduled feeding
	Intact Females	Intact Females	Intact Females	Intact Females	Intact Females	Intact Females	Intact Females	Intact Females	Ovariectomized Females	Ovariectomized Females	Ovariectomized Females	Ovariectomized Females	Ovariectomized Females	Ovariectomized Females	Ovariectomized Females	Ovariectomized Females
-7	0.0642293	0.0347744	0.0376539	0.0375046	0.0481608	0.0383783	0.0762871	0.0607378	0.0486579	0.0409648	0.00263839	0.0294728	0.0393427	0.0907585	0.0493639	0.0611896
0	0.0799878	0.0241252	0.0689332	0.0722527	0.115159	0.0646444	0.107648	0.0166449	0.0704995	0.0474565	0.00766181	0.0222991	0.0306872	0.0285014	0.0615524	0.0429344
7	0.106292	0.0625001	0.108542	0.0898898	0.165726	0.127735	0.138232	0.0891746	0.0736824	0.09584	0.0929402	0.198726	0.406073	0.0971793	0.125999
14	0.124568	0.229507	0.10606	0.0896148	0.19764	0.28059	0.00632106	0.0738249	0.173062	0.177423	0.0471312	0.137928	0.385257	0.270809	0.335116	0.214335
21	0.138127	0.202647	0.0221595	0.197825	0.23347	0.260701	0.101066		0.348957	0.332882	0.0527238	0.195912	0.122996	0.187387	0.265971	0.269097
28	0.197166	0.174187	0.24156	0.263964	0.343463	0.353915	0.117402	0.113398	0.29357	0.063987	0.305483	0.260701	0.31522	0.173167	0.369212
35	0.443959	0.147677	0.168295	0.148076	0.275382	0.379076	0.10215	0.213233	0.378537	0.185188	0.0173125	0.324065	0.154348	0.25692	0.151983
day -7
normalized high activity hourly bins
	Intact males	Intact males	Intact males	Intact males	Intact males	Intact males	Intact males	Intact males	Intact males	Intact males	Intact males	Intact males	Castrated males	Castrated males	Castrated males	Castrated males	Castrated males	Castrated males	Castrated males	Castrated males	Castrated males	Castrated males	Castrated males	Castrated males	Intact females	Intact females	Intact females	Intact females	Intact females	Intact females	Intact females	Intact females	Intact females	Intact females	Intact females	Intact females	Ovariectomized females	Ovariectomized females	Ovariectomized females	Ovariectomized females	Ovariectomized females	Ovariectomized females	Ovariectomized females	Ovariectomized females	Ovariectomized females	Ovariectomized females	Ovariectomized females	Ovariectomized females
7	0.153633	0.0711156	0.135796	0.134207	0.0964643	0.108486	0.134014						0.0996013	0.143867	0.141647	0.149664	0.0718471	0.100197	0.124435						0.0619392	0.0883362	0.064506	0.0806419	0.057231	0.101177	0.0872724	0.11124					0.144004	0.108909	0.140449	0.087914	0.0818525	0.128586	0.110068	0.110728
8	0.0797278	0.0157486	0.0371595	0.0232576	0.012653	0.0231685	0.0607437						0.0281723	0.0309951	0.0113634	0.0405157	0.0226683	0.0652108	0.0370153						0.0185791	0.0449681	0.0028358	0.0292991	0.0199951	0.0618057	0.0581776	0.0499713					0.0879806	0.0987394	0.0244635	0.0135397	0.0896937	0.0698177	0.0839304	0.0779169
9	0.055282	0.0133086	0.00550669	0.0133459	0.0128131	0.00520866	0.000141887						0.0601332	0.000817069	0.0400999	0.0354561	0.00355393	0.055895	0.0747298						0.00275124	0.00485633	0.0125773	0.0132785	0.000520622	0.00176026	0.0442402	0.00203668					0.0145232	0.00990805	0.0530099	0.00471115	0.00224839	0.0129698	0.0756924	0.0381166
10	0.0044705	0.000322749	0.0117947	0.00984606	0.0107043	0.0160592	0.027676						0.0173693	0.0957965	0.0172762	0.0281691	0.0084526	0.0300233	0.00167827						0.00380265	0.00648138	0.0131543	0.026974	0.00189865	0.00915262	0	0.006229					0.000780816	0.0158006	0.0176469	0.0154448	0.0633175	0.0286244	0.000313869	0.00791945
11	0.0164397	0.00931113	0.0403434	0.0526218	0.00799583	0.00486397	0.00503495						0.0256955	0	0.0673452	0.0726076	0.00681971	0.0311365	0.0290248						0.00572384	0.0107166	0.0802911	0.0512096	0.00565201	0.0174969	0.00280374	0.0499626					0.0433049	0.00569779	0.125665	0.0405434	0.012346	0.037465	0.0330381	0.0339707
12	0.0245093	0.0367351	0.0453824	0.064418	0.0790248	0.0642657	0.0464618						0.0519478	0.0388448	0.0817433	0.0794675	0.0329459	0.070191	0.0426935						0.0271549	0.0354897	0.122911	0.0865205	0.0824227	0.105453	0.0189109	0.036817					0.0565268	0.0625961	0.0429668	0.0983267	0.0353698	0.052991	0.01472	0.0833066
13	0.0480838	0.0895397	0.0844819	0.0666111	0.00488539	0.143473	0.0589681						0.0567989	0.0718097	0.105439	0.139577	0.0291999	0.0497347	0.107615						0.0884187	0.0709501	0.12633	0.104691	0.0807095	0.0696476	0.055472	0.0929853					0.0739477	0.0387158	0.0640393	0.134051	0.0969949	0.0339484	0.0823838	0.0981725
14	0.0862016	0.0926505	0.0661015	0.0632558	0.0986107	0.12585	0.130572						0.0788081	0.0542087	0.0982292	0.111007	0.0195947	0.0962051	0.0965754						0.0867174	0.0711488	0.104011	0.1182	0.0880291	0.0118119	0.0648282	0.103639					0.0544576	0.0575447	0.12781	0.140548	0.0437912	0.0171595	0.0723218	0.0749387
15	0.109199	0.084747	0.0866825	0.0722055	0.105561	0.133565	0.132745						0.0833264	0.0926255	0.01237	0.116304	0.106522	0.0823024	0.0636719						0.091265	0.103288	0.0999389	0.0865699	0.0999156	0.0465979	0.0791531	0.11764					0.0885403	0.0841697	0.0900251	0.120193	0.0655739	0.056863	0.0796953	0.108207
16	0.11864	0.0918261	0.0859383	0.024955	0.116159	0.104192	0.0759255						0.0870127	0.078035	0.0406442	0	0.111901	0.0506972	0.00531454						0.0921575	0.105421	0.0899257	0.0792156	0.100225	0.145025	0.108712	0.0805912					0.0206005	0.0737215	0.0199652	0.0380583	0.070667	0.11477	0.0961667	0.0432693
17	0.0798682	0.100781	0.044787	0.00469157	0.112936	0.017797	0.0372351						0.0921582	0.0189628	0.028826	0.047875	0.000960523	0.0518439	0.0417984						0.0943695	0.0896539	0.0215258	0.0307901	0.100513	0.0923459	0.0967578	0.0334544					0.0124887	0.0758776	0.00139272	0.0463229	0.104417	0.0786887	0.0704112	0.0269989
18	0.0144298	0.0253164	0.0288304	0.0853708	0.0463431	0.0324536	0.00704163						0.0562485	0.0183646	0.0559669	0.0377165	0.0400538	0.00137268	0.0367542						0.0914863	0.0522797	0.00333479	0.0258904	0.0888084	0.0342949	0.0835021	0.00133748					0.0751015	0.0853207	0.00576985	0.0127671	0.0484168	0.0756107	0.025246	0.00221677
19	0.00337207	0.000425796	0.0298243	0.0123708	0.0123055	0.0522565	0.10393						0.00877423	0.0247796	0.0298997	0.0518701	0.031313	0.0269431	0.018517						0.0935167	0.000257247	0.00341721	0.0686298	0.0847882	0.00531857	0.0451517	0.04566					0.0769842	0.0142733	0.0506743	0.0508919	0.000991224	0.0201997	0.00783763	0.0207039
20	0.0149139	0.0405731	0.0842268	0.0296432	0.074722	0.0140126	0.032496						0.0337465	0.0132336	0.00767998	0.00769443	0.0884641	0.0636624	0.00219108						0.0665832	0.00309115	0.0238158	0.0368819	0.0146848	0.0494914	0.00233964	0.046864					0.0493736	0.0283695	0.0482695	0.0256053	0.00298173	0.027316	0.00394838	0.0169135
21	0.0364718	0.0384285	0.0422675	0.103622	0.0320651	0.0400966	0.00295124						0.0465591	0.0715908	0.0231965	0.0299761	0.044184	0.0367946	0.117936						0.0136214	0.0562473	0.0586562	0.00209279	0.0327228	0.0524528	0.00354056	0.00799297					0.00504928	0.0210911	0.0784768	0.0377007	0.053518	0.0594041	0.0205561	0.0264659
22	0.03742	0.0244531	0.00427353	0.0361044	0.0109155	0.00964416	0.0452942						0.0270331	0.072262	0.0450733	0.0114464	0.00489866	0.00530659	0.0388707						0.0092044	0.0546076	0.00446866	0.0499433	0.0091109	0.011166	0.00246882	0.0325986					0.048788	0.0383882	0.00198095	0.0260294	0.0413413	0.00412917	0.0306591	0.109282
23	0.0023905	0.110612	0.0429266	0.0135494	0.0316972	0.00203942	0.00762134						0.0125758	0.00481487	0.00674794	0.00382422	0.0227644	0.0198369	0.00432622						0.0312059	0.0539717	0.059525	0.0211184	0.0180331	0.0236238	0.00532759	0.00459269					0.0112524	0.00397562	0.0195587	0.000880332	0.00190186	0.0308931	0.0604221	0.0267281
24	0.00169605	0.0683975	0.0212613	0.00424835	0.0018431	0.018788	0.0314745						0.00882543	0.0300759	0.0392424	0.0341354	0.0486024	0.00018414	0.00029836						0.00751023	0.039957	0.0350543	0.00333819	0.0219149	0.0436818	0.0650076	0.0244402					0.000707072	0.0368785	0.0237714	0.00195094	0.00169233	0.00124783	0.0371503	0.0257805
1	0.0438703	0.0343514	0.0638849	0.0971702	0.0593572	0.00287721	0.00848887						0.0121086	0.0219441	0.00829139	0.00269404	0.108251	0.0383431	0.0131558						0.0138797	0.00173171	0.00290263	0.0179135	0.017981	0.000876355	0.0517783	0.0539721					0.0237325	0.00539674	0	0.0621367	0.0187043	0.0183998	0.000614091	0.00017768
2	0.0202692	0	0.00047838	0.0592207	0.000439481	0.0356156	0.00719973						0.0337337	0.0489609	0.0337993	0	0.106138	0.075054	0.0731075						0.0289924	0.0331243	0.0275761	0.0250564	0.0219019	0.0514481	0.0459794	0.0368982					0.0416739	0.0316411	0.0198874	0.00522468	0.106375	0.0326401	0.00318418	0.00699721
3	0.00691108	0.00516788	0.0379249	5.90961e-05	0.0190953	0.0142137	0						0.0180924	0.0454981	0.0490997	0	0.0106618	0.00939954	0.00461526						0.00689159	0.0386477	0.00558917	0.00424081	0.00478159	0.0269932	0.0022894	0.000339447					0.0215245	0.0620205	0.0415395	0.00768686	0.0184626	0.0075172	0.0422768	0
4	0.0289765	0.0454765	0	0.0262157	0.0533884	0.00624991	0.0152751						0.0324026	0	0.00264698	0	0.023917	0.00404272	0.0556348						0.0485051	0.00331075	0.000948978	5.52238e-05	0.0481608	0.00152229	0.000373194	0.030559					0.000759127	0.000265631	0.000259513	0.0294728	0.000177292	0.0863268	0.0152886	0.0541501
5	0	0.000680496	0	0.000134608	2.0441e-05	0.0229578	0.0283327						0.0187964	0.0184521	0.0246878	0	0.0401498	0.00012555	0.00126803						0.00974925	0.0195529	0.0274691	0.02574	0	0.036856	0.0631368	0.0298278					0.01877	0.0386937	0.00162628	0	0.0391654	0.00443167	0.000236539	0.00665031
6	0.0132245	3.11084e-05	0.000127568	0.00287601	0	0.00186468	0.000377013						0.0100798	0.00406103	0.0286843	0	0.0161368	0.0354973	0.00877365						0.00597498	0.0119108	0.00923583	0.0117094	0	0	0.0127771	0.000351052					0.0291288	0.00200552	0.000752589	0	0	0	0.0338387	0.000389204
day 28
	Intact males	Intact males	Intact males	Intact males	Intact males	Intact males	Intact males	Intact males	Intact males	Intact males	Intact males	Intact males	Castrated males	Castrated males	Castrated males	Castrated males	Castrated males	Castrated males	Castrated males	Castrated males	Castrated males	Castrated males	Castrated males	Castrated males	Intact females	Intact females	Intact females	Intact females	Intact females	Intact females	Intact females	Intact females	Intact females	Intact females	Intact females	Intact females	Ovariectomized females	Ovariectomized females	Ovariectomized females	Ovariectomized females	Ovariectomized females	Ovariectomized females	Ovariectomized females	Ovariectomized females	Ovariectomized females	Ovariectomized females	Ovariectomized females	Ovariectomized females
7	0.0382547	0.0225079	0.0555128	0.048331	0.0527868	0.0912673	0.0634867						0.0699029	0.0279214	0.0497939	0.131966	0.0552718	0.0460058	0.110895	0.111359					0.0397145	0.0450209	0.0549776	0.0519831	0.0581811	0.0701548	0.0965283	0.0730306					0.0442354	0.124285	0.11192	0.0497568	0.105103	0.116612	0.0603951
8	0.0858489	0.0899999	0.057654	0.025299	0.0469441	0.0597391	0.0454693						0.104505	0.0385811	0.0627035	0.118389	0.0582904	0.0965071	0.0851494	0.0856732					0.0370627	0.0541293	0.0386401	0.0524737	0.0461665	0.0367012	0.076587	0.0599179					0.0508967	0.103702	0.0591653	0.0634504	0.0621372	0.085583	0.0856299
9	0.124099	0.123813	0.0953113	0.0685118	0.0571656	0.0654849	0.0965821						0.115603	0.0165481	0.0762136	0.0163151	0.127184	0.082605	0.086165	0.125045					0.0678319	0.0426002	0.00676755	0.0375938	0.0660777	0.0968946	0.0720169	0.0525439					0.10492	0.0714914	0.0801072	0.140853	0.0761256	0.0875371	0.0670478
10	0.0400441	0.107427	0.0607652	0.00357745	0.000469312	0.0154133	0.0495695						0.165874	0.00124419	0.0581898	0.000684547	0.0203112	0.0872936	0.0909064	0.0783827					0.0479566	0.000744563	0.014827	0.000351426	0.0458722	0.0795754	0.0802757	0.0425914					0.101047	0.0858833	0.000653468	0.138162	0.0704091	0.22443	0.0208939
11	0.000267734	0.0161674	0.00163488	0.000872226	0.00798691	0.000636823	0.00188932						0.0245873	0.00885878	0.000839905	0.00379353	0.000682958	0.0990606	0.0221148	0.00632749					0.000541823	0.0389198	0.0470966	0.0283106	0.000267873	0.00337817	0.0410775	0.000743594					0.0311522	0.057465	0.00796524	0.000422967	0.037059	0.0551585	0.000552816
12	0.00916097	0.0169185	0.0901138	0.00184629	0.0398958	0.028103	0.00218635						0.00284462	0.00151694	0.027748	0.033191	0.0287696	0.00230176	0.0384068	0.0602203					0.00315107	0.0233477	0.0183518	0.0521188	0.0452346	0.00270375	0.00386241	0.0196708					0.000794465	0.0253801	0.0647507	0.000142751	0.00719131	0.000769791	0.0256243
13	0.0302897	0.037413	0.0489855	0.0198398	0.0435082	0.0634449	0.0749942						0.0441732	0.0730784	0.0240773	0.0276101	0.0368285	0.0645147	0.0747533	0.00298694					0.0621842	0.0697401	0.0761637	0.0277922	0.0616031	0.0525653	0.0559466	0.0491564					0.026831	0.0884762	0.0934371	0.0818653	0.0144483	0.00847954	0.0833873
14	0.0724221	0.0567981	0.0277137	0.0334855	0.0399475	0.0556483	0.0457694						0.0193877	0.000474511	0.0127355	0.0784187	0.0854311	0.0402906	0.118099	0.106935					0.117699	0.0947523	0.104696	0.0903145	0.00512354	0.0709234	0.0782799	0.0973833					0.00188685	0.101966	0.056472	0.000174474	0.0940637	0.086187	0.0485787
15	0.0165951	2.10822e-05	0.0270732	0.0214249	0.0252567	0.0267646	0.0247204						0.0232466	0.00853372	0.00451993	0.00811949	0.000898089	0.0329832	0.159691	0.0648926					0.0735667	0.0604813	0.0428007	0.0817899	0.0576058	0.0147248	0.0492028	0.100079					0.101534	0.0182983	0	0.0598816	0.0398552	0.00196593	0.0082357
16	0.00325743	0.0410207	0.0562998	0.0168911	0.0128523	0.0274626	1.83727e-05						0.0276185	0.0420895	0.04477	0.0210688	0.1125	0.0417259	0.000686748	0.00103076					0	0	0.0230361	0.0615203	0.0607127	0.00774064	0.0803753	0.0014562					0.0368153	0.00320963	0.0237015	6.34451e-05	0.00113893	0.00885852	0.036668
17	0.000736269	0	0.00161658	0.0268176	0.0333987	0.0642724	0.0347734						0.0397431	0	0.00433018	0.0684547	0.0453586	0.00118684	0.0366241	0.0411024					0.00375026	0.0783277	0.0710334	0	0	0.0185648	0.0113457	0.0514319					0.000779187	6.8533e-05	0.0188004	0	0.0111702	0	0.0469579
18	0.0319184	0.0360453	0.0457219	0	0.00767691	0.000658411	0						0	0.0298531	0	0.00485838	8.19549e-05	0	0	0.00143704					0.0533344	0.103494	4.0283e-05	2.6096e-05	0.0633537	0.0179481	0	0.00053704					0.0515741	0.0638842	0.0284568	0.0558423	4.38049e-05	0.000592147	0
19	0	0	0.0340215	0.060312	0.0225657	0.0535615	0.047573						0.0396848	0.0147883	0.000304854	0.0174655	0.0453074	0.0349057	0.0714511	0.0238127					0	0.027871	0.0719311	0.0595892	0.0191982	0.0146519	0.0535122	0.0206623					0	0.0126443	0.0402413	0	0.00520548	0	0.0016396
20	0.0400084	0.00447206	0	0	0.00240253	0.0137331	0						0.0506669	0	0	0.0697573	0.0277281	0.00194865	0.0187979	0					0.0338586	0	0.000474764	0.0567239	0	0.0748636	0.105505	0.0786076					0	0	0.0005475	0.0658455	0.102533	0.0578705	0
21	0	0.0482018	0.01727	0.0290181	0.0925836	0.0348814	0.0290901						0.000279799	0	1.86646e-05	0	0.02096	0.00137975	0.000416432	0.0955519					0.000548197	0.00127502	0	0.0414873	0.0490075	0	0.0128606	7.22939e-05					0.0421882	0.112554	0	0.0199535	0.0130247	0.0308982	0
22	0	0	0.016117	0	0.0208779	5.39681e-05	9.18634e-05						0	0	0	0	0.0825149	0.0131174	0	0.00759901					0	0.0610985	0	2.08768e-05	0	0.0435244	0	0.0659974					0.000318295	0.00118791	0.0361659	0	0	0	0.094519
23	0.0284423	1.58117e-05	0.0459719	0.000464892	0.0226432	0.0524966	0.0258228						0	0	0.00738183	0	0	0	0	0					0.0312451	0	0	0.0440778	0	0.000306831	0	0.00631022					0.0183109	0.001028	0.0189903	0	0	0	0.00941672
24	0	0.0102486	0	0.0221953	0	0.00586453	0						0.0563328	0.00261915	0.0195636	0	0.00458265	0	0.00176801	0					0	0	0	0.00281488	0.00806825	0.00245768	0.0185832	0.0390146					0.023396	0.0445922	0.0106983	0	0.0361829	0.00968752	0.0261268
1	0.00176705	0.00219255	0.000628332	0	0.000310004	0.0406236	0.00027559						0.000804421	0.0348074	0.00178246	0.038078	0	0.000971055	0	0					0.00275373	0.000335632	0.0836879	0	0.051141	0.034684	0.0463298	0.0213026					0.000435428	0	0.0162175	0	0.000657074	0.0281566	0.003386
2	0	0.00218728	0.00695436	0.00450724	0.012525	0.000982219	0.00464216						0	0.0005866	0.0285474	6.65532e-05	0.000228791	0.000814117	0.036646	0.0372126					0.118532	0.0162145	0.103156	0.0470475	0.000550837	0.00291033	8.6867e-05	0					0.000445614	0.00943471	0	0.0628847	0	5.32932e-05	0.00198511
3	0.000807664	0.0431527	0.0535242	0.0979195	0.0169081	0.0299199	0.0360441						0.0121246	0.00760338	0.136849	0.00447808	0.000464411	0.000336763	0	0.00353617					0.109104	0.10746	0.000759623	0	0.0183719	0.000811126	0.000222464	0.106093					0.068869	0.0104627	0.026227	0	0.00843244	0.0239938	0.00974338
4	0.0645329	0.00717059	0.0337957	0.0787261	0.0597576	0.095009	0.158228						0.0292856	0.196291	0.0844571	0.0505424	0.0363265	0.056282	0.00103012	0.0249865					0.00926836	0.0409722	0	0.0699458	0.105225	0.0890781	0.0252232	0.0163832					4.32882e-05	0.00260426	0.000331149	0.0097864	0.00462872	0.0107593	0.0116028
5	0.175174	0.144866	0.068476	0.166746	0.178713	0.0437645	0.15076						0.0173708	0.225064	0.202209	0.098841	0.0760849	0.122529	0.0122519	0.0829722					0.0255889	5.20809e-05	0.107176	0.116285	0.126083	0.121183	0.0905726	0					0.103336	0.00261568	0.149856	0.0321508	0.0745195	0.0321417	0.20005
6	0.236373	0.18936	0.154838	0.273215	0.202824	0.130214	0.108013						0.155965	0.269541	0.152965	0.207903	0.134194	0.17324	0.0341475	0.0389355					0.162309	0.133163	0.134384	0.0777329	0.112156	0.143654	0.00160598	0.097015					0.19019	0.0587671	0.155296	0.218764	0.236072	0.130266	0.157559
day 35
	Intact males	Intact males	Intact males	Intact males	Intact males	Intact males	Intact males	Intact males	Intact males	Intact males	Intact males	Intact males	Castrated males	Castrated males	Castrated males	Castrated males	Castrated males	Castrated males	Castrated males	Castrated males	Castrated males	Castrated males	Castrated males	Castrated males	Intact females	Intact females	Intact females	Intact females	Intact females	Intact females	Intact females	Intact females	Intact females	Intact females	Intact females	Intact females	Ovariectomized females	Ovariectomized females	Ovariectomized females	Ovariectomized females	Ovariectomized females	Ovariectomized females	Ovariectomized females	Ovariectomized females	Ovariectomized females	Ovariectomized females	Ovariectomized females	Ovariectomized females
7	0.0824431	0.0372423	0.0792144	0.0329085	0.073853	0.0684149	0.0781112						0.0693824	0.0677372	0.0722108	0.111518	0.0511817	0.0234342	0.102012	0.0634462					0.0814563	0.0658008	0.0998127	0.0381577	0.0499983	0.0714281	0.0597897	0.0709376					0.0437382	0.0560884	0.158254	0.0827156	0.0990479	0.102396	0.102026
8	0.116145	0.0366327	0.0654405	0.0397487	0.0424641	0.0503757	0.0609789						0.0918696	0.0653738	0.0583471	0.0864479	0.0492961	0.0799889	0.0873944	0.0547165					0.0538844	0.0568078	0.0846998	0.034012	0.0450628	0.0493972	0.0727388	0.0603895					0.039778	0.0548793	0.169533	0.0633437	0.072707	0.0739753	0.0874624
9	0.0795565	0.100502	0.10839	0.0984292	0.0861449	0.0109131	0.0487395						0.117739	0.0815374	0.0788301	0.0467945	0.0939616	0.0671798	0.137388	0.0844608					0.0313219	0.0584012	0.0356683	0.0298669	0.0417548	0.0560638	0.0619851	0.0482744					0.095786	0.0751907	0.107319	0.0851201	0.0797888	0.0638819	0.113826
10	0.107211	0.103691	0.104709	0.00860036	0.0504307	0.00547726	0.0216575						0.144806	0.0174742	0.0476498	0.00770574	0.114978	0.0286387	0.0932489	0.0722812					0.0157453	0.00953527	0.0175459	0.0276675	0.0385432	0.00974996	0.0398493	0.0147898					0.0881298	0.0143023	0.173477	0.0288685	0.156036	0.0991067	0.028641
11	0.0499104	0.0643623	0.00778294	0.00130995	0.0280094	0.0124791	0.000677139						0.116118	0.00584444	0.0161347	0.00369014	0.00730676	0.0151069	0.00231913	0					0.00323338	0.0772448	0.0242275	0.0311364	0.00726198	0.000233165	0.000490855	0.00885493					0.00305741	0.000441126	0.05092	0.00086032	0.0366882	0.0139416	0.0098167
12	0.00342466	0.00219544	0.00109289	0.013753	0.00740642	0.0216116	0.00551905						0.0013154	0.00828857	0.0471496	0.0484361	0.0238992	0.0288685	0.0176315	0.0298038					0.0130864	0.0562906	0.00804537	0.00674848	0.0857459	0.0656358	0.0522896	0.046073					0.00690771	0.0651657	0	0.0499316	0.00209775	0.0171556	0.00421739
13	0.00351487	0.0669681	0.0642856	0.0118099	0.0745601	0.0207872	0.0951454						0.0230161	0.023931	0.0111773	0.0380884	0.0543587	0.091461	0.103394	0.128814					0.0643804	0.0257227	0.0892889	0.0188897	0.0824566	0.000380427	0.0841681	0.0488739					0.0038059	0.126103	0.103875	0.0246478	0.125374	0.0519558	0.0206573
14	0.037929	0.0269306	0.0125837	0.0310031	0.0603764	0.0433249	0.0561662						0.0720967	0.0641599	0.0531759	0.101007	0.10885	0.178689	0.130989	0.0575395					0.119145	0.0595508	0.0576687	0.0437929	0.0755084	0.0749133	0.101267	0.0724449					0.0785136	0.0202591	0.00413246	0.0882416	0.0507997	0.120707	0.0605256
15	0.0165853	0.0319067	0.0402377	0.0157688	0.00394887	0.0387888	0.00571928						0.0425801	6.98324e-05	0.00019765	0.00981166	0.0561806	0.0276282	0.000113313	0					0.0320914	0.108909	0	0.0410346	0.0875148	0.0397454	0.099612	0.00253799					0.089354	0.102982	0.0245913	0.0226477	0.0372387	0.000456837	0.0113275
16	0.10897	0.00284144	0.0261894	0.0179501	0.0402188	0.0138607	0.0555946						6.95981e-05	0.0327031	0	0.0545864	0.00215569	1.66102e-05	0.0142623	0					0.0304365	0.101611	0.0191712	0.043957	0.0574249	0.00107379	0.0378386	0.000655531					0.00114177	0.116186	0	0.0266515	0.0489251	0.00406854	0.0669627
17	0.0861641	0.0305394	0	0.0281509	0.00443559	0.04139	0.000109216						0.0287927	0	0.0329874	8.1365e-05	0.0666644	0.00971971	0.0148666	0.0234623					0.0155582	0.0430631	0.0644849	0.0484217	3.72728e-05	0.0761927	2.47679e-05	0.0920127					0.0448293	0	0.0292403	0	0.000133899	0	0.0686811
18	0.000415598	0.00719832	0.0855991	0.0242442	0.0819665	0	0.0624497						0	0.0246616	0.00148036	0.0126546	0.0277048	0.00659423	0.00447208	0.000160137					0.00872776	6.00647e-05	0.00291289	0.0461597	0.0318449	0.0385734	0.0596772	0.00257655					0	0.0347542	0.0776793	0.0680314	0.0474448	0.0360203	0.0129457
19	0.0228064	0.0329024	5.30957e-05	0.0320313	0.00861404	0.0437239	0						0.0454546	0.0055275	0.0354883	0.045933	2.94627e-05	0.0223268	0.0150479	0.00691791					0.0128044	0.000393757	0	0.0438437	0.0484236	0.0425648	0.0795297	0.0816329					0.0394799	0	0.00122878	0.00258464	0.0128989	0.00275715	0.0717958
20	0.034659	0.0306973	0.0641618	0	0.0216407	0.00245441	0.0327794						0.00452388	0.00096691	0	0.000397253	0.0726895	0.000238079	0.00855889	0.0493862					0	0.0713201	0.108468	0.0440032	0	0.0292499	0.000312976	0.0301124					4.22878e-05	0.000215662	8.60929e-05	0.0540862	0.00780332	0.0258623	0.088558
21	9.34291e-05	0	0.00793781	0.0317002	0.0354066	0.0445973	0.026048						0.000132236	0.0590675	0	0.000646134	0	0.0286996	0.0517689	0					0	0.00322013	0.0421392	0.0436123	0.0220546	0	0.0401848	0.0477521					0	0.0668061	0.0377478	0.0124342	0.0129138	0.0738141	0.0182873
22	0.0365372	0.0123348	0.0742322	0.0125622	0.0271875	0	0.0354661						0.0853621	3.22303e-05	0	0.0723766	0.000171866	0.000459548	0.000317276	0.0254663					0	0	0	0.0447117	0.0200031	0.0372757	0.0405203	0.0325277					0.00747859	0	0	0	0.0215503	0	0
23	0.000173971	0	0	0.020509	0.00743856	0.0536847	0.0254073						0.00115533	0.0178932	0	0	0	0	0	0					0.05258	0.0106782	0.0672073	0.0486445	0	0	0.000330989	0.018418					0.043364	0.0248632	0	0.0458469	4.46329e-05	0	0.0360161
24	0.0133861	0.0101709	0.0509675	0.00263442	5.51005e-05	0.0405769	0.00266851						0.00186523	0	0.00012101	0.00986431	0	0.000204859	0.0315009	0.00113468					0.00468274	0.0710582	0.0167459	0.0550542	0.0240736	0.0130664	0.0327139	0.0727007					0.00106142	0	9.39195e-05	0.000610312	0	0	0.00350136
1	3.22169e-05	0.000247715	0.00133624	0.00035145	0.00120762	0.00184834	0.00160184						0.00312496	0.0059465	0.00783339	2.87171e-05	0.062353	0.00273791	0.0408832	0					0.0164884	0	0.000921865	0.0532635	0.00651342	0.0146802	0.00389082	0.000105165					0.014437	0.0325551	0.04451	0.000330892	0	0.0568198	0.00496921
2	0.00188469	0.0148945	0.00116368	0.00143194	0.000280094	0.0502251	0.00696798						0.000306232	0	7.26061e-05	0.00410175	8.83882e-05	0.00984705	0.0253972	0.00863824					0	0	0.010364	0.0549594	0	0.000478601	0	0.03434					0.0205582	0	0	0.0187395	0	0	0.00208363
3	0.0375134	0.0122376	0.0366803	0.0645187	0.00360908	0.0292308	0.0234305						0	0.0317469	0.00197247	0.0127839	0.0015026	0.00482525	0.00265907	0.000732054					0.000418996	0.0326552	0.0823329	0.0539872	0.000396023	0.000220893	0.0306357	0.000757191					0	0.0240201	0	0.000242654	0.0341591	0.000161237	0.0357153
4	0.00147231	0.0817704	0.0219329	0.169744	0.0475471	0.0108303	0.00771793						0.0189446	0	0.177223	0.0321105	0.000289717	0.0449277	0.0203736	0.059333					0.0830824	0	0.000137137	0.0547234	0.0299456	0.103476	4.05293e-05	0.0156381					0.0776784	0.0811149	0.000547864	0.0368908	0.00377148	0.0368372	0.0155521
5	0.0315822	0.131959	0.0532727	0.191136	0.112947	0.205064	0.168185						0.0275817	0.192662	0.178542	0.116582	0.0852505	0.14571	0.0462014	0.121306					0.172816	0.0216416	0.0476907	0.0548749	0.124851	0.14439	0.0032536	0.0880445					0.14411	0	0	0.154582	0.00643458	0.000247229	0.111507
6	0.127589	0.161775	0.0927361	0.149703	0.180252	0.190341	0.178859						0.103764	0.294376	0.179406	0.184354	0.121087	0.182698	0.0492004	0.212401					0.18806	0.126036	0.120467	0.0384773	0.120585	0.13121	0.0988555	0.109551					0.156748	0.104073	0.0167646	0.132592	0.144142	0.219835	0.0249248
normalized
day -7
	Intact males	Intact males	Intact males	Intact males	Intact males	Intact males	Intact males	Intact males	Intact males	Intact males	Intact males	Intact males	Castrated males	Castrated males	Castrated males	Castrated males	Castrated males	Castrated males	Castrated males	Castrated males	Castrated males	Castrated males	Castrated males	Castrated males	Intact females	Intact females	Intact females	Intact females	Intact females	Intact females	Intact females	Intact females	Intact females	Intact females	Intact females	Intact females	Ovariectomized females	Ovariectomized females	Ovariectomized females	Ovariectomized females	Ovariectomized females	Ovariectomized females	Ovariectomized females	Ovariectomized females	Ovariectomized females	Ovariectomized females	Ovariectomized females	Ovariectomized females
7	0.153633	0.0711156	0.135796	0.134207	0.0964643	0.108486	0.134014						0.0996013	0.143867	0.141647	0.149664	0.0718471	0.100197	0.124435						0.0619392	0.0883362	0.064506	0.0806419	0.057231	0.101177	0.0872724	0.11124					0.144004	0.108909	0.140449	0.087914	0.0818525	0.128586	0.110068	0.110728
8	0.0797278	0.0157486	0.0371595	0.0232576	0.012653	0.0231685	0.0607437						0.0281723	0.0309951	0.0113634	0.0405157	0.0226683	0.0652108	0.0370153						0.0185791	0.0449681	0.0028358	0.0292991	0.0199951	0.0618057	0.0581776	0.0499713					0.0879806	0.0987394	0.0244635	0.0135397	0.0896937	0.0698177	0.0839304	0.0779169
9	0.055282	0.0133086	0.00550669	0.0133459	0.0128131	0.00520866	0.000141887						0.0601332	0.000817069	0.0400999	0.0354561	0.00355393	0.055895	0.0747298						0.00275124	0.00485633	0.0125773	0.0132785	0.000520622	0.00176026	0.0442402	0.00203668					0.0145232	0.00990805	0.0530099	0.00471115	0.00224839	0.0129698	0.0756924	0.0381166
10	0.0044705	0.000322749	0.0117947	0.00984606	0.0107043	0.0160592	0.027676						0.0173693	0.0957965	0.0172762	0.0281691	0.0084526	0.0300233	0.00167827						0.00380265	0.00648138	0.0131543	0.026974	0.00189865	0.00915262	0	0.006229					0.000780816	0.0158006	0.0176469	0.0154448	0.0633175	0.0286244	0.000313869	0.00791945
11	0.0164397	0.00931113	0.0403434	0.0526218	0.00799583	0.00486397	0.00503495						0.0256955	0	0.0673452	0.0726076	0.00681971	0.0311365	0.0290248						0.00572384	0.0107166	0.0802911	0.0512096	0.00565201	0.0174969	0.00280374	0.0499626					0.0433049	0.00569779	0.125665	0.0405434	0.012346	0.037465	0.0330381	0.0339707
12	0.0245093	0.0367351	0.0453824	0.064418	0.0790248	0.0642657	0.0464618						0.0519478	0.0388448	0.0817433	0.0794675	0.0329459	0.070191	0.0426935						0.0271549	0.0354897	0.122911	0.0865205	0.0824227	0.105453	0.0189109	0.036817					0.0565268	0.0625961	0.0429668	0.0983267	0.0353698	0.052991	0.01472	0.0833066
13	0.0480838	0.0895397	0.0844819	0.0666111	0.00488539	0.143473	0.0589681						0.0567989	0.0718097	0.105439	0.139577	0.0291999	0.0497347	0.107615						0.0884187	0.0709501	0.12633	0.104691	0.0807095	0.0696476	0.055472	0.0929853					0.0739477	0.0387158	0.0640393	0.134051	0.0969949	0.0339484	0.0823838	0.0981725
14	0.0862016	0.0926505	0.0661015	0.0632558	0.0986107	0.12585	0.130572						0.0788081	0.0542087	0.0982292	0.111007	0.0195947	0.0962051	0.0965754						0.0867174	0.0711488	0.104011	0.1182	0.0880291	0.0118119	0.0648282	0.103639					0.0544576	0.0575447	0.12781	0.140548	0.0437912	0.0171595	0.0723218	0.0749387
15	0.109199	0.084747	0.0866825	0.0722055	0.105561	0.133565	0.132745						0.0833264	0.0926255	0.01237	0.116304	0.106522	0.0823024	0.0636719						0.091265	0.103288	0.0999389	0.0865699	0.0999156	0.0465979	0.0791531	0.11764					0.0885403	0.0841697	0.0900251	0.120193	0.0655739	0.056863	0.0796953	0.108207
16	0.11864	0.0918261	0.0859383	0.024955	0.116159	0.104192	0.0759255						0.0870127	0.078035	0.0406442	0	0.111901	0.0506972	0.00531454						0.0921575	0.105421	0.0899257	0.0792156	0.100225	0.145025	0.108712	0.0805912					0.0206005	0.0737215	0.0199652	0.0380583	0.070667	0.11477	0.0961667	0.0432693
17	0.0798682	0.100781	0.044787	0.00469157	0.112936	0.017797	0.0372351						0.0921582	0.0189628	0.028826	0.047875	0.000960523	0.0518439	0.0417984						0.0943695	0.0896539	0.0215258	0.0307901	0.100513	0.0923459	0.0967578	0.0334544					0.0124887	0.0758776	0.00139272	0.0463229	0.104417	0.0786887	0.0704112	0.0269989
18	0.0144298	0.0253164	0.0288304	0.0853708	0.0463431	0.0324536	0.00704163						0.0562485	0.0183646	0.0559669	0.0377165	0.0400538	0.00137268	0.0367542						0.0914863	0.0522797	0.00333479	0.0258904	0.0888084	0.0342949	0.0835021	0.00133748					0.0751015	0.0853207	0.00576985	0.0127671	0.0484168	0.0756107	0.025246	0.00221677
19	0.00337207	0.000425796	0.0298243	0.0123708	0.0123055	0.0522565	0.10393						0.00877423	0.0247796	0.0298997	0.0518701	0.031313	0.0269431	0.018517						0.0935167	0.000257247	0.00341721	0.0686298	0.0847882	0.00531857	0.0451517	0.04566					0.0769842	0.0142733	0.0506743	0.0508919	0.000991224	0.0201997	0.00783763	0.0207039
20	0.0149139	0.0405731	0.0842268	0.0296432	0.074722	0.0140126	0.032496						0.0337465	0.0132336	0.00767998	0.00769443	0.0884641	0.0636624	0.00219108						0.0665832	0.00309115	0.0238158	0.0368819	0.0146848	0.0494914	0.00233964	0.046864					0.0493736	0.0283695	0.0482695	0.0256053	0.00298173	0.027316	0.00394838	0.0169135
21	0.0364718	0.0384285	0.0422675	0.103622	0.0320651	0.0400966	0.00295124						0.0465591	0.0715908	0.0231965	0.0299761	0.044184	0.0367946	0.117936						0.0136214	0.0562473	0.0586562	0.00209279	0.0327228	0.0524528	0.00354056	0.00799297					0.00504928	0.0210911	0.0784768	0.0377007	0.053518	0.0594041	0.0205561	0.0264659
22	0.03742	0.0244531	0.00427353	0.0361044	0.0109155	0.00964416	0.0452942						0.0270331	0.072262	0.0450733	0.0114464	0.00489866	0.00530659	0.0388707						0.0092044	0.0546076	0.00446866	0.0499433	0.0091109	0.011166	0.00246882	0.0325986					0.048788	0.0383882	0.00198095	0.0260294	0.0413413	0.00412917	0.0306591	0.109282
23	0.0023905	0.110612	0.0429266	0.0135494	0.0316972	0.00203942	0.00762134						0.0125758	0.00481487	0.00674794	0.00382422	0.0227644	0.0198369	0.00432622						0.0312059	0.0539717	0.059525	0.0211184	0.0180331	0.0236238	0.00532759	0.00459269					0.0112524	0.00397562	0.0195587	0.000880332	0.00190186	0.0308931	0.0604221	0.0267281
24	0.00169605	0.0683975	0.0212613	0.00424835	0.0018431	0.018788	0.0314745						0.00882543	0.0300759	0.0392424	0.0341354	0.0486024	0.00018414	0.00029836						0.00751023	0.039957	0.0350543	0.00333819	0.0219149	0.0436818	0.0650076	0.0244402					0.000707072	0.0368785	0.0237714	0.00195094	0.00169233	0.00124783	0.0371503	0.0257805
1	0.0438703	0.0343514	0.0638849	0.0971702	0.0593572	0.00287721	0.00848887						0.0121086	0.0219441	0.00829139	0.00269404	0.108251	0.0383431	0.0131558						0.0138797	0.00173171	0.00290263	0.0179135	0.017981	0.000876355	0.0517783	0.0539721					0.0237325	0.00539674	0	0.0621367	0.0187043	0.0183998	0.000614091	0.00017768
2	0.0202692	0	0.00047838	0.0592207	0.000439481	0.0356156	0.00719973						0.0337337	0.0489609	0.0337993	0	0.106138	0.075054	0.0731075						0.0289924	0.0331243	0.0275761	0.0250564	0.0219019	0.0514481	0.0459794	0.0368982					0.0416739	0.0316411	0.0198874	0.00522468	0.106375	0.0326401	0.00318418	0.00699721
3	0.00691108	0.00516788	0.0379249	5.90961e-05	0.0190953	0.0142137	0						0.0180924	0.0454981	0.0490997	0	0.0106618	0.00939954	0.00461526						0.00689159	0.0386477	0.00558917	0.00424081	0.00478159	0.0269932	0.0022894	0.000339447					0.0215245	0.0620205	0.0415395	0.00768686	0.0184626	0.0075172	0.0422768	0
4	0.0289765	0.0454765	0	0.0262157	0.0533884	0.00624991	0.0152751						0.0324026	0	0.00264698	0	0.023917	0.00404272	0.0556348						0.0485051	0.00331075	0.000948978	5.52238e-05	0.0481608	0.00152229	0.000373194	0.030559					0.000759127	0.000265631	0.000259513	0.0294728	0.000177292	0.0863268	0.0152886	0.0541501
5	0	0.000680496	0	0.000134608	2.0441e-05	0.0229578	0.0283327						0.0187964	0.0184521	0.0246878	0	0.0401498	0.00012555	0.00126803						0.00974925	0.0195529	0.0274691	0.02574	0	0.036856	0.0631368	0.0298278					0.01877	0.0386937	0.00162628	0	0.0391654	0.00443167	0.000236539	0.00665031
6	0.0132245	3.11084e-05	0.000127568	0.00287601	0	0.00186468	0.000377013						0.0100798	0.00406103	0.0286843	0	0.0161368	0.0354973	0.00877365						0.00597498	0.0119108	0.00923583	0.0117094	0	0	0.0127771	0.000351052					0.0291288	0.00200552	0.000752589	0	0	0	0.0338387	0.000389204
day 28
	Intact males	Intact males	Intact males	Intact males	Intact males	Intact males	Intact males	Intact males	Intact males	Intact males	Intact males	Intact males	Castrated males	Castrated males	Castrated males	Castrated males	Castrated males	Castrated males	Castrated males	Castrated males	Castrated males	Castrated males	Castrated males	Castrated males	Intact females	Intact females	Intact females	Intact females	Intact females	Intact females	Intact females	Intact females	Intact females	Intact females	Intact females	Intact females	Ovariectomized females	Ovariectomized females	Ovariectomized females	Ovariectomized females	Ovariectomized females	Ovariectomized females	Ovariectomized females	Ovariectomized females	Ovariectomized females	Ovariectomized females	Ovariectomized females	Ovariectomized females
7	0.0382547	0.0225079	0.0555128	0.048331	0.0527868	0.0912673	0.0634867						0.0699029	0.0279214	0.0497939	0.131966	0.0552718	0.0460058	0.110895	0.111359					0.0397145	0.0450209	0.0549776	0.0519831	0.0581811	0.0701548	0.0965283	0.0730306					0.0442354	0.124285	0.11192	0.0497568	0.105103	0.116612	0.0603951
8	0.0858489	0.0899999	0.057654	0.025299	0.0469441	0.0597391	0.0454693						0.104505	0.0385811	0.0627035	0.118389	0.0582904	0.0965071	0.0851494	0.0856732					0.0370627	0.0541293	0.0386401	0.0524737	0.0461665	0.0367012	0.076587	0.0599179					0.0508967	0.103702	0.0591653	0.0634504	0.0621372	0.085583	0.0856299
9	0.124099	0.123813	0.0953113	0.0685118	0.0571656	0.0654849	0.0965821						0.115603	0.0165481	0.0762136	0.0163151	0.127184	0.082605	0.086165	0.125045					0.0678319	0.0426002	0.00676755	0.0375938	0.0660777	0.0968946	0.0720169	0.0525439					0.10492	0.0714914	0.0801072	0.140853	0.0761256	0.0875371	0.0670478
10	0.0400441	0.107427	0.0607652	0.00357745	0.000469312	0.0154133	0.0495695						0.165874	0.00124419	0.0581898	0.000684547	0.0203112	0.0872936	0.0909064	0.0783827					0.0479566	0.000744563	0.014827	0.000351426	0.0458722	0.0795754	0.0802757	0.0425914					0.101047	0.0858833	0.000653468	0.138162	0.0704091	0.22443	0.0208939
11	0.000267734	0.0161674	0.00163488	0.000872226	0.00798691	0.000636823	0.00188932						0.0245873	0.00885878	0.000839905	0.00379353	0.000682958	0.0990606	0.0221148	0.00632749					0.000541823	0.0389198	0.0470966	0.0283106	0.000267873	0.00337817	0.0410775	0.000743594					0.0311522	0.057465	0.00796524	0.000422967	0.037059	0.0551585	0.000552816
12	0.00916097	0.0169185	0.0901138	0.00184629	0.0398958	0.028103	0.00218635						0.00284462	0.00151694	0.027748	0.033191	0.0287696	0.00230176	0.0384068	0.0602203					0.00315107	0.0233477	0.0183518	0.0521188	0.0452346	0.00270375	0.00386241	0.0196708					0.000794465	0.0253801	0.0647507	0.000142751	0.00719131	0.000769791	0.0256243
13	0.0302897	0.037413	0.0489855	0.0198398	0.0435082	0.0634449	0.0749942						0.0441732	0.0730784	0.0240773	0.0276101	0.0368285	0.0645147	0.0747533	0.00298694					0.0621842	0.0697401	0.0761637	0.0277922	0.0616031	0.0525653	0.0559466	0.0491564					0.026831	0.0884762	0.0934371	0.0818653	0.0144483	0.00847954	0.0833873
14	0.0724221	0.0567981	0.0277137	0.0334855	0.0399475	0.0556483	0.0457694						0.0193877	0.000474511	0.0127355	0.0784187	0.0854311	0.0402906	0.118099	0.106935					0.117699	0.0947523	0.104696	0.0903145	0.00512354	0.0709234	0.0782799	0.0973833					0.00188685	0.101966	0.056472	0.000174474	0.0940637	0.086187	0.0485787
15	0.0165951	2.10822e-05	0.0270732	0.0214249	0.0252567	0.0267646	0.0247204						0.0232466	0.00853372	0.00451993	0.00811949	0.000898089	0.0329832	0.159691	0.0648926					0.0735667	0.0604813	0.0428007	0.0817899	0.0576058	0.0147248	0.0492028	0.100079					0.101534	0.0182983	0	0.0598816	0.0398552	0.00196593	0.0082357
16	0.00325743	0.0410207	0.0562998	0.0168911	0.0128523	0.0274626	1.83727e-05						0.0276185	0.0420895	0.04477	0.0210688	0.1125	0.0417259	0.000686748	0.00103076					0	0	0.0230361	0.0615203	0.0607127	0.00774064	0.0803753	0.0014562					0.0368153	0.00320963	0.0237015	6.34451e-05	0.00113893	0.00885852	0.036668
17	0.000736269	0	0.00161658	0.0268176	0.0333987	0.0642724	0.0347734						0.0397431	0	0.00433018	0.0684547	0.0453586	0.00118684	0.0366241	0.0411024					0.00375026	0.0783277	0.0710334	0	0	0.0185648	0.0113457	0.0514319					0.000779187	6.8533e-05	0.0188004	0	0.0111702	0	0.0469579
18	0.0319184	0.0360453	0.0457219	0	0.00767691	0.000658411	0						0	0.0298531	0	0.00485838	8.19549e-05	0	0	0.00143704					0.0533344	0.103494	4.0283e-05	2.6096e-05	0.0633537	0.0179481	0	0.00053704					0.0515741	0.0638842	0.0284568	0.0558423	4.38049e-05	0.000592147	0
19	0	0	0.0340215	0.060312	0.0225657	0.0535615	0.047573						0.0396848	0.0147883	0.000304854	0.0174655	0.0453074	0.0349057	0.0714511	0.0238127					0	0.027871	0.0719311	0.0595892	0.0191982	0.0146519	0.0535122	0.0206623					0	0.0126443	0.0402413	0	0.00520548	0	0.0016396
20	0.0400084	0.00447206	0	0	0.00240253	0.0137331	0						0.0506669	0	0	0.0697573	0.0277281	0.00194865	0.0187979	0					0.0338586	0	0.000474764	0.0567239	0	0.0748636	0.105505	0.0786076					0	0	0.0005475	0.0658455	0.102533	0.0578705	0
21	0	0.0482018	0.01727	0.0290181	0.0925836	0.0348814	0.0290901						0.000279799	0	1.86646e-05	0	0.02096	0.00137975	0.000416432	0.0955519					0.000548197	0.00127502	0	0.0414873	0.0490075	0	0.0128606	7.22939e-05					0.0421882	0.112554	0	0.0199535	0.0130247	0.0308982	0
22	0	0	0.016117	0	0.0208779	5.39681e-05	9.18634e-05						0	0	0	0	0.0825149	0.0131174	0	0.00759901					0	0.0610985	0	2.08768e-05	0	0.0435244	0	0.0659974					0.000318295	0.00118791	0.0361659	0	0	0	0.094519
23	0.0284423	1.58117e-05	0.0459719	0.000464892	0.0226432	0.0524966	0.0258228						0	0	0.00738183	0	0	0	0	0					0.0312451	0	0	0.0440778	0	0.000306831	0	0.00631022					0.0183109	0.001028	0.0189903	0	0	0	0.00941672
24	0	0.0102486	0	0.0221953	0	0.00586453	0						0.0563328	0.00261915	0.0195636	0	0.00458265	0	0.00176801	0					0	0	0	0.00281488	0.00806825	0.00245768	0.0185832	0.0390146					0.023396	0.0445922	0.0106983	0	0.0361829	0.00968752	0.0261268
1	0.00176705	0.00219255	0.000628332	0	0.000310004	0.0406236	0.00027559						0.000804421	0.0348074	0.00178246	0.038078	0	0.000971055	0	0					0.00275373	0.000335632	0.0836879	0	0.051141	0.034684	0.0463298	0.0213026					0.000435428	0	0.0162175	0	0.000657074	0.0281566	0.003386
2	0	0.00218728	0.00695436	0.00450724	0.012525	0.000982219	0.00464216						0	0.0005866	0.0285474	6.65532e-05	0.000228791	0.000814117	0.036646	0.0372126					0.118532	0.0162145	0.103156	0.0470475	0.000550837	0.00291033	8.6867e-05	0					0.000445614	0.00943471	0	0.0628847	0	5.32932e-05	0.00198511
3	0.000807664	0.0431527	0.0535242	0.0979195	0.0169081	0.0299199	0.0360441						0.0121246	0.00760338	0.136849	0.00447808	0.000464411	0.000336763	0	0.00353617					0.109104	0.10746	0.000759623	0	0.0183719	0.000811126	0.000222464	0.106093					0.068869	0.0104627	0.026227	0	0.00843244	0.0239938	0.00974338
4	0.0645329	0.00717059	0.0337957	0.0787261	0.0597576	0.095009	0.158228						0.0292856	0.196291	0.0844571	0.0505424	0.0363265	0.056282	0.00103012	0.0249865					0.00926836	0.0409722	0	0.0699458	0.105225	0.0890781	0.0252232	0.0163832					4.32882e-05	0.00260426	0.000331149	0.0097864	0.00462872	0.0107593	0.0116028
5	0.175174	0.144866	0.068476	0.166746	0.178713	0.0437645	0.15076						0.0173708	0.225064	0.202209	0.098841	0.0760849	0.122529	0.0122519	0.0829722					0.0255889	5.20809e-05	0.107176	0.116285	0.126083	0.121183	0.0905726	0					0.103336	0.00261568	0.149856	0.0321508	0.0745195	0.0321417	0.20005
6	0.236373	0.18936	0.154838	0.273215	0.202824	0.130214	0.108013						0.155965	0.269541	0.152965	0.207903	0.134194	0.17324	0.0341475	0.0389355					0.162309	0.133163	0.134384	0.0777329	0.112156	0.143654	0.00160598	0.097015					0.19019	0.0587671	0.155296	0.218764	0.236072	0.130266	0.157559
day 35
	Intact males	Intact males	Intact males	Intact males	Intact males	Intact males	Intact males	Intact males	Intact males	Intact males	Intact males	Intact males	Castrated males	Castrated males	Castrated males	Castrated males	Castrated males	Castrated males	Castrated males	Castrated males	Castrated males	Castrated males	Castrated males	Castrated males	Intact females	Intact females	Intact females	Intact females	Intact females	Intact females	Intact females	Intact females	Intact females	Intact females	Intact females	Intact females	Ovariectomized females	Ovariectomized females	Ovariectomized females	Ovariectomized females	Ovariectomized females	Ovariectomized females	Ovariectomized females	Ovariectomized females	Ovariectomized females	Ovariectomized females	Ovariectomized females	Ovariectomized females
7	0.0824431	0.0372423	0.0792144	0.0329085	0.073853	0.0684149	0.0781112						0.0693824	0.0677372	0.0722108	0.111518	0.0511817	0.0234342	0.102012	0.0634462					0.0814563	0.0658008	0.0998127	0.0381577	0.0499983	0.0714281	0.0597897	0.0709376					0.0437382	0.0560884	0.158254	0.0827156	0.0990479	0.102396	0.102026
8	0.116145	0.0366327	0.0654405	0.0397487	0.0424641	0.0503757	0.0609789						0.0918696	0.0653738	0.0583471	0.0864479	0.0492961	0.0799889	0.0873944	0.0547165					0.0538844	0.0568078	0.0846998	0.034012	0.0450628	0.0493972	0.0727388	0.0603895					0.039778	0.0548793	0.169533	0.0633437	0.072707	0.0739753	0.0874624
9	0.0795565	0.100502	0.10839	0.0984292	0.0861449	0.0109131	0.0487395						0.117739	0.0815374	0.0788301	0.0467945	0.0939616	0.0671798	0.137388	0.0844608					0.0313219	0.0584012	0.0356683	0.0298669	0.0417548	0.0560638	0.0619851	0.0482744					0.095786	0.0751907	0.107319	0.0851201	0.0797888	0.0638819	0.113826
10	0.107211	0.103691	0.104709	0.00860036	0.0504307	0.00547726	0.0216575						0.144806	0.0174742	0.0476498	0.00770574	0.114978	0.0286387	0.0932489	0.0722812					0.0157453	0.00953527	0.0175459	0.0276675	0.0385432	0.00974996	0.0398493	0.0147898					0.0881298	0.0143023	0.173477	0.0288685	0.156036	0.0991067	0.028641
11	0.0499104	0.0643623	0.00778294	0.00130995	0.0280094	0.0124791	0.000677139						0.116118	0.00584444	0.0161347	0.00369014	0.00730676	0.0151069	0.00231913	0					0.00323338	0.0772448	0.0242275	0.0311364	0.00726198	0.000233165	0.000490855	0.00885493					0.00305741	0.000441126	0.05092	0.00086032	0.0366882	0.0139416	0.0098167
12	0.00342466	0.00219544	0.00109289	0.013753	0.00740642	0.0216116	0.00551905						0.0013154	0.00828857	0.0471496	0.0484361	0.0238992	0.0288685	0.0176315	0.0298038					0.0130864	0.0562906	0.00804537	0.00674848	0.0857459	0.0656358	0.0522896	0.046073					0.00690771	0.0651657	0	0.0499316	0.00209775	0.0171556	0.00421739
13	0.00351487	0.0669681	0.0642856	0.0118099	0.0745601	0.0207872	0.0951454						0.0230161	0.023931	0.0111773	0.0380884	0.0543587	0.091461	0.103394	0.128814					0.0643804	0.0257227	0.0892889	0.0188897	0.0824566	0.000380427	0.0841681	0.0488739					0.0038059	0.126103	0.103875	0.0246478	0.125374	0.0519558	0.0206573
14	0.037929	0.0269306	0.0125837	0.0310031	0.0603764	0.0433249	0.0561662						0.0720967	0.0641599	0.0531759	0.101007	0.10885	0.178689	0.130989	0.0575395					0.119145	0.0595508	0.0576687	0.0437929	0.0755084	0.0749133	0.101267	0.0724449					0.0785136	0.0202591	0.00413246	0.0882416	0.0507997	0.120707	0.0605256
15	0.0165853	0.0319067	0.0402377	0.0157688	0.00394887	0.0387888	0.00571928						0.0425801	6.98324e-05	0.00019765	0.00981166	0.0561806	0.0276282	0.000113313	0					0.0320914	0.108909	0	0.0410346	0.0875148	0.0397454	0.099612	0.00253799					0.089354	0.102982	0.0245913	0.0226477	0.0372387	0.000456837	0.0113275
16	0.10897	0.00284144	0.0261894	0.0179501	0.0402188	0.0138607	0.0555946						6.95981e-05	0.0327031	0	0.0545864	0.00215569	1.66102e-05	0.0142623	0					0.0304365	0.101611	0.0191712	0.043957	0.0574249	0.00107379	0.0378386	0.000655531					0.00114177	0.116186	0	0.0266515	0.0489251	0.00406854	0.0669627
17	0.0861641	0.0305394	0	0.0281509	0.00443559	0.04139	0.000109216						0.0287927	0	0.0329874	8.1365e-05	0.0666644	0.00971971	0.0148666	0.0234623					0.0155582	0.0430631	0.0644849	0.0484217	3.72728e-05	0.0761927	2.47679e-05	0.0920127					0.0448293	0	0.0292403	0	0.000133899	0	0.0686811
18	0.000415598	0.00719832	0.0855991	0.0242442	0.0819665	0	0.0624497						0	0.0246616	0.00148036	0.0126546	0.0277048	0.00659423	0.00447208	0.000160137					0.00872776	6.00647e-05	0.00291289	0.0461597	0.0318449	0.0385734	0.0596772	0.00257655					0	0.0347542	0.0776793	0.0680314	0.0474448	0.0360203	0.0129457
19	0.0228064	0.0329024	5.30957e-05	0.0320313	0.00861404	0.0437239	0						0.0454546	0.0055275	0.0354883	0.045933	2.94627e-05	0.0223268	0.0150479	0.00691791					0.0128044	0.000393757	0	0.0438437	0.0484236	0.0425648	0.0795297	0.0816329					0.0394799	0	0.00122878	0.00258464	0.0128989	0.00275715	0.0717958
20	0.034659	0.0306973	0.0641618	0	0.0216407	0.00245441	0.0327794						0.00452388	0.00096691	0	0.000397253	0.0726895	0.000238079	0.00855889	0.0493862					0	0.0713201	0.108468	0.0440032	0	0.0292499	0.000312976	0.0301124					4.22878e-05	0.000215662	8.60929e-05	0.0540862	0.00780332	0.0258623	0.088558
21	9.34291e-05	0	0.00793781	0.0317002	0.0354066	0.0445973	0.026048						0.000132236	0.0590675	0	0.000646134	0	0.0286996	0.0517689	0					0	0.00322013	0.0421392	0.0436123	0.0220546	0	0.0401848	0.0477521					0	0.0668061	0.0377478	0.0124342	0.0129138	0.0738141	0.0182873
22	0.0365372	0.0123348	0.0742322	0.0125622	0.0271875	0	0.0354661						0.0853621	3.22303e-05	0	0.0723766	0.000171866	0.000459548	0.000317276	0.0254663					0	0	0	0.0447117	0.0200031	0.0372757	0.0405203	0.0325277					0.00747859	0	0	0	0.0215503	0	0
23	0.000173971	0	0	0.020509	0.00743856	0.0536847	0.0254073						0.00115533	0.0178932	0	0	0	0	0	0					0.05258	0.0106782	0.0672073	0.0486445	0	0	0.000330989	0.018418					0.043364	0.0248632	0	0.0458469	4.46329e-05	0	0.0360161
24	0.0133861	0.0101709	0.0509675	0.00263442	5.51005e-05	0.0405769	0.00266851						0.00186523	0	0.00012101	0.00986431	0	0.000204859	0.0315009	0.00113468					0.00468274	0.0710582	0.0167459	0.0550542	0.0240736	0.0130664	0.0327139	0.0727007					0.00106142	0	9.39195e-05	0.000610312	0	0	0.00350136
1	3.22169e-05	0.000247715	0.00133624	0.00035145	0.00120762	0.00184834	0.00160184						0.00312496	0.0059465	0.00783339	2.87171e-05	0.062353	0.00273791	0.0408832	0					0.0164884	0	0.000921865	0.0532635	0.00651342	0.0146802	0.00389082	0.000105165					0.014437	0.0325551	0.04451	0.000330892	0	0.0568198	0.00496921
2	0.00188469	0.0148945	0.00116368	0.00143194	0.000280094	0.0502251	0.00696798						0.000306232	0	7.26061e-05	0.00410175	8.83882e-05	0.00984705	0.0253972	0.00863824					0	0	0.010364	0.0549594	0	0.000478601	0	0.03434					0.0205582	0	0	0.0187395	0	0	0.00208363
3	0.0375134	0.0122376	0.0366803	0.0645187	0.00360908	0.0292308	0.0234305						0	0.0317469	0.00197247	0.0127839	0.0015026	0.00482525	0.00265907	0.000732054					0.000418996	0.0326552	0.0823329	0.0539872	0.000396023	0.000220893	0.0306357	0.000757191					0	0.0240201	0	0.000242654	0.0341591	0.000161237	0.0357153
4	0.00147231	0.0817704	0.0219329	0.169744	0.0475471	0.0108303	0.00771793						0.0189446	0	0.177223	0.0321105	0.000289717	0.0449277	0.0203736	0.059333					0.0830824	0	0.000137137	0.0547234	0.0299456	0.103476	4.05293e-05	0.0156381					0.0776784	0.0811149	0.000547864	0.0368908	0.00377148	0.0368372	0.0155521
5	0.0315822	0.131959	0.0532727	0.191136	0.112947	0.205064	0.168185						0.0275817	0.192662	0.178542	0.116582	0.0852505	0.14571	0.0462014	0.121306					0.172816	0.0216416	0.0476907	0.0548749	0.124851	0.14439	0.0032536	0.0880445					0.14411	0	0	0.154582	0.00643458	0.000247229	0.111507
6	0.127589	0.161775	0.0927361	0.149703	0.180252	0.190341	0.178859						0.103764	0.294376	0.179406	0.184354	0.121087	0.182698	0.0492004	0.212401					0.18806	0.126036	0.120467	0.0384773	0.120585	0.13121	0.0988555	0.109551					0.156748	0.104073	0.0167646	0.132592	0.144142	0.219835	0.0249248

## Sheet: Fig 3 sex chromosome experiment
seconds of high activity
XX													XX-SRY														XY-													XY-; SRY
day -7
1	1081.63	824.432	1361.07	1142.56	960.532	1156.47	682.732	945.498	1343.2				909.299	1172.76	1050.56	1179.16	1339.76	964.498	1021.93	1347.4	1358.13	891.766					754.399	617.332	1234.67	1389.07	977.531	839.732	649.8	1002.16	753.9	1059.73				558.433	536.933	786.532	760.4	1041.3	729.299	1105.47	1069.93	840.699	1121.33
2	23.9	308.367	741.366	750.966	113.8	27.8667	462.432	667.966	1024.6				27	758	589.632	284.4	756.898	272.7	847.267	642.432	588.067	147.467					140.067	150.567	657.865	889.632	232.433	107.567	21.3333	974.732	184.9	269.767				77.8	170	141.433	280.566	626.701	104.8	335.066	374.9	160.033	890.533
3	53.5667	83.8333	88.3334	243.633	198.133	3.4	2.1	800.567	99.4333				210.867	569.766	64.3	29.3667	12.0667	85.7333	94.6	322.067	189.4	112.033					131.5	21	42.9333	437.099	120.267	12.7667	119.067	226.167	187.467	111.3				154.967	108.3	117.667	244.633	189.7	47.5667	193.433	51.9667	62.5333	116.233
4	146.733	64.6333	203.1	184.967	13.9333	119.433	59.7667	17.7333	159.4				26.1667	328.6	118.233	238.467	168.033	56.9333	113.733	4.36667	0.6	160.933					127.333	53.8333	221.467	10.3333	9.13333	45.8	52.1667	62	203.833	41.1333				192	17.6333	21.1667	70.8333	75.2	52.0667	88.4333	261	80.9333	87.7667
5	56.0333	25.5	33.7333	265.833	79.4333	84.1333	83.6667	81.8	6.63333				36.5333	13.4667	92.9	52.8667	135.233	22.5333	51.4333	21.7	43	32.7333					1.6	68.9	15.9	68.5667	72.2667	167.967	32.7	290	9.86667	132.967				27.9	88.2667	24.2333	85.5667	13.0333	18.0667	143.333	11.7667	19.5	28.6667
6	0.6	41.1	57.4667	81.5	98.3	345.167	63.7	25.1	163.133				60.4	176.867	4.86667	68.6333	24.7	105.867	0	215.433	97.1	69.4					47.1	3.9	50.2667	347.6	60.5667	77.1667	93.9334	27.2667	160.467	152.533				91.5	33.1	25.4667	374.8	54.2333	25.0333	183.1	141.433	28.5	90
7	48.7	25.5	21.7333	255.1	379.2	823	346.567	312.633	336.8				38.6	23.1	49.1	82.0667	95.5333	12.8667	373.4	23.3	449.5	78.7667					66.9	84.4667	48.9333	32.2333	205.033	838.933	625.733	380.634	174.567	37.1333				146.8	11.0667	12.1333	1145.73	139.167	502.267	599.267	637.567	492.8	526.034
8	253.5	461.767	265.2	221.633	512.5	1347.77	278.233	464.6	1096.2				303.334	96.6	396.966	263.667	265.867	740.6	331.667	1317.27	363.1	377.8					195.367	79.9667	792.733	214.8	738.066	847.966	1486.57	211.3	623.133	462.3				70.0667	167.2	501.767	351.2	140.267	182.067	1079.23	500.033	844.932	1025.13
9	768.2	954.8	1334	713.767	328.733	940.733	121.867	392.3	1532.23				260.734	558.933	300.967	815.265	500.6	813.633	132.267	786.466	448.633	640.233					580.9	96.6333	1667.63	514.266	277.767	427.367	1137.73	527.634	1042.93	1237.67				347	62.6667	421.8	259	394.467	294.967	966.999	348.634	849.932	789.232
10	834.532	402.2	1243.9	747.299	144.167	1302.63	100.333	408.333	1478.9				507.633	393.1	307.8	279.967	420.533	229.667	341.333	702.966	530.667	812.533					359.133	156.233	1300.63	432.767	214.933	261.933	451.2	757.633	1148.97	627.066				228.6	237.833	892.432	348.733	339.467	665.399	890.699	382.4	489.767	650.433
11	244.967	195.333	802.633	801.032	458.833	1051.37	85.9667	450.167	994.466				495.133	540.667	425.3	419.067	294.2	87.2333	752.533	566.933	101.533	605.933					316.4	84.2334	1429.96	314.767	151.233	547.867	72.5	812.732	463.433	564.966				208.667	209.733	549.966	204.3	353.566	924.736	474.767	66.2667	100.667	776.132
12	84.4333	46.5	473.333	769.998	78.4667	32.4333	82.0333	512.533	780.066				582.966	207.7	723.066	163.467	244.667	48.7667	177.233	85.9333	30.4	367.667					368.567	241.4	1277.43	22.1667	159.5	294.133	45.6333	313.467	371.567	218.3				119.033	124.667	240.5	9.53333	590.268	522.299	366.933	165.833	193.533	758.798
13	35.3	23.0333	992.433	485.034	18.0333	838.833	510.433	350.567	95.3				40.7667	242.4	486.2	569.533	267.933	252.967	120.7	231.6	629.366	54.4667					634.7	380.6	863.933	515.399	167.833	493	738.633	214.833	848.366	161.333				376.333	19.9333	198.533	185.133	314.799	47.2667	283.133	361.134	786.032	115.867
14	28.7	389.267	841.599	127.633	47.6333	847.4	135.667	195.333	46.5667				93.1333	191.667	232	343.767	992.064	660.066	5.56667	280	432.099	269.567					91.2334	343.466	28.9333	684.499	181.033	7.73333	468.699	38.7	300.267	98.1333				69.4	47.9333	71.5667	11.7333	34.4333	208.767	284.033	17.2667	612.232	123.9
15	435.067	314.7	10.9667	116.5	145.633	72.5333	210	294.067	254.434				201.867	453.867	48.7	28.2	212.2	58.8	390	298.733	77.7	128.933					201.533	256.766	6.1	574.399	98.3667	67.7	254.466	131.8	270.167	153.633				97.7333	238.567	26.9333	206.533	287.033	53.4333	372.033	19.1667	506.799	269.7
16	547.766	319.866	440.5	99.3333	818.433	1009.23	306.833	341.733	1186.7				105.533	478.699	701.199	498.333	256.133	82.3333	20.1667	158	265.8	57					3.53333	33.6333	969.599	296.266	29.3	734.299	149.4	673.5	719.667	511.467				271.433	249.1	82.9001	57.2667	166.8	177.833	141.5	573.266	84.4333	439.767
17	21	95	625.4	88.1333	539.533	194.433	59.1	568.133	639.432				428.967	0.333333	621.566	68.1333	23.6667	111.667	687.532	26.1333	554.966	321.567					131.267	59.7667	592.4	101.733	451.767	126.067	148.4	567.466	275.233	186.633				111.867	230.567	62.8334	446.133	223.9	104.8	639.066	132.867	299.067	229.7
18	49.5333	70.9333	60.3	262.867	19.5667	412.933	110.6	185.8	75.6001				550.766	37.8	123.167	184.033	365.3	694.033	50.4333	341.4	122.4	66.4					15.2667	128.6	31.4333	1.43333	13.5333	155.633	53.6667	95.5	306.7	279.033				9.8	57.6333	390.1	74.0333	22.0333	79.6333	0.566667	518.9	358.8	195.233
19	426.4	68.8667	20.8667	310.6	91.5333	175.4	196.367	206.2	500				5.46667	43.5667	219.2	208.4	359.767	768.999	244.033	69.8	269.533	278.067					359.967	71.3	675.633	57.9334	86.7667	112.833	166.9	89.2667	374.966	101.5				238.9	35.0667	131.067	334.967	154.033	82.5667	71.6	66.1667	479.966	123.3
20	405.633	71.1334	1.5	103.7	36.5	8.93333	57.7	244.167	18.2				142.3	297.5	158.133	10.9667	367.967	303.8	0	461.5	61.4	5.2					173.233	168.433	169.867	162.2	26.5667	6.36667	148.3	12.2667	42.0667	55.4333				48.4333	0.8	76.9334	0	15.9333	28	174.567	115.333	183.133	74.9667
21	553.533	25.8	307.633	29	294.233	203.467	85.9	18.6333	257.9				24.7333	79.0667	278.7	37.2667	188.2	270.867	89.7	23.7333	6.83333	5					6.33333	25.1667	45.7333	12.7333	16.3333	5.5	1.2	82.7333	0.2	17.8333				68.4333	180.367	116.167	200.2	9.8	133.2	108.767	46.7667	23.8	2.1
22	764.965	25.2333	233.567	671.5	20.2667	0	77.1667	89.7667	618.233				151.767	361.8	246.833	8.2	5.06667	112.667	64.5	135.667	144.133	216.533					156.2	23.1667	252.3	85.5	13.8	16.5333	52.7667	312.367	404	402.867				76.2333	11.8667	70.6667	11.2	31.0333	3.6	56.9667	164.767	74.5667	66.8333
23	158.567	388.933	0	235.7	108.8	457.5	66.7667	187.667	30.1				36.6333	28.6333	92.1	348.967	11.4667	0.4	6	118.9	102.733	65.6					100.433	90.6333	151.933	307.2	11.7333	681.7	12.2667	397.267	51.3	6.63333				110.633	28.0333	71.9001	54.7	20.5333	61.6667	139.2	60.6333	157.367	24.2
24	89.8333	21	337.6	109.233	30.1	25.8667	0	343.533	1.4				227.267	169.4	79.7333	19.3667	280.7	53.5	224.5	3.1	6.8	1					6.8	65.3	181.667	2.1	27.5333	250.333	140.433	1.6	56.8333	160.067				20.8667	30.8333	37.9667	30.1	9.8	129.8	86.0667	4.73333	156	34.0333
day 0
1	1066.6	958.699	1050.07	962.399	1242.63	1176.83	1647.4	1150.07	1351.2				628.399	942.731	397.567	701.099	1149.3	993.498	801.799	361.6	1229.27	1155.57	678.066	965.432			1282.6	752.532	1166.96	850.533	1250.43	795.765	748.532	887.232	641.466	1154.46	878.133			1144.27	413.766	335.767	936.5	982.399	1134	1136.13	926.932	842.166	890.299
2	648.099	566.433	359.667	491.433	631.199	754.599	1114.47	868.799	1067.5				200.767	305.133	160.3	92.3001	361.3	97.5333	644.534	315.967	746.169	81.0667	75.0667	38.5667			156.333	144.3	451	726.234	614.733	545.1	181.133	340.8	163.6	516.033	110.067			160.033	113.333	59.7	357.733	529.299	657.932	197.7	35.1	262.9	253.933
3	0.666667	91.7666	48.5333	208.633	9.43333	110.1	496.966	126.533	98.0333				4.9	37.0667	91.9333	107.3	69.0667	82.7667	265.433	42.9	250.999	230.5	250.5	277.3			30.5667	100.333	16.6667	434.767	134.867	156.667	77.6667	21.3	14.6333	0.6	117.8			53.5333	47.1333	92.9333	243.933	141.6	122.133	27.8333	93.2	124.133	69.4667
4	203.4	159.4	21.8333	72.7666	249.7	136.367	24.1667	16.9667	96.6				62.8667	73.9333	40.3	31.8333	32.3667	153.7	71.3	28.3	172.367	9.06667	8.13333	78.9			100.167	33.0667	43.8667	28.1	163.3	89.8667	105.333	36.1	109.8	90.3	4.5			226.734	5.66667	22.4333	21.4667	181.933	42.3333	267.6	228.567	15.9333	30.8
5	4.86667	52.4333	35.0333	130.7	18.7333	201.667	86.2	65.8667	134.133				76.3	154.767	157.033	24.7	42.3	66.9	52.8667	109.5	31.3	263.633	6.63333	3.8			95.8333	50.5	293.767	113.6	59.5667	8.56667	43.3667	2.73333	1.5	256.233	186.933			7.7	29.1333	26.4667	85.9334	96.3333	221.667	0.333333	23.6	274.767	47.9333
6	184.3	20.9	13.2	85.7667	107.3	34.1333	77.8667	89.3	93.4667				50.3667	48.9667	17.1667	17.0333	110.9	104.3	43.4667	31.7333	325.233	19.4667	112.4	125.3			133.567	50.4667	58.4667	26.8	65.1333	65.1333	170.367	131.867	35.2	14.6	592.9			68.4	1.1	19.1	40.9667	46.7667	25.2	268.2	68.4667	8.66667	40.7333
7	14.7	597.067	45.8333	84.8001	839.599	687.6	327.1	256.233	73.7667				32.1	90.1667	70.8333	34.1667	7.16667	83	141.6	109.5	278.5	65.9333	20.5333	157.933			106.933	33.8333	339.567	95.9	564.8	336.267	330.267	30.9	54.5667	27.3667	96.0667			93.8667	43.9	281.267	413.033	128.133	384.633	94.5667	31.1	42.8667	15.6667
8	164.367	23.2333	375	248.3	322.867	1625.67	521.133	372.267	61.7667				116.133	205.733	96.9	166.333	713.596	152.667	191.3	22.6667	983.266	46.1	33.3333	336.1			123.2	16.5	593.9	307.033	434.966	668.9	935.866	56.9	304.3	72.5333	9.66667			122.433	69.6001	83.8667	109.767	190.567	418.7	294.4	201.967	256.433	240.033
9	144.3	1163.37	59.8333	61.5333	326.1	1540.07	1147.97	185.967	111.8				537.3	154.333	208.267	659.666	305.167	633.433	75.8001	174.5	363.633	568.8	532.867	412.867			235.833	55.6667	64.2	398.7	381.834	338.8	697.966	266.367	611.267	101.033	823.766			111.467	154.367	1133.9	294.7	366.133	639.633	359.667	179	283.6	255.9
10	774.599	974.4	876.066	428.433	892.999	1278.5	1268.63	126.133	893.8				570.733	350.434	479.867	887.966	441.499	1221.67	399.766	369.067	145.933	615.5	70.7667	354.1			200.1	79.1333	1556.43	477.467	854.599	444.867	287.967	198.933	467.667	950.999	755.133			556.667	598.633	1318.13	112.033	769.833	338.466	291.9	22.4333	534.7	193.167
11	321.134	1912.27	717.3	1198.17	123.233	1271.8	1105.57	558.033	1466.5				374.167	762.633	845.032	1265.7	540.799	1445.1	281.166	131.167	1288.8	534.767	168.267	386.034			154.9	213.9	2300.33	1094.17	368.9	1003.97	23.4667	424.067	469.6	1313.93	67.5			641.4	270.6	632.566	293.7	684.565	37.8667	333.833	77.1667	287.667	430.267
12	780.966	1824.23	367.734	862.167	73.7	1089.67	785.133	511.233	1754.83				604.933	1088.87	302.967	526.667	512.7	1069.1	20.7	390.534	1141.57	753.933	447.633	103.133			1148.67	255.333	2088.67	714.934	959.299	623.2	698.333	329.6	511.367	1199.93	1563.4			1001.67	114.233	1.23333	1089.4	277.4	971.566	3.66667	211.733	132.533	669.2
13	303.767	1714.53	553.833	171.933	1024.8	254.9	706.1	497.467	1943.1				338.967	1136.67	750.7	462.1	757.732	142.733	437.133	468.2	781.399	256.6	24.7	788.133			745.8	855.632	2222.77	793.733	366.434	28.9667	910.533	33.0667	26.0667	1039.3	2074.5			570.3	64.5667	420.5	782.366	252.667	785.133	192.667	121.233	162.767	399.7
14	12.2333	107.367	8.03333	325.9	1739.23	284.9	5.9	58.7333	1614.33				1048.73	1296.66	760.2	158.267	633.532	917.2	430.733	145	34.8333	11.9	636.533	1104.53			450.467	556.133	2043.07	288.667	714.666	258.133	113.033	1.66667	372.6	406.334	1906.9			511	281.033	4.66667	167.833	1007.03	34.7667	145.3	1.6	237.733	57.6
15	624.833	0	28.5	347.267	1402.67	1827.77	1167.23	139.833	478.867				593.066	1125.4	124.067	191.333	368.433	214.633	46.3333	417.1	1032.53	576.9	305.367	393.133			51.2667	16.9	1204.37	654.067	495.165	444.767	327.1	142.633	29.6333	264.733	418.367			162.8	0	455.9	211.6	91.0667	380	46.3	31.3	183.067	102.667
16	208.533	841.967	334.3	3.76667	938.767	1245.77	345.967	474.933	1594.17				14.8667	1174.03	472.2	99.5333	749.997	537.3	40.1667	228.833	82.9	355.967	44.3333	338.567			537.467	395.367	0	125.133	284	6.23333	410.5	383.033	12.4	522.933	7.33333			306.3	36.9667	0	279.667	235.3	561.133	350.533	594.833	44.2667	255.633
17	18.2	12.3333	0	398.333	0	322.533	403.233	61.8333	822.367				177.267	217.833	198.467	170.5	427.733	232.5	10.7	85	1.3	16.9667	64.5667	9.33333			26.1667	31.6	714.067	422.367	166.4	0	1.3	243.3	0	37.3667	458.433			153.9	274.733	350.733	265.867	19.3333	6.5	225.167	606.633	138.967	17.2
18	0	17.6	0	0	2.5	0	574.933	309.2	215.367				62.4667	226.7	370.467	271	386.533	83.7333	88.3667	414.334	434.8	402.333	83.2667	337.1			12.3667	0	0	0	123.033	0	4.1	0	0	4.73333	0.6			295.433	23.1667	7.03333	1.9	264.133	86.1	0	1.83333	4.2	164.467
19	237.334	8.63333	0.2	342.199	1086.6	124.2	19.4	117.9	17.7333				26.2	5.1	159.4	53.3334	348.1	1.33333	37.7667	73.1	1	75.1333	0	1.5			92.8333	6.76667	153.067	56.2333	329.533	3.6	65.9667	0	0	553.067	37.5667			156.867	10.1667	46.9667	101.867	2	13.4667	330.867	232.733	164.7	129.9
20	426.833	628.834	1.63333	1122.6	808.966	718	0.4	165.833	1369.27				0.833333	96	333.333	315.867	63.3333	618.767	0	67.6667	18.5333	290.667	156.567	234.6			227.867	85.4	331.867	47.1667	22	23.7667	112.4	31.2333	1.8	220.5	286.6			82.5667	80.9667	220.8	119.833	201.967	225.433	23.5333	99.8	0	0
21	28.5667	683.2	554.767	156.167	1.2	0	9.5	140.033	566.667				285.867	510.433	49	20.0333	486.634	33.8333	22.0333	272.367	686.767	111.667	55.7	227.6			242.933	0.7	0	868.7	153.4	295.233	162.933	246.467	2.7	9.9	664.475			5.1	204.2	3.53333	3.8	92.7667	84.4333	246.267	40.2	43.8333	80.8667
22	351.833	0	0	175.933	171.367	0.2	693.133	35.1	6.03333				0	7.26667	79.9667	1.43333	12.7667	322.367	68.8	6.96667	3.23333	538.333	0	6.23333			339.733	284.8	707.6	67.5	103.967	15.9333	377.7	0	463.566	637	1439.8			170.433	216.3	245.267	13.6	0	5.7	38.5333	0	273.733	0.4
23	330.333	825.1	242.167	96.3333	789.467	0	0	20.9333	1081.13				58.1667	372.8	136.633	305.533	2.1	124	3.56667	174.767	242.267	74.5	5.2	205.133			49.3667	4.83333	1603.33	14.9667	2.7	25.8	1.93333	8.56667	42.9333	2	1970.83			53.2667	146.167	3	140.5	185.733	1.2	192.633	85.6667	0.8	64.6
24	118.5	1157.47	443.367	5.53333	0	1142.77	0	113.567	645				20.6333	83.5667	12.3667	5.4	217.567	0.6	10.8	0	0	184.933	94.7	0			473.333	313.833	20.4	430.3	82.0333	372.533	145.733	102.933	38.6333	292.667	1478.23			36.4667	10.4	693.833	0	0	413.9	118.933	101.4	121.333	0
day 7
1	707.366	417.9	280.467	509.767	666.798	671.865	518.232	394.9	433.3				686.866	538.099	627.266	639.733	502.8	1136	446.566	397.1	518.1	422.833	606.599	828.998			560.4	467.3	657.633	652.066	522.7	568.166	1105.3	438.533	256.134	423.866	269.8			577.967	339.265	255.533	684.13	398.198	561.966	824.432	471.5	467.3	396.633
2	658.333	369.566	526.699	761.533	425.432	653.6	262.066	137.4	1312.7				1010.9	651.433	731.233	445.899	730.566	1152.97	249.267	371.333	520	512.1	176	657.832			688.933	236.767	879.033	576.5	444.433	628.066	453.666	622.2	164.8	510.4	381.033			1066.37	330.267	503.966	647.799	486.233	728.533	407.067	51.9	78.9	177.967
3	151.233	230.6	17.9333	750.2	607.966	210.033	569.6	56.4	303.167				167.033	1038.4	306.367	472.1	258.933	321.533	306.667	126.6	374.933	67.9667	108.4	862.432			259.7	66	79.9667	478.6	335.5	471.867	137.867	90.9	53	259.5	30.9333			303.6	27.9667	24.5	156.033	216.567	329.3	64.6333	207.967	41.9333	47.2333
4	13.6	16.6	10.8333	199.7	232.067	17.6	130.367	9.83333	26.8333				210.6	730.033	36.9667	183.2	22.2333	136.933	69.6	18.2	97.0334	5.76667	51.4333	615.365			8.33333	72.6334	57.1333	31.2667	50.2	443.066	10.6	34.1	63.0333	9.83333	20.6			31.3	7.23333	12.4	21.2667	17.6667	16.2667	693.866	59.1333	153.667	21.1333
5	18.1	88.6667	14.3667	25.8667	19.4667	14.1667	6.43333	30.3333	4.8				123.2	58.7333	192.067	7.2	44.4333	38.3333	64.7667	15.9667	26.8333	4.23333	65.6	237			90.5667	11.2	1386.43	9.73333	3.9	29.6	27.4333	8.36667	148.367	17.6	23.3			126.233	15.2	31.1667	97.3667	4.4	179.533	478.933	49.8	78.2	16.5
6	6.93333	9.03333	21.3667	184.167	24.1333	57.4667	19.7333	66.4667	783.834				4.46667	78.9333	443	26.3667	11.2	1621.47	9.96667	12.4667	95.1667	13.9	134.267	24.5333			5.06667	8.83333	1677.17	31.8333	10.1	15	85.6667	36.2	65.1667	38.9333	541.733			297.8	12.1	334.833	326.6	52.7333	357	117.4	139.967	130.833	114.3
7	38.7	913.733	34.7667	0	194.433	1409.87	54.7667	700.366	1190.2				436.8	6.63333	9.86667	121.733	924.533	594.867	284.333	52.5	475.334	692.933	413.1	93.7			70.4	48.0333	0.9	6.2	614.533	384.966	411.567	382.533	449.1	1021.87	374.767			86.2667	27.8333	0.6	972.099	610.5	929.8	1150.27	486.367	983.665	687.233
8	114.033	77.1333	403.133	877.767	558.067	1778.86	521.233	583.067	74.6333				344.233	791.8	312.667	314.633	375.3	992	289.667	519.033	868.166	491.467	455.1	1320.7			679.467	194.033	1074.83	750.5	734.133	786.933	1040.5	752.566	584.4	982.266	664.2			817.3	90.1667	616.466	1241.23	760.233	1667.5	1047.63	271.967	783.799	833.799
9	563.333	1115.23	863.467	178.1	189.6	1655.53	176.833	527.766	690				1697.9	1100.1	1394.2	692.467	1098.03	2154.43	300.033	1101.53	411.434	1746.63	184.567	1858.23			909.434	884.433	2150.27	892.033	117.767	207.667	797.633	787.7	208	792.5	1292.8			854.3	448.767	980.666	779.765	350.433	1388.8	227.033	197.533	4.63333	176.9
10	488.467	1574.37	610.7	618.6	172.267	470.567	260.833	452.232	2380.9				1644.96	1249.43	542.567	336.033	797.8	2054.9	52.9333	113.1	2.8	1636.83	376.2	1251.5			1097.87	722.033	2079.87	362.767	293.9	476.567	608.7	9.03333	62.8	203.3	1107.83			290.633	291.467	878.832	303.933	107.767	303.633	879.166	44.0333	344.5	38.3667
11	213.967	1447.73	290.367	260.933	101.6	397.6	166.9	176.633	612.333				1406.86	64.4667	716.434	1.9	1.6	2010.26	1.4	457.1	253.7	109.133	146.067	281.333			446.1	804.899	1331.73	162.767	4.8	87.9001	422.3	343.767	502.6	745.166	1105.97			395.9	7.43333	13.5	288.733	196.933	2.2	766.333	42.6667	38.2667	245.533
12	1.8	926.2	121.767	30.7	408.366	1569.97	74.4667	156.433	84.4667				252.667	1373.1	6.96667	396.7	695.667	238.967	240.967	0	0.4	0	110.767	542.567			1194.67	293.5	325.5	93.3333	201.5	212.567	433.967	128.833	113.967	0	1.6			546.267	313.5	533.234	333.467	274.2	1150.27	546.7	313.7	335	557.967
13	330.667	0.2	492.033	85.6	71.8667	78.9	109.133	160	1137.03				0.2	951.633	78.2	0	17.4	396.7	27.8	244.033	188.233	1426.03	334.6	170.3			1488.83	7.83333	0	14.3667	106.967	229.9	223.633	0	255.967	557.633	227.1			53.3333	1.36667	591.233	26.6667	111	0	609.734	35.8	253.267	0
14	9.9	0	0.4	393.3	338.8	515.967	7.23333	228.1	0				1262.3	26.9333	782.6	262.267	576.133	2125.07	24.4667	0	137.3	68.6	74.7333	209.367			456.567	452.2	1141.07	486.067	10.7333	0	0	0	1.6	0	1893.17			425.167	138.5	145.633	174.3	483.532	266.233	1.43333	113.567	220.533	335.9
15	8.43333	828.6	709.567	11.6	0	108.233	69.4667	125.433	0				332.633	631.567	17.5333	16.9333	144.533	1092.77	360.3	205.333	224.2	69.1	282.4	605.4			8.7	239.867	2508.7	0	4.56667	472.767	1034.33	0	359.967	0	154.567			436.067	0	213.2	292.3	527.299	215.533	965.399	282.333	0	338.767
16	0	254.233	0	0	16.4333	0	102.333	77.0333	0				1.1	12.5	311.167	8.73333	349.767	511.267	1.13333	245.7	0.166667	979.832	70.4667	264.367			1043.53	4.73333	1077.3	355.3	304.333	178.333	353.967	0	0	167.9	0			400.2	248.667	8.23333	2.46667	211.3	199.7	119.967	15.6667	311.8	272.967
17	0.2	0	0	44.7667	63.5333	8.3	0	106.867	870.534				496.7	0.5	0	391.233	0	871.667	57.4	0	21.4333	15.8	25.7	110.367			20.2333	182.833	0	159.567	152.1	0.8	0	47.9333	0	280.233	0			958.199	0	713.233	202.933	3.5	184.067	692.567	24.6	1.93333	73.8
18	375.466	1.2	6.53333	951.6	19.9333	4.66667	0.2	1.6	688.934				174.867	0.2	239.6	0	12.6667	16.7333	78	277.633	1.2	397.867	244.867	113.8			177.367	196.767	0	0	0	3.2	13.7	314.667	2.1	43.2667	3.83333			28.0667	148.067	2.7	52.8333	26.0667	0	83.8999	207.867	438.1	128.8
19	10.2667	756.733	425.1	40.6	827.738	12	170.433	2627.2	104.667				1.26667	732.533	3.66667	3.53333	229.9	0.5	22.2333	0	174.933	16.3667	0	101.533			843.067	0	1031.87	0	9.93333	0	0	33.7	0.8	0	564.1			201.067	0	26.6	196.667	563.598	88.5668	60.8334	2.8	527.666	183.5
20	494.865	22.3667	2.2	49.5667	302.833	1512.57	93.6667	3599.8	0				202.833	703.93	11.7	15	0.2	966.867	27.7333	29.6	0	89.6334	15.5	116.433			35.6	28.8	1532.2	409.133	4.7	460.333	0	2.2	44.8333	5.63333	514.33			453.567	3.2	160.1	153.1	124.633	104.6	505.4	168.533	161.5	77.1333
21	0	82.7	6.6	17.0333	4.6	46.9333	7.26667	3599.8	1098.23				4.36667	356.633	14.5	31.1667	180.633	822.9	21.9	254.6	125.667	612.9	158.133	482.434			6.2	24.1	0	327.4	60.8	0.4	362.333	79.5	244.667	794.767	1078.43			0	111.5	795.133	87.9667	159.333	82.2333	182.667	18.4333	0.766667	139.933
22	323.1	350.633	820.467	78.8333	45.5333	193.8	165.767	2235.3	724.167				336.133	2038.23	797.433	342.6	4.53333	6.2	1.8	0.4	1.76667	199.967	7.63333	73.5667			291.1	90.6	8.06667	7.56667	242.267	2.53333	60.0667	11.2	86.8333	1848.2	2015.57			1053	58.5	1588.83	851.167	299.367	1566.27	13.7667	291.4	228.4	71.2333
23	829.666	14.1667	0	1343.53	92.2	1487.43	0	14.6	424.167				68.7333	1922.3	1	348.033	829.267	1840.1	391.333	154.367	1136.53	1741.47	0.9	17.7			820.267	1047.03	2928.46	474.3	195.933	444.967	221.433	390.467	0	2021.33	2300.86			1507.8	949.366	1230.17	1565.83	562.9	525.433	538.9	50.3	16.9667	230.233
24	8.5	2023.47	804.9	183.667	270.7	1	767.733	46.4	2671.2				623.567	1569.93	1078.23	819.034	1378.1	2055.37	638.234	182.967	1528.1	1016.73	214.767	1087.9			1325.5	161.333	2520.76	67.0333	882.533	1.16667	295.033	382.333	88.8	1651.3	2123.07			937.333	1073.03	1384.43	1434	1210.57	895.034	58.3333	80.3667	0	63.6667
day 14
1	257.134	169.333	204.9	551.134	773.533	436.499	474.098	472.233	345.2				312.633	492.032	410.2	401.5	335.367	402.233	321.798	438.199		153	586.999	471.065			412.533	344.8	328.933	612.466	352.333	369.933	738.965	496.6	773.733	238.667	270.733			371.966	451.332	221.6	350.998	92.1334	384.133	728.232	636.633	551.866	494.933
2	377.2	422.633	392.633	1032	405.733	519.299	296.233	621.466	1254.06				244.3	296.9	735.099	512.9	809.1	1057.33	260.3	553.899		364.167	195.467	750.43			698.198	282.3	680.266	634.833	337.333	272.866	283.467	560.8	153.567	604.1	1146.33			802.933	344.9	598.566	357.933	102.7	367.5	768.167	269.1	538	447
3	164.4	1196.3	105.233	997.733	617.466	507.2	132.933	499.866	1255.8				37.3667	887.8	262.067	458.9	810.9	1347.2	301.6	38.0333		18.3	96.9667	849.331			192.367	19.0667	482.633	469.8	275.867	282.867	88.3667	462.6	89.8667	118.467	526.033			77.8	33.1	274.433	118.167	46.4667	556.533	572.733	103.6	258.967	231.733
4	15.7	746.566	13.2	234.5	310.267	10.6333	20.3333	44.5333	98.8				32.7667	836.9	11.0667	22.3333	7.06667	1419.9	0	31.6		10.6667	241.033	684.197			166.833	17.3667	9.53333	17.1333	43.3333	4.16667	58.9333	438.333	108.867	22.1	68.7667			5.5	5.23333	3.8	10.8333	0	67.4333	25.7667	22.1667	65.2	78.9667
5	16.8333	20.6	9.1	20.3333	39.6667	4.2	11.0667	29.1333	143.5				3.5	8.56667	2.36667	25.5	25.1333	499.133	12.6667	51.6667		50.7667	174.533	289.534			177.767	9.1	115.5	10.4333	4.6	40.2667	205.3	13.3333	71.8667	5.23333	7.96667			134.2	4.93333	44.5	40.9	5.33333	15.5667	110.667	36.5333	18.5333	36.3333
6	2.96667	3.63333	513.867	6.8	28.9333	94.9333	33.7	17.5333	21.9333				301.067	11.2667	63.2	282.6	8.43333	0.233333	35.7333	481.033		411.933	110.3	39.6667			167	47.1	19.5	24.9667	0.2	83.0667	324.867	82.7	45.1	156.7	4.9			70.7667	12.7	0	122	28.8	257.433	98.4667	25.7333	13.9333	101.167
7	16.9333	39.8	32.3667	18.9333	222.667	1453.9	143.9	30.3	493.4				200.367	12.1667	98.9	18.5333	170.633	186.033	339.6	112.433		504.567	254.733	170.1			633.033	41.8	527.867	5.16667	184.3	1139.87	1055.43	352.967	625.767	46.3	43.8333			118.667	153.367	120.9	110.4	82.7667	1162.87	1239.77	506.433	416.367	406.933
8	77.9	5.06667	3.76667	452.667	776.3	1421.3	320.234	414.467	924.099				20.5667	532.8	360.233	277.367	475.534	1333.23	45.0667	115.033		304.7	232.9	12.1			491.5	332.033	1289.87	916.2	148.5	830.466	1098.17	598.567	628.4	605.367	1213.97			382	63.9333	373.967	120.067	136.9	528.2	1104.43	399.667	516.233	120.567
9	320.6	656.866	47.4333	289.433	702.533	724	541.567	522.6	669.1				495.867	1231.5	558.333	962.632	1230.53	2154.17	144.633	255.633		20.4	5.8	195.3			560.833	532.767	1661.67	1260.7	28.5667	143.833	911.399	22.8667	224.5	499.399	1203.1			381.033	18.9667	564.666	51.6333	112.367	33.5667	352.8	147.467	57.2	335.5
10	126.6	45	544.267	204.2	53.7	480.667	47.9	459.033	520.566				582.267	412.4	145.633	276.067	481.733	1709.57	0	461.8		249.5	24.5667	544.267			847.567	618	730.633	481.333	5	10	434.934	204.933	76.5333	523.9	1229.6			750.632	50.2333	6	256.5	5.2	446.833	642.4	57.7667	70.3333	0
11	15.2667	410.967	282.967	0	282	1236.9	191.267	37.0667	830.099				1.36667	421.033	10.6333	0	110.133	1158.87	115.133	2.16667		16.6333	180.067	73.1333			496.667	69.1333	22.6	0	291.067	324.2	0.7	4	430.067	1.03333	220.233			140.333	109.867	0.966667	20.6	85.9667	559.4	551.7	252.5	133.267	342.867
12	452.533	0	357.6	228.267	16.9333	62.8333	91.3667	356.167	1196.57				271.9	57.9	217.334	584.167	345.833	1.2	1.8	471.067		570.1	0	23.3667			512.633	145.4	632.8	512.967	21.4	0	1273.8	16.7667	3.03333	0	542.7			258.8	49.9333	208.833	49.4	13.0667	135.367	365.734	20.7333	0	772.301
13	105.233	0	0	132	0.4	795.4	75.1	530.567	734.863				1.36667	592.033	5.2	0.633333	104.933	1725.73	153.4	0.5		236.733	125.5	207.767			920.433	86.1333	0	169.767	4.73333	508.3	728.233	502.033	362.867	531.6	108.2			0	0	137.467	110.067	6.7	175.633	243.167	387.2	173.333	735.067
14	0	550.233	318.367	0	83.5333	1740.6	190.4	0	592.63				229.6	0	618.4	483.267	788.167	547.7	99.6	293.667		4.23333	0.933333	147.3			864.232	10.6	3.13333	2.6	23.7	293.233	60.5333	6.83333	7.4	616.767	592.867			517.4	142.667	95.6667	93.0667	111.433	0.6	355.034	15.3667	0	239.933
15	0	35.2333	0	0	751.333	149.233	0	235.967	949.667				410.867	393.4	18.2667	6.9	0	0.433333	0	673		165.533	49.8333	14.5333			602.4	686.133	0	413.433	244.067	0	561.367	20.4333	4.16667	317.233	49.3667			83.1	0	0	43.4333	0	0.4	69.2333	295.067	94.0667	246.267
16	0	0	0.5	0	167.733	0	0	240.533	763				0	0	12.0667	8.33333	136.7	1155.9	183.833	30.0667		269.467	136.233	41.8667			459.7	70.6666	0	0	36.8	0	213.933	269	342.2	340.967	0.333333			62.7333	10.6	6.56667	12.0667	7.2	20.8	445.667	0.4	198.767	96.5333
17	0	228.7	385.7	425.467	0	0	10.9	0	536.033				64.5667	0	92.7667	127.8	191.4	84.9	0	133.6		0	0.4	0			215.733	4.83333	891.667	208.867	0	0	0	1.3	0	2.83333	5.06667			13.4	22.7333	298.4	142.333	0	1116.17	170.033	264.033	33.2	77.0667
18	0	190.633	87.8333	45.9667	32.8333	0	203.367	2.43333	217.6				0	0.2	104.767	106.967	81.2334	187.267	61.3334	362.367		48.6	0.8	0			0.5	0	235.133	216.9	19.2	110.967	54.5334	1.86667	203.2	0.633333	0			71.2667	6.93333	1.83333	19.9667	7.93333	17.7667	107.133	30.4333	18.9333	0
19	136.633	0	31.7	14.9667	252.5	560.433	24	101.233	31.6667				0	437.567	0	70.2334	14.8333	10.4	475.797	3		0	0	132.5			0.8	0	98.6335	0	19.2667	510.467	1152.42	16.0333	0.6	343.867	6			134.833	0	179.167	0	12.4333	289.566	6.5	142.833	0	61.1333
20	198.5	0	0.2	0	115.367	769.134	33.6333	4.9	8.86667				0.1	0	209.967	95.5333	1008.58	10	198.3	698.467		0.6	313.967	123.133			306.034	13.3333	4.43333	0	1.2	0	79.8668	12	72.6333	893.167	296.267			353.267	3.33333	52.3667	166.4	47.4333	159.467	226.433	0	89.7	4.23333
21	18.4333	460.3	22.2	34.0333	1.03333	140.767	6.2	126.767	853.967				417	4.53333	117.167	36.2	10.2	1029.53	183.867	320.4		68.9333	0	102.467			339.067	283.033	144.6	172.067	28.8333	59.2667	629.2	238.067	0	8.26667	115.167			689.533	0	238.467	210.533	213.1	88.8333	0	0.2	0	10.4667
22	33.0667	552.867	10.1	273.3	76.3667	397.733	203.267	3.6	508.5				532.6	1218.6	888.667	271.6	779.567	2453.13	89.4667	261.233		149.4	106.167	149.733			364.7	11.3	2752.36	0	5.6	211.767	2.33333	0.1	143.2	1174.27	1143.1			511.6	186.5	134.167	351.3	229.067	442.167	784.067	74.9	298.967	127.1
23	89.3	672	1174.27	220.167	1479.8	2284.83	806.433	275.433	2733.83				939.266	1676.1	1270.03	559.967	1319.53	2543.06	695.434	462.4		970.867	3.9	58.2			2006.3	537.633	2992.16	6.4	531.033	914.334	168.9	59.1333	55	2144.33	2005.37			1051.67	376.1	1294.37	1238.53	490.567	864.734	43.6667	6.43333	47.1	655.134
24	343.7	1565.77	1605.37	989.334	1164.83	1736.07	489.267	422.8	2309.3				1045.87	1956.17	1573.37	1209.47	1558.9	2001.7	448.834	988		1436.03	55.2	501.433			1516.23	907.834	2223.2	766.066	564.067	1038.13	1075.33	15.2333	0	1489.33	1786			836.9	1011.97	1392.8	1235.27	788.633	1508.87	1474.4	425.934	140.167	818
day 21
1	439.8	317.467	459.733	323.4	561.232		305.233	636.9	209.267				341.465	234.733	303.8	279.599	308.6	407.566	348.7	373.166		197.233	628.233	492.165			438.032	334.133	249.633	444.433		683.333	502.965	753.066	747.667	273.9	297.933			707.264	248.832	226.433			284.4	680.066	413.233	756.532	372.266
2	774.699	498.233	721.733	672.633	313.433		288.033	739.1	1065.83				362.433	912.166	629.266	629.899	557.9	492.566	227.2	626.833		675.733	204.6	797.364			644.132	680.5	716.799	285.966		510.033	303.733	636.8	907.9	323.833	1023.4			513.9	300.067	569.799			829.699	989.733	252.867	652.133	453.833
3	1034.16	1035.73	1205.2	685.6	324.867		292.433	176.033	766.9				183.7	1063.3	235.8	656.566	668.733	543.633	331.133	92.8333		182.9	84.5333	469.066			262.834	523.133	988.7	556.933		756.333	140.6	443.133	198.367	21.9667	503.7			226.367	239.333	576.266			438.5	1359.07	54.1333	325.533	188.2
4	410.234	1415.57	1218.6	390.833	15.2667		7.33333	264.8	110.233				26.3667	828.333	17.2333	247.3	216.9	141.967	29.3667	54.7333		20.1	212.333	324.633			118.233	24.8	83.4	219.133		26.2333	29.2333	141.533	30.7667	65.9	23.9			124	131.433	1.2			28.2333	467.367	99.8	35.5	66.6667
5	20.8667	585.633	15.3667	31.2333	117.567		16.5333	20	155.267				3.1	86.6334	21.1	22.0667	0	46.7	14.6667	82.6334		8.1	193.3	59.1			98.4	18.2667	16.3	12.2		37.6	95.8667	26.4333	98.1667	6.5	7.13333			121.967	7.3	14.5667			23.5667	2.4	31.0333	33.3333	76.8667
6	33.5333	0.133333	67.3333	7.43333	35.6333		10.9333	22.9333	450.566				180.867	39.2	85.6	4.4	10.7	474.467	74.2333	73.9333		98.2333	69.1667	8.16667			284.7	40.5333	65.8333	0		124.767	49.4667	10.4	221.9	26.7667	8.2			5.4	0.3	134.7			228.833	32.8333	61	470.767	88.9
7	22.4	228.5	21.7333	164	762.233		169.967	316.267	324.333				9.13333	270.9	12.0333	229.5	212.867	171.167	179.9	60.9667		18.0667	406.433	22.6333			160.067	15.7	520.2	217.667		701.567	706.5	573.999	491.067	82.4667	421.467			122	24.3	40.7667			746.6	1362.3	377.667	270.333	450.967
8	60	770.333	129.767	73.7333	274.567		870.233	678.5	284.734				165.733	951.366	399.967	301.633	714.8	313.567	143.167	429.633		263.1	446.034	290.267			594.666	321.733	1476.73	665.4		441.567	905.366	934.499	720.333	803.9	724.767			285.967	218.933	328.467			404.933	1302.23	78.2	657.267	586.8
9	315.6	687.4	1025.37	315.033	385.6		170.767	552.467	291.334				461.967	165.933	138.633	292.1	896.933	1023.13	10	389.6		266.1	96.1667	661.334			338.567	856.732	1494.23	67.9333		9.6	619.466	422.967	431.6	650.767	722.7			878.734	284.633	434.867			549.7	1006.47	18.0667	9.93333	190.5
10	440.167	1.9	180.567	121.433	0.766667		9.56667	135.933	307.1				282.3	389.999	300.734	56.9333	2.53333	285.533	241.167	60.8667		21.4	323.833	109.9			216.2	410.9	26.1667	191.733		168.567	19.4	3.86667	16.9333	4.7	365.067			178.3	208.433	449.167			464.367	81.4334	216.933	4.76667	210.633
11	147.6	0	129.4	20.0333	9		320.8	355.3	356.8				0	480.033	41.5	174.833	357.134	7.86667	0	217.767		490	148.4	2.13333			343.034	189.067	156.7	2.03333		0.1	850.666	96.1	278.2	21.4	4.3			271.967	119.967	4.83333			385.967	1129.33	0	230.3	124.167
12	60.7	694.033	246.9	306.233	183.933		0	195.7	151.867				23.4	711.533	121.8	51.5333	43.7333	885.033	226.133	343.267		2.53333	20.9667	95.7333			419.967	128	543.267	7.3		721.599	556.131	695.8	392.967	377.3	577.967			44.3666	78.2	37.7			358.333	447.467	143.267	27.1333	466.767
13	392.634	0	0	23.1	57.7333		89.5667	270.5	0.4				346.8	116.167	14	332.733	32.2667	215.167	0.2	446.4		118.5	275.533	0.366667			7.66667	103.467	843.367	179.767		0.833333	359.133	0.666667	484.067	2.9	13.9667			794.233	45.1667	226.3			94.5001	306.767	334.567	70.7667	86.6333
14	15.0667	262.167	0	0	666.333		5.6	407.967	0				0.233333	120.767	379.934	0.8	605.2	0	104.533	5.06667		280.1	203.133	467.634			507.933	331.167	1846.5	576.366		50.0667	352.133	0	1.73333	0	0			566.9	90.7667	3.56667			417.6	421.767	183.633	184.6	221.233
15	0	56.6667	0	0	644.197		12.9667	0.9	21.5				511.6	3.9	111.533	1.2	0	388.933	228	648.367		162.333	172.8	50.8333			973.767	269.867	146.033	43.4333		190.3	5.7	325.7	0	0	0			527.033	0	8.86667			55.8667	81.8333	379.934	1	310.433
16	0	0	381.234	0	0		209.333	135.633	900.666				115.667	757.132	0	286.967	25.6	0	62.5334	116.867		0	68.4666	0.6			281.167	6.63333	0	0		0	738.266	120.267	426.534	0	0.266667			75.1667	0	525.699			0	461.6	1.3	169.3	498.533
17	143.367	155.333	281.2	0	0		3.1	522.167	102.1				0	51.4	145.233	0	183.033	345.567	21.6667	3.13333		0	271.134	0			0.166667	0	0	0		0	150.066	0.633333	9.03333	646.567	0			36.8	178.233	6.4			7.66667	371.5	0.1	2	54.5333
18	168.567	191.533	13.4	0	131.767		0	50.7	0.6				69.1334	26.2333	10.0667	0	0	0	0.6	214.233		0	29.4667	0			266.767	0	0	193.333		153.833	120.133	2.83333	394.367	105.7	0			60.7	0	188.867			13.7	191.267	251.133	16.1	107.4
19	11.8	17.6667	72.6667	323.1	162.7		35.4667	14.1333	0.6				0	56.2667	4.56667	31.8667	10.5333	77.6	43.4333	274.733		41	0	0			418.967	0	0	5.2		559.298	74.8001	0	0	303.165	49.0333			189.9	14.2	79.2667			462.967	306.6	87.4333	0.4	18.8333
20	67.9334	25.2333	1.8	19.8333	0		80.3333	180.1	286.767				111.433	107.3	230.267	6.7	27.5333	228.267	14.8	9.46667		628.867	113.133	89.7			23.4	195.767	0	3.2		712.898	162.4	142.433	14.1	22.8667	548.3			745.165	1.4	18.7667			0	117.067	0	0	76.4667
21	44.2667	462.767	14.9667	33.6333	10.2		0	0	49.2667				149.5	661.434	207.667	107.967	1406.73	123.867	52.5667	366.367		251.267	0.4	6.36667			341.733	150.9	621.033	16		81.2667	687.166	0	261.967	417.933	12.1667			74.4	0	154.667			207.533	935.267	0.9	280.733	138.8
22	663.667	269.833	502.3	572.267	336.333		9.06667	31.5333	559.433				754.367	1827.83	421.233	105.567	1624.73	677.167	200.933	226.433		579.267	131.033	43.6667			642.633	132.1	1076.87	60.6		784.833	0.5	176.1	126.5	0	325.433			522.3	122.6	798.466			753.2	604.233	118.933	15.2667	111.4
23	1242.33	2031.53	1150.93	523.4	718.533		631.7	533.733	2345.43				1008.67	2018.7	1411.93	1256.43	2092.66	1674.5	222.3	911.066		1585.63	102.933	811.7			96.8667	545.567	1975.67	1159.67		992.634	909.567	29.7333	6.96667	1713.3	1883.87			736.234	913.833	939.566			432.733	780.067	118.767	663.867	326.267
24	934.633	1490.13	1432.27	941.8	254.9		501.533	851.3	2486.2				1287.2	1596.63	1438.1	1001.4	1460.27	2040.2	755.634	1168.23		1519.8	266	765.333			1486.07	528.067	2407.23	1094.87		1235	1202.2	1211.7	517.3	1912.83	1622			610.367	1473.4	1430.13			1558.63	1900.37	559.534	505.133	635.967
day 28
1	454.2	217.167	247.833	562.533	291.799	363.733	401.599	873.4	168				284.167	454.366	223.333		241.6	347.899		309.433	304.867	195.6	633.166	659.631			171.633	313.9	216.4		386.9	394.099	551.466	812.566		622.733	354.433			418.665	248.832	100.033	279.967	492.299	261.566	736.732	677.466		351.667
2	461.399	560.133	279.367	584.933	273.3	655.766	298.567	771.566	1003.77				524.266	226.7	622.533		400.233	555.1		719.466	772.8	559	340.333	459.532			322.166	460.8	655.699		538.033	447.166	599.966	747.566		237.567	433.633			402.866	300.067	725.166	347.7	304.1	514.066	550.933	466.133		333.2
3	754.433	779.133	695.633	724.266	527.3	1039.07	30.8	432.2	677.033				343.667	626	990.033		302.6	458.4		325.567	987.833	257.5	107.1	551.167			55.8667	271.733	844.433		788.633	509.533	192.4	377.133		47.4333	933.899			221.767	239.333	267.9	350	222.633	379.233	1158.37	52.1334		89.3334
4	154.533	30.8333	154.533	207.467	8.23333	256.067	2	295.167	76.5				50.5333	689.867	422.033		1.4	39.2667		83.2667	466.2	2.36667	162.5	94.3667			4.6	41.0333	40.9		173.433	54.9667	29.3667	532.167		75.4	127.633			31.6667	131.433	24.0333	18.6	10.2333	17.8333	873.9	12		6.4
5	45.4667	12.5333	6.73333	9.3	10	10.3333	45.5667	24.7667	4.33333				13.8667	6.13333	31.7333		9.23333	75.6333		45.9667	1	27.4667	69.6	103.833			10	36.0333	29.5		179.2	22.2333	106.2	409.9		192.867	9.76667			18.4333	7.3	2.2	4.7	11.8	3.6	16.9667	18.7		21.2333
6	21.0667	4.2	0	109.367	24.2333	16.6	89.2667	89.4667	10.9333				40.4	1.6	13		9.1	29.4667		63.4333	96.5	21.1333	58.7667	17.9			9.7	11.4	103.133		65.4666	19.8667	175.533	17.0333		30.9667	53.2			5.13333	0.3	10.8333	19.3333	17.8	94.4334	66.4667	13.7667		74.9334
7	39.3333	62.1	9.9	6.96667	140.733	496.867	312.6	7.6	20.3333				294.567	13.4667	28.3333		77.2333	51.6333		237.133	198.067	67.9	735.166	117.6			36.8667	93.2667	161.6		262.867	601.367	1190.53	30.9		482.067	334.567			12.5667	24.3	153.4	86.9333	76.5333	375.4	874.599	347.133		463.1
8	156.6	499.5	289.5	80.2	193.033	148.933	345.067	0	125.833				214.767	157.767	226.067		462.633	393.7		616.634	281.867	214.9	492.867	252.933			479.867	223.167	805.733		384.8	694.833	1233.1	748.5		556.133	549.833			233.933	218.933	160.1	397.433	279.267	609.866	739.733	50.5		70.4
9	492	2.7	433.567	283.233	26.8667	546.167	121.833	0	343.5				448.334	301.167	564.067		686.1	931.134		563.034	18.9667	193.733	79.5667	378.5			577.866	309.667	3.8		503.766	14.9333	877.931	581.6		141.1	1353.83			772.733	284.633	243.933	11.9333	1.26667	219.833	52.6	317.3		4
10	609.399	136.233	154.467	31.7333	16.0333	2.13333	171.567	0	109.567				32.8667	50.7333	79.7667		99.5667	190.8		669.233	114.333	267.3	13.2333	23.3333			181.5	332.367	149.4		182.933	137.233	573.7	8		20.7667	357			113.733	208.433	20.9333	5.36667	139.867	154.933	429.734	0.2		67.9
11	27.3333	367.267	61.7333	7	234.367	391.833	61.9667	0	0				294.133	132.567	9.76667		44.4	57.6333		292.533	6.7	37.3333	164.133	368.367			51.6667	0	5.96667		293.2	6	987.564	0.5		392.867	197.3			2	119.967	223.967	91.2333	13.8	38.2	4.33333	8.6		158.4
12	167.033	0	0	43.2667	156.433	31.7	5.4	0	7.83333				0	138.133	325.4		187.467	198.1		560.367	204.367	219	4.73333	144.9			256.133	197.7	32.1		15.1	469.433	249.6	318.9		114.833	63.3333			169.8	78.2	13.6667	0	125	447.367	522.833	5.56667		0
13	66.1667	295.867	337.567	272.4	0	0.2	438.633	0	453.767				365.567	219.267	151.733		191.033	8.93333		24.2667	26.9333	98.9334	7.4	43.8667			93.5001	112.033	331.567		213.5	0	1340.63	446.233		178.567	635.733			1.2	45.1667	151.6	40.9333	0	0	55.1667	105.3		241.734
14	894.066	0	0	0	14.7667	673.133	5.3	118.567	0				7.23333	0	4.63333		153.767	145.533		732.833	120.967	87.1	273.6	353.633			645.266	260.067	0		34.4667	23.9333	493.733	1.2		222.067	438.299			103.533	90.7667	0	263.6	106.533	0	39.9	0		0
15	23.6333	0	0	0.766667	0	23	0	428.9	0				1.8	165.167	201.233		0	0		19.8333	173.5	241.533	58.7	19.5			0	0	0		728.199	745.933	0	41.2667		5.9	165.4			0.233333	0	283.8	0	0	551.2	624.233	271.5		278.9
16	25.1667	0	0	0	0	10.1333	0	326.4	438.867				350.434	0	422.3		42.2	291.367		1090.97	0	247.933	0	128.8			0	0	0		95.3667	0	605.6	615.933		404.133	242.833			116.667	0	0.433333	0	89.2333	124.667	248.299	181.766		0.2
17	0	530.267	0	0	486.133	0	0	520.667	340.367				0	0	0		2.33333	479.567		453.5	14.0667	0.2	158.6	397.633			0	0	0		65.6333	0	311.567	0		0	1.2			0	178.233	0	0	1.13333	0.2	28.1	158.6		0
18	0	80.6667	409.5	0	81.2667	227.9	433.9	74.1	379.766				0	0	36.3333		7.33333	41.5333		178.333	281.933	0	0.966667	848.266			508.533	10.4333	0		62.5333	0.2	24.1	0		0	0			0.2	0	0	24.2667	0.833333	182.099	205.1	16.9667		73.9667
19	172.9	2	0	226.3	13	513.667	214.4	119.033	107.1				187.5	7.3	9.2		27.9667	29.6		63.6333	246.5	252.1	0	349.7			7.56667	504.333	1.1		729.629	167.367	488.6	58.8333		300.233	63.4333			47.1333	14.2	160.367	6.23333	50.0333	77.1334	375.067	474.332		2.43333
20	44.6333	61.0333	2.4	19.8	27.1667	3.66667	5.5	446.5	11.9667				229.5	17.2333	248.133		4.23333	82.0333		154.5	0.6	83.2	32	2.76667			13.6	31.7667	64		1143.83	0	691.367	0		9.6	368.234			377.767	1.4	655.663	43.6	3.5	121.067	69.9667	0.633333		68.5
21	58.9666	468.8	6.2	25.5667	0	98.4333	18.5667	285.1	88.8667				602.867	47.1	30.7667		104	7.23333		290.3	250.067	136.467	22.1	151.5			152.367	3.16667	730.967		67.3667	21.7667	0	51.0333		0	12.9			154.133	0	145.067	250.667	0	449.1	84.5333	19.8667		60.3333
22	387.8	975.433	13.6333	5.3	80.9667	248.3	264.633	29.5	765.867				987.566	353.9	331.733		918.334	422.1		536.267	91.4	1249.9	0.6	233.967			157.433	48.7	752.067		97.6333	298.867	0	141.6		136.1	540.833			321	122.6	849.933	250.133	0	74.4	1279.87	69.7		4.2
23	1054.77	178.8	1134.03	1325.07	289.667	2076.1	165.233	774.534	1962.37				1131.7	945.3	999.534		1575.5	993.433		1293.07	1647.27	1000.2	39.2333	195.7			561.967	735.733	2600.2		500.567	672.367	1080.2	833.3		244.367	1380.5			652.6	913.833	2006	1592.2	262.267	1491.2	1507.3	464.367		660.133
24	1174.63	1523.7	1298.2	1543.07	223.067	1853.03	600.734	1109.5	1763.4				1123.03	1753.9	1578.4		1906.6	1357.9		1523.87	1349.6	1109.43	262.533	572.367			1292.73	979.233	2122.47		756.867	1019.87	1627.77	903.367		0.233333	1734.2			907.566	1473.4	1851.9	1310.67	676.8	1388.6	1115.17	567.5		568.7
normalized data
day -7
	XX	XX	XX	XX	XX	XX	XX	XX	XX	XX	XX	XX	XX SRY	XX SRY	XX SRY	XX SRY	XX SRY	XX SRY	XX SRY	XX SRY	XX SRY	XX SRY	XX SRY	XX SRY	XY-	XY-	XY-	XY-	XY-	XY-	XY-	XY-	XY-	XY-	XY-	XY-	XY-SRY	XY-SRY	XY-SRY	XY-SRY	XY-SRY	XY-SRY	XY-SRY	XY-SRY	XY-SRY	XY-SRY	XY-SRY	XY-SRY
6	0.152062	0.157103	0.129647	0.129579	0.173497	0.100729	0.163102	0.116659	0.10544				0.166299	0.162336	0.141753	0.19014	0.17655	0.141606	0.166424	0.164621	0.197578	0.154643	0.140523	0.20281	0.151798	0.18677	0.0971416	0.185836	0.225067	0.117826	0.0912192	0.12217	0.0840019	0.150329			0.150002	0.185271	0.155053	0.132306	0.198437	0.140815	0.125847	0.175608	0.106606	0.130998	0.2548
7	0.00336	0.0587619	0.0706182	0.0851674	0.0205553	0.00242721	0.110473	0.0824158	0.0804304				0.00493794	0.104924	0.0795593	0.0458594	0.099742	0.0400374	0.13798	0.0784906	0.0855507	0.0255725	0.00288699	0.0197321	0.0281838	0.0455531	0.0517598	0.119019	0.0535154	0.0150931	0.00299478	0.118826	0.0206021	0.0382679			0.0208981	0.0586592	0.0278815	0.048817	0.119428	0.0202351	0.0381441	0.0615323	0.0202933	0.104036	0.0551125
8	0.00753071	0.0159752	0.00841412	0.0276306	0.0357881	0.000296143	0.00050168	0.0987765	0.00780547				0.0385648	0.078868	0.00867602	0.00473537	0.00159011	0.0125872	0.0154058	0.0393493	0.0275535	0.019428	0.0401034	0.0366523	0.02646	0.00635344	0.00337793	0.0584772	0.0276902	0.00179134	0.0167146	0.0275711	0.0208881	0.0157885			0.041626	0.0373693	0.0231962	0.0425649	0.0361505	0.00918429	0.0220205	0.00852929	0.00792964	0.0135788	0.00701668
9	0.0206286	0.0123164	0.0193461	0.0209772	0.00251672	0.0104028	0.014278	0.00218799	0.0125128				0.00478553	0.0454854	0.0159533	0.0384527	0.022143	0.00835887	0.0185217	0.000533508	8.72867e-05	0.0279078	0.00825915	0.0252788	0.0256216	0.016287	0.0174246	0.00138244	0.00210286	0.00642636	0.00732318	0.00755818	0.0227118	0.00583499			0.0515736	0.00608445	0.00417269	0.0123246	0.0143306	0.0100532	0.0100673	0.0428379	0.0102629	0.0102532	0.0384684
10	0.00787749	0.00485924	0.00321324	0.0301483	0.0143477	0.00732809	0.0199876	0.0100927	0.000520714				0.00668146	0.00186408	0.012535	0.00852473	0.0178207	0.00330831	0.00837604	0.00265125	0.00625555	0.00567637	0.00690082	0	0.000321947	0.0208453	0.00125099	0.00917318	0.0166387	0.023568	0.00459044	0.0353528	0.00109938	0.0188621			0.00749429	0.0304568	0.00477724	0.0148882	0.00248372	0.00348836	0.0163171	0.00193126	0.00247273	0.00334895	0
11	8.43515e-05	0.00783196	0.00547394	0.00924296	0.0177555	0.0300644	0.0152176	0.00309692	0.0128059				0.0110464	0.0244822	0.000656661	0.0110671	0.0032549	0.0155432	0	0.0263211	0.0141259	0.0120348	0.0200168	0.00545001	0.00947731	0.00117992	0.0039549	0.0465035	0.0139448	0.0108275	0.0131864	0.00332398	0.0178797	0.0216377			0.0245781	0.0114213	0.00502037	0.0652133	0.0103351	0.0048335	0.0208442	0.0232135	0.00361399	0.0105141	0.00943551
12	0.00684653	0.00485924	0.00207019	0.028931	0.0684934	0.0716841	0.0827932	0.0385737	0.0264387				0.00705943	0.00319754	0.00662508	0.0132332	0.0125891	0.00188907	0.0608091	0.00284673	0.0653923	0.0136591	0.0250788	0.0271148	0.0134614	0.0255549	0.00385	0.00431233	0.0472069	0.117714	0.0878408	0.0464016	0.0194508	0.00526756			0.0394323	0.00381859	0.00239191	0.199352	0.0265206	0.0969789	0.0682208	0.104644	0.0624903	0.0614533	0.00438542
13	0.0356385	0.0879936	0.0252614	0.0251355	0.0925709	0.117392	0.0664687	0.0573238	0.0860512				0.0554757	0.0133715	0.0535628	0.0425162	0.0350352	0.108734	0.0540127	0.16094	0.052823	0.0655152	0.0923617	0.0217421	0.0393111	0.0241935	0.062371	0.028737	0.169932	0.118981	0.208685	0.0257588	0.0694315	0.0655798			0.0188208	0.0576929	0.0989158	0.061107	0.0267302	0.0351539	0.12286	0.0820705	0.107143	0.11976	0.0227768
14	0.107998	0.181945	0.127069	0.0809486	0.0593778	0.0819388	0.0291134	0.0484032	0.12028				0.0476847	0.0773685	0.0406096	0.131461	0.0659677	0.119456	0.0215399	0.0960883	0.0652662	0.111024	0.0276907	0.121137	0.116887	0.0292359	0.131207	0.068801	0.063953	0.0599654	0.159715	0.0643218	0.116207	0.17557			0.0932086	0.0216234	0.0831516	0.0450646	0.0751722	0.0569529	0.110084	0.0572212	0.107777	0.0922012	0.0526457
15	0.117323	0.0766426	0.118487	0.0847516	0.0260403	0.113461	0.0239692	0.0503815	0.116093				0.0928394	0.0544136	0.0415316	0.0451445	0.0554168	0.0337193	0.055587	0.0858864	0.0772002	0.140903	0.051778	0.041078	0.0722635	0.0472676	0.102332	0.0578976	0.0494862	0.0367528	0.0633397	0.0923601	0.128021	0.0889527			0.0614049	0.0820653	0.17593	0.0606777	0.0646911	0.128477	0.101398	0.0627633	0.0621056	0.0759861	0.0947869
16	0.0344388	0.0372224	0.0764542	0.0908454	0.0828773	0.091575	0.020537	0.055543	0.0780651				0.0905532	0.07484	0.0573859	0.0675744	0.0387689	0.0128075	0.122552	0.0692663	0.0147709	0.105076	0.0430515	0.0176836	0.063665	0.0254843	0.112507	0.042111	0.03482	0.0768731	0.0101776	0.0990771	0.0516372	0.0801435			0.0560505	0.0723693	0.108418	0.0355471	0.067378	0.17855	0.0540476	0.0108763	0.0127652	0.0906708	0.0128685
17	0.0118701	0.00886097	0.045087	0.0873259	0.0141731	0.00282497	0.0195974	0.063238	0.0612348				0.106617	0.0287502	0.0975635	0.026359	0.0322415	0.00715985	0.0288629	0.0104991	0.00442253	0.063758	0.0372077	0.0520264	0.0741618	0.0730343	0.100506	0.00296556	0.0367232	0.0412709	0.00640603	0.0382135	0.0414011	0.030967			0.0319739	0.0430167	0.047411	0.00165875	0.112486	0.100847	0.0417718	0.0272182	0.0245413	0.0886458	0.122682
18	0.00496268	0.0043892	0.0945334	0.0550079	0.00325729	0.0730632	0.12194	0.043254	0.00748101				0.00745568	0.0335535	0.0656031	0.091837	0.0353076	0.0371402	0.0196563	0.0282963	0.0915589	0.0094452	0.0191476	0.0616316	0.127712	0.115148	0.0679729	0.0689526	0.0386419	0.0691746	0.10369	0.0261895	0.0945276	0.022886			0.101088	0.00687807	0.0391379	0.0322122	0.0599903	0.00912637	0.032232	0.0592729	0.0996741	0.013536	0.096589
19	0.00403481	0.0741781	0.0801658	0.014475	0.00860382	0.0738093	0.0324102	0.0241009	0.00365546				0.0170328	0.0265309	0.0313039	0.0554323	0.130732	0.09691	0.000906545	0.0342096	0.0628609	0.0467462	0.10032	0.0145527	0.0183577	0.103914	0.00227643	0.0915755	0.0416811	0.00108509	0.0657963	0.00471777	0.0334567	0.0139207			0.0186417	0.0165396	0.0141083	0.00204154	0.00656185	0.0403092	0.0323345	0.00283398	0.077635	0.0144745	0.00152805
20	0.0611642	0.0599688	0.00104462	0.0132123	0.0263052	0.00631772	0.050168	0.0362829	0.0199729				0.0369188	0.062825	0.00657111	0.00454724	0.0279631	0.00863293	0.0635125	0.0364985	0.0113036	0.0223586	0.0338097	0.00421313	0.0405519	0.0776833	0.000479939	0.0768458	0.0226479	0.00949922	0.0357221	0.0160672	0.0301028	0.0217937			0.0262524	0.0823183	0.0053095	0.0359357	0.054699	0.010317	0.0423524	0.00314583	0.0642655	0.0315074	0.0275254
21	0.0770081	0.0609532	0.0419595	0.0112654	0.14783	0.0879052	0.0733011	0.0421642	0.0931554				0.0193007	0.0662624	0.0946131	0.0803561	0.0337526	0.0120881	0.00328419	0.019304	0.038668	0.00988451	0.0241747	0.0220706	0.000710966	0.0101756	0.0762866	0.0396359	0.00674603	0.103032	0.0209729	0.0821038	0.0801875	0.0725543			0.0729104	0.0859528	0.0163425	0.0099641	0.0317866	0.0343365	0.0161084	0.0940901	0.0107067	0.0513752	0.0285806
22	0.0029523	0.0181031	0.0595719	0.00999524	0.0974537	0.0169353	0.0141187	0.070098	0.0501952				0.0784524	4.61406e-05	0.0838682	0.0109865	0.00311873	0.0163947	0.111966	0.0031929	0.0807352	0.0557637	0.0454406	0.175802	0.0264131	0.0180821	0.0466091	0.0136104	0.104015	0.0176889	0.0208325	0.0691777	0.0306674	0.026475			0.0300488	0.0795579	0.0123867	0.0776249	0.0426679	0.0202351	0.0727515	0.0218074	0.0379237	0.0268345	0.00789377
23	0.00696368	0.0135169	0.00574383	0.0298119	0.00353425	0.0359669	0.0264218	0.0229246	0.00593457				0.100728	0.00523234	0.0166189	0.0296753	0.0481383	0.101897	0.00821319	0.0417113	0.0178065	0.0115146	0.02918	0.0584233	0.00307191	0.0389072	0.00247313	0.000191758	0.00311591	0.0218375	0.00753375	0.011642	0.0341735	0.0395824			0.0026324	0.0198866	0.0769024	0.0128814	0.00419882	0.0153758	6.45096e-05	0.085167	0.0454982	0.0228079	0.074333
24	0.0599458	0.0131231	0.00198764	0.0352253	0.0165333	0.0152775	0.0469111	0.0254416	0.0392498				0.000999781	0.00603058	0.0295768	0.0336045	0.0474091	0.112903	0.0397414	0.00852798	0.0392111	0.0482202	0.159327	0.0271631	0.0724313	0.0215714	0.0531578	0.0077506	0.0199771	0.015832	0.0234295	0.0108822	0.0417799	0.0143983			0.0641716	0.0120999	0.0258378	0.0582825	0.0293537	0.0159422	0.00815097	0.0108599	0.0608629	0.0144044	0.0317395
1	0.0570263	0.0135551	0.000142881	0.0117607	0.00659285	0.000778102	0.0137843	0.0301261	0.00142869				0.0260248	0.0411805	0.021337	0.00176837	0.0484897	0.0446035	0	0.0563848	0.00893234	0.000901745	0.0207418	0.0115571	0.0348575	0.0509586	0.0133648	0.0216999	0.0061167	0.000893329	0.0208184	0.00149538	0.0046872	0.00786352			0.0130098	0.000276043	0.0151663	0	0.00303636	0.00540631	0.0198727	0.0189296	0.0232225	0.0087579	8.90789e-05
2	0.0778189	0.00491641	0.0293034	0.0032889	0.0531462	0.0177221	0.0205211	0.00229904	0.0202451				0.0045234	0.0109446	0.0376051	0.00600924	0.0248005	0.0397683	0.0146079	0.00289967	0.000994099	0.000867062	0.0138715	0.0192393	0.00127437	0.00761404	0.00359823	0.00170353	0.00376058	0.000771724	0.000168457	0.0100857	2.22846e-05	0.00252975			0.0183821	0.0622362	0.0229005	0.0348337	0.00186755	0.0257186	0.012382	0.00767581	0.003018	0.00024533	0.0233044
3	0.107543	0.00480843	0.0222482	0.0761551	0.00366069	0	0.0184348	0.0110757	0.048531				0.0277561	0.050081	0.0333053	0.00132225	0.000667672	0.0165416	0.010504	0.0165754	0.0209682	0.0375496	0.0303942	0.019993	0.0314301	0.00700895	0.0198506	0.0114386	0.00317731	0.00231985	0.00740741	0.0380794	0.0450149	0.0571488			0.0204772	0.00409464	0.0139309	0.00194874	0.00591392	0.000695097	0.00648511	0.0270432	0.00945554	0.00780773	0.0301772
4	0.0222922	0.0741145	0	0.0267309	0.0196521	0.0398487	0.0159503	0.0231549	0.00236284				0.00669975	0.00396348	0.0124271	0.0562708	0.00151105	5.87274e-05	0.000977114	0.0145269	0.0149454	0.0113759	0.00071192	0.0119437	0.0202089	0.0274206	0.0119539	0.0410987	0.00270148	0.0956517	0.001722	0.0484293	0.00571601	0.000940974			0.0297175	0.00967301	0.014174	0.00951752	0.00391297	0.0119068	0.0158466	0.00995175	0.0199551	0.00282714	0.00182954
5	0.0126293	0.00400173	0.0321578	0.0123882	0.00543685	0.00225301	0	0.0423862	0.000109899				0.0415641	0.0234487	0.0107584	0.00312287	0.0369899	0.00785479	0.0365604	0.00037875	0.00098925	0.000173412	0.0270224	0.00270568	0.00136827	0.0197562	0.0142933	0.000280948	0.00633927	0.0351252	0.0197141	0.00019505	0.00633255	0.0227063			0.00560505	0.0106392	0.00748456	0.00523724	0.00186755	0.0250621	0.00979786	0.000776882	0.0197818	0.00397591	0.00143212
day 0
	XX	XX	XX	XX	XX	XX	XX	XX	XX	XX	XX	XX	XXSRY	XXSRY	XXSRY	XXSRY	XXSRY	XXSRY	XXSRY	XXSRY	XXSRY	XXSRY	XXSRY	XXSRY	XY-	XY-	XY-	XY-	XY-	XY-	XY-	XY-	XY-	XY-	XY-	XY-	XY-SRY	XY-SRY	XY-SRY	XY-SRY	XY-SRY	XY-SRY	XY-SRY	XY-SRY	XY-SRY	XY-SRY	XY-SRY	XY-SRY
6	0.15305	0.0668492	0.171107	0.120585	0.0970574	0.0743512	0.131493	0.177953	0.0769588				0.106761	0.106761	0.0900651	0.0629563	0.106727	0.131489	0.106454	0.191537	0.0814274	0.119618	0.159603	0.174979	0.182751	0.173493	0.0649239	0.0941161	0.143798	0.121453	0.107959	0.226352	0.146611	0.119157	0.0550571		0.170975	0.128894	0.0519795	0.153827	0.145606	0.14937	0.219053	0.230781	0.189602	0.201862	0.138207
7	0.0929979	0.0394969	0.0586072	0.0615748	0.0493007	0.0476749	0.0889552	0.134431	0.0608004				0.034109	0.034109	0.0291513	0.0253842	0.0140506	0.0413357	0.0104507	0.153969	0.0711514	0.0726086	0.0111967	0.0193714	0.0222751	0.0332678	0.0250913	0.0803616	0.0706934	0.0831951	0.0261244	0.0869454	0.0373917	0.0532621	0.00690095		0.023912	0.0353049	0.00924206	0.0587604	0.07845	0.0866625	0.0381177	0.00873895	0.0591882	0.0575756	0.0128348
8	9.56623e-05	0.0063988	0.00790845	0.026141	0.000736803	0.00695602	0.0396672	0.0195788	0.00558358				0.00083248	0.00083248	0.00354121	0.014558	0.0163341	0.0079018	0.00886849	0.0634077	0.00966049	0.0244244	0.031836	0.064643	0.00435528	0.0231315	0.000927247	0.0481093	0.0155095	0.023911	0.0112017	0.00543409	0.00334453	6.19287e-05	0.00738581		0.00799888	0.0146827	0.0143869	0.0400679	0.0209872	0.0160873	0.00536643	0.0232043	0.0279469	0.0157505	0.028933
9	0.0291866	0.0111148	0.00355771	0.00911741	0.0195032	0.00861552	0.00192895	0.0026253	0.00550194				0.0106807	0.0106807	0.00706332	0.00638167	0.00484592	0.00370302	0.016469	0.0170324	0.00637277	0.0167727	0.00125226	0.00209885	0.0142722	0.00762338	0.00244051	0.00310942	0.0187793	0.0137158	0.015192	0.00920989	0.0250954	0.00932027	0.00028214		0.0338782	0.00176524	0.00347287	0.00352606	0.0269652	0.00557612	0.0515948	0.0569069	0.00358716	0.00698344	0.0347335
10	0.000698334	0.00365613	0.00570864	0.0163763	0.00146319	0.0127411	0.00688037	0.0101917	0.00763969				0.0129629	0.0129629	0.0147858	0.0248669	0.00376003	0.00483947	0.00716837	0.012629	0.0246579	0.00304576	0.0364123	0.00171177	0.0136548	0.0116426	0.0163437	0.0125705	0.00685008	0.00130748	0.00625466	0.000697332	0.000342834	0.026447	0.0117203		0.00115052	0.00907543	0.00409726	0.0141152	0.014278	0.0291978	6.42686e-05	0.00587576	0.0618598	0.0108682	0.000795687
11	0.0264458	0.00145734	0.00215092	0.0107463	0.00838081	0.00215651	0.00621522	0.0138176	0.00532348				0.00855698	0.00855698	0.0046781	0.00271841	0.00259295	0.0126879	0.0111758	0.0103835	0.00714591	0.031648	0.00268868	0.0290055	0.0190312	0.0116349	0.00325278	0.00296556	0.00749024	0.00994089	0.0245715	0.033642	0.00804516	0.00150693	0.0371735		0.0102202	0.000342665	0.00295684	0.00672909	0.00693151	0.00331933	0.0517105	0.0170463	0.00195118	0.00923568	0.00758209
12	0.00210935	0.0416329	0.00746849	0.0106251	0.065578	0.0434419	0.0261087	0.0396477	0.00420145				0.00545359	0.00545359	0.00861419	0.0112167	0.00520112	0.000819927	0.0088935	0.033826	0.0246579	0.0271004	0.00910652	0.00529874	0.0152364	0.00780013	0.0188917	0.0106119	0.0649512	0.0513223	0.0476335	0.00788326	0.0124715	0.00282464	0.00602318		0.0140255	0.0136754	0.0435425	0.0678438	0.0189913	0.0506636	0.018233	0.00774306	0.00965082	0.00355218	0.00978465
13	0.0235855	0.00162004	0.0611058	0.0311111	0.0252179	0.102708	0.0415962	0.0576018	0.00351798				0.0197303	0.0197303	0.019655	0.0153445	0.0253206	0.0816414	0.0163583	0.0456985	0.00510422	0.0956801	0.0063672	0.00860186	0.0175541	0.00380401	0.0330415	0.0339749	0.0500205	0.10209	0.134978	0.0145164	0.0695495	0.00748649	0.000606079		0.0182938	0.0216814	0.0129833	0.01803	0.0282448	0.0551509	0.0567621	0.0502843	0.0577323	0.054424	0.00780119
14	0.0207061	0.0811204	0.00974977	0.00770991	0.0254705	0.0972999	0.0916292	0.0287751	0.00636767				0.0912839	0.0912839	0.0147444	0.0329799	0.10042	0.0349136	0.0678727	0.0181074	0.039295	0.0353846	0.078561	0.137509	0.0336026	0.0128337	0.00357175	0.0441183	0.0439103	0.0517089	0.100666	0.0679559	0.139709	0.0104281	0.0516484		0.0166552	0.0480873	0.175537	0.0484067	0.0542664	0.084252	0.0693459	0.0445662	0.0638485	0.0580215	0.0187102
15	0.11115	0.067944	0.142754	0.0536812	0.0697489	0.0807744	0.101261	0.0195169	0.0509072				0.096964	0.096964	0.0334791	0.0759888	0.135173	0.0505112	0.130902	0.0954978	0.0831088	0.0142006	0.0850111	0.0182617	0.0285112	0.0182439	0.0865919	0.0528343	0.0982777	0.0678972	0.0415327	0.0507522	0.106888	0.098157	0.0473452		0.0831765	0.186482	0.204058	0.0184023	0.114101	0.0445826	0.05628	0.00558529	0.12038	0.0437977	0.0733474
16	0.0460805	0.13334	0.116883	0.150126	0.00962531	0.0803511	0.0882448	0.0863459	0.0835258				0.0635686	0.0635686	0.0728592	0.133814	0.192675	0.061872	0.154843	0.0671662	0.0295369	0.125411	0.0738604	0.0434222	0.0220709	0.0493137	0.127978	0.121076	0.042423	0.153229	0.00338454	0.108189	0.10733	0.135617	0.00423211		0.0958372	0.0842956	0.0979266	0.0482424	0.101463	0.00498777	0.064365	0.0192124	0.064764	0.0975566	0.134731
17	0.112063	0.127202	0.0599217	0.108026	0.00575644	0.0688441	0.0626683	0.0791045	0.0999482				0.102774	0.102774	0.104026	0.047976	0.0801734	0.0586571	0.114555	0.0049449	0.0879428	0.111084	0.104131	0.115514	0.163667	0.0588661	0.116203	0.0791112	0.110318	0.0951151	0.100719	0.0840881	0.116876	0.12385	0.0980218		0.149668	0.0355852	0.00019093	0.178942	0.0411148	0.127974	0.000706955	0.0527159	0.029838	0.151731	0.0309569
18	0.0435885	0.119553	0.0902464	0.0215426	0.0800434	0.0161043	0.05636	0.0769743	0.110671				0.0575884	0.0575884	0.108593	0.118876	0.0703446	0.0866909	0.015294	0.104424	0.105432	0.0760368	0.0354409	0.00637397	0.106265	0.197263	0.123663	0.0878308	0.0421393	0.004421	0.131324	0.00843602	0.00595769	0.107271	0.130067		0.0852136	0.0201134	0.065097	0.128509	0.0374489	0.103417	0.0371473	0.0301838	0.0366446	0.090626	0.153896
19	0.0017554	0.00748658	0.00130902	0.0408341	0.135845	0.0179997	0.00047093	0.00908796	0.0919459				0.178173	0.178173	0.123879	0.120381	0.0240926	0.0724814	0.0982785	0.102895	0.032652	0.00338958	0.00164359	0.164261	0.0641846	0.128214	0.113666	0.0319425	0.0821856	0.0393973	0.0163025	0.000425203	0.0851599	0.0419395	0.119558		0.076353	0.0875457	0.000722439	0.0275679	0.149257	0.00457945	0.0280147	0.000398357	0.0535223	0.0130599	0.119982
20	0.0896595	0	0.00464404	0.0435113	0.109557	0.115476	0.0931669	0.0216368	0.0272743				0.100758	0.100758	0.107516	0.0196465	0.0291263	0.0421518	0.0229981	0.0110683	0.0939253	0.100474	0.0796798	0.0788016	0.00730471	0.00389623	0.0670047	0.072376	0.0569432	0.0678819	0.0471768	0.0363888	0.00677287	0.0273243	0.0262307		0.0243254	0	0.0705772	0.0347569	0.0134974	0.0500534	0.00892691	0.00779286	0.0412148	0.0232781	6.91902e-05
21	0.0299231	0.0587095	0.0544738	0.00047195	0.0733236	0.0787063	0.0276146	0.0734877	0.0907973				0.00252576	0.00252576	0.112163	0.0747748	0.0151518	0.085806	0.057572	0.00959518	0.0515301	0.00806687	0.0491651	0.0114405	0.0765808	0.0911502	0	0.0138467	0.0326596	0.000951354	0.0592053	0.0977201	0.00283409	0.0539743	0.000459784		0.045767	0.0115156	0	0.0459374	0.034875	0.0739121	0.0675849	0.148097	0.00996601	0.0579611	0.0907257
22	0.00261158	0.000859991	0	0.0499098	0	0.0203774	0.0321856	0.00956763	0.0468387				0.0301165	0.0301165	0.020811	0.031428	0.0259549	0.0489363	0.0249125	0.00255606	0.0191408	0.000126501	0.00234339	0.0166618	0.00372835	0.00728525	0.039727	0.0467371	0.0191358	0	0.000187496	0.0620711	0	0.00385678	0.0287428		0.0229956	0.0855832	0.0542965	0.0436706	0.00286549	0.000856176	0.0434134	0.151035	0.0312864	0.00389984	0.0304264
23	0	0.00122723	0	0	0.000195266	0	0.0458904	0.0478433	0.0122664				0.0106127	0.0106127	0.0216581	0.0586649	0.0412538	0.0442226	0.00897207	0.0211094	0.0933022	0.0423098	0.0555691	0.0214874	0.00176206	0	0	0	0.0141487	0	0.000591332	0	0	0.000488549	3.76187e-05		0.0441433	0.00721673	0.00108882	0.000312089	0.0391485	0.011341	0	0.000456451	0.00094557	0.0372904	0.0191657
24	0.0340558	0.000601994	3.25898e-05	0.0428764	0.0848703	0.00784684	0.00154848	0.018243	0.00101002				0.00445122	0.00445122	0.000487235	0.0252416	0.00811882	0.0398256	0.000142867	0.00902185	0.0164611	9.73085e-05	0.0103772	0	0.0132273	0.00156003	0.00851585	0.00622252	0.0378959	0.000549445	0.0095142	0	0	0.0570845	0.00235535		0.0234388	0.00316705	0.00727083	0.0167324	0.00029643	0.00177382	0.063793	0.0579443	0.0370798	0.0294529	0.00122813
1	0.0612478	0.043848	0.00026615	0.140658	0.0631854	0.0453626	3.19275e-05	0.0256598	0.0779879				0.000141578	0.000141578	0.00917149	0.0527847	0.0480837	0.00724586	0.0663012	0	0.0152376	0.00180345	0.0401461	0.0404029	0.0324675	0.0196886	0.0184633	0.00521924	0.00252997	0.00362736	0.0162112	0.0079683	0.0004114	0.0227588	0.0179692		0.012337	0.0252222	0.0341817	0.0196836	0.0299345	0.029694	0.00453736	0.0248475	0	0	0.0358175
2	0.00409913	0.0476389	0.0903985	0.0195671	9.37276e-05	0	0.000758278	0.0216677	0.032275				0.048567	0.048567	0.0487649	0.00775935	0.00304963	0.0556749	0.00362526	0.00526341	0.0613333	0.0668282	0.0154231	0.0143737	0.0346143	0.000161382	0	0.0961263	0.0176408	0.0450596	0.0234995	0.062879	0.000617101	0.00102182	0.0416612		0.000762036	0.0636111	0.00054699	0.000624179	0.0137494	0.0111215	0.0474817	0.0100087	0.00986845	0.0183353	0.00980194
3	0.0504858	0	0	0.0220438	0.0133848	1.26358e-05	0.055325	0.00543111	0.000343634				0	0	0.000694231	0.012663	0.000218193	0.00146061	0.0345418	0.0164352	0.0015688	0.000314631	0.0743531	0	0.0484068	0.0656595	0.0393672	0.00746924	0.011956	0.0024318	0.0544747	0	0.105951	0.0657477	0.0902726		0.025466	0.0673804	0.0379693	0.0022339	0	0.000750801	0.00742945	0	0.0616272	9.06941e-05	0.000957131
4	0.0474006	0.0575335	0.0394608	0.0120702	0.0616623	0	0	0.00323907	0.061577				0.00988215	0.00988215	0.035616	0.0216364	0.0465107	0.000240258	0.0132867	0.00085202	0.0393551	0.0235746	0.0102897	0.00134189	0.00703399	0.0011143	0.0892011	0.00165614	0.000310496	0.00393769	0.000278839	0.00218554	0.00981266	0.000206429	0.123567		0.00795904	0.0455329	0.000464425	0.0230782	0.0275284	0.000158063	0.0371408	0.0213287	0.000180109	0.0146471	0.0395134
5	0.017004	0.0807091	0.0722461	0.000693308	0	0.072199	0	0.0175725	0.0367366				0.00350548	0.00350548	0.00798365	0.00195831	0.000822031	0.0248915	6.42903e-05	0.00257995	0	0	0.0255425	0.0244379	0.0674428	0.072353	0.00113495	0.047615	0.00943372	0.0568574	0.0210187	0.0262605	0.00882987	0.0302075	0.0926821		0.0054488	0.00323974	0.107411	0	0	0.0545187	0.022931	0.0252459	0.0273165	0	0
day 7
	XX	XX	XX	XX	XX	XX	XX	XX	XX	XX	XX	XX	XXSRY	XXSRY	XXSRY	XXSRY	XXSRY	XXSRY	XXSRY	XXSRY	XXSRY	XXSRY	XXSRY	XXSRY	XY-	XY-	XY-	XY-	XY-	XY-	XY-	XY-	XY-	XY-	XY-	XY-	XY-SRY	XY-SRY	XY-SRY	XY-SRY	XY-SRY	XY-SRY	XY-SRY	XY-SRY	XY-SRY	XY-SRY	XY-SRY	XY-SRY
6	0.15305	0.0668492	0.171107	0.120585	0.0970574	0.0743512	0.131493	0.177953	0.0769588				0.0597733	0.106761	0.0900651	0.0629563	0.106727	0.131489	0.106454	0.191537	0.0814274	0.119618	0.159603	0.174979	0.0447322	0.0748187	0.0268983	0.102715	0.0984678	0.0930389	0.136462	0.0895562	0.0681762	0.0342504	0.0161658		0.0487829	0.0730639	0.0231353	0.0628066	0.0513211	0.0478576	0.0747014	0.129954	0.0834221	0.0758454	0.0399648
7	0.0929979	0.0394969	0.0586072	0.0615748	0.0493007	0.0476749	0.0889552	0.134431	0.0608004				0.0879716	0.034109	0.0291513	0.0253842	0.0140506	0.0413357	0.0104507	0.153969	0.0711514	0.0726086	0.0111967	0.0193714	0.0549919	0.0379084	0.0359539	0.0908112	0.0837237	0.102848	0.0560103	0.127064	0.0438656	0.0412428	0.0228306		0.0900058	0.0711261	0.0456276	0.0594712	0.0626673	0.0620426	0.0368841	0.0143046	0.0140852	0.0340313	0.0567008
8	9.56623e-05	0.0063988	0.00790845	0.026141	0.000736803	0.00695602	0.0396672	0.0195788	0.00558358				0.0145358	0.00083248	0.00354121	0.014558	0.0163341	0.0079018	0.00886849	0.0634077	0.00966049	0.0244244	0.031836	0.064643	0.0207297	0.0105672	0.00327077	0.0753898	0.0632025	0.0772695	0.0170212	0.0185634	0.0141072	0.0209689	0.00185345		0.0256252	0.00602289	0.00221816	0.0143246	0.0279118	0.0280435	0.0058564	0.0573195	0.00748592	0.0090321	0.0283219
9	0.0291866	0.0111148	0.00355771	0.00911741	0.0195032	0.00861552	0.00192895	0.0026253	0.00550194				0.0183271	0.0106807	0.00706332	0.00638167	0.00484592	0.00370302	0.016469	0.0170324	0.00637277	0.0167727	0.00125226	0.00209885	0.000665182	0.0116292	0.00233685	0.00492518	0.00945683	0.0725534	0.00130869	0.00696383	0.0167779	0.000794581	0.0012343		0.00264186	0.00155777	0.00112266	0.00195239	0.00227694	0.00138528	0.0628709	0.0162983	0.0274325	0.00404118	0.000542201
10	0.000698334	0.00365613	0.00570864	0.0163763	0.00146319	0.0127411	0.00688037	0.0101917	0.00763969				0.0107213	0.0129629	0.0147858	0.0248669	0.00376003	0.00483947	0.00716837	0.012629	0.0246579	0.00304576	0.0364123	0.00171177	0.0072292	0.00179321	0.0567074	0.00153321	0.000734694	0.00484708	0.00338696	0.00170862	0.0394914	0.00142217	0.00139608		0.0106546	0.00327347	0.00282174	0.00893874	0.000567086	0.0152892	0.0433959	0.0137258	0.0139602	0.00315518	0.000741959
11	0.0264458	0.00145734	0.00215092	0.0107463	0.00838081	0.00215651	0.00621522	0.0138176	0.00532348				0.000388704	0.00855698	0.0046781	0.00271841	0.00259295	0.0126879	0.0111758	0.0103835	0.00714591	0.031648	0.00268868	0.0290055	0.000404431	0.00141429	0.0685989	0.00501444	0.00190267	0.00245629	0.0105765	0.00739269	0.0173457	0.003146	0.0324593		0.0251356	0.00260585	0.0303149	0.0299835	0.00679644	0.0304025	0.0106376	0.0385774	0.0233563	0.0218568	0.0447801
12	0.00210935	0.0416329	0.00746849	0.0106251	0.065578	0.0434419	0.0261087	0.0396477	0.00420145				0.0380117	0.00545359	0.00861419	0.0112167	0.00520112	0.000819927	0.0088935	0.033826	0.0246579	0.0271004	0.00910652	0.00529874	0.00561946	0.00769054	3.68115e-05	0.000976635	0.115768	0.0630393	0.0508126	0.0781201	0.119539	0.0825717	0.0224551		0.00728128	0.00599417	5.43223e-05	0.0892435	0.0786832	0.0791827	0.104225	0.134052	0.175603	0.131415	0.0933726
13	0.0235855	0.00162004	0.0611058	0.0311111	0.0252179	0.102708	0.0415962	0.0576018	0.00351798				0.0299563	0.0197303	0.019655	0.0153445	0.0253206	0.0816414	0.0163583	0.0456985	0.00510422	0.0956801	0.0063672	0.00860186	0.0542363	0.0310664	0.0439625	0.11822	0.138298	0.128862	0.128462	0.153688	0.155552	0.0793718	0.0397972		0.0689837	0.0194183	0.0558131	0.113951	0.0979813	0.142006	0.0949256	0.0749591	0.139923	0.159442	0.0101439
14	0.0207061	0.0811204	0.00974977	0.00770991	0.0254705	0.0972999	0.0916292	0.0287751	0.00636767				0.147757	0.0912839	0.0147444	0.0329799	0.10042	0.0349136	0.0678727	0.0181074	0.039295	0.0353846	0.078561	0.137509	0.0725926	0.141605	0.0879494	0.140514	0.0221853	0.034006	0.0984769	0.160862	0.0553643	0.0640378	0.0774614		0.0721067	0.0966462	0.0887866	0.0715863	0.045165	0.118272	0.0205714	0.0544439	0.00082714	0.0338273	0.112108
15	0.11115	0.067944	0.142754	0.0536812	0.0697489	0.0807744	0.101261	0.0195169	0.0509072				0.14315	0.096964	0.0334791	0.0759888	0.135173	0.0505112	0.130902	0.0954978	0.0831088	0.0142006	0.0850111	0.0182617	0.0876338	0.115604	0.08507	0.0571436	0.0553658	0.0780392	0.0751509	0.00184477	0.0167158	0.0164276	0.0663786		0.0245307	0.0627702	0.0795669	0.0279026	0.0138893	0.0258577	0.0796609	0.0121364	0.0615	0.00733658	0.107565
16	0.0460805	0.13334	0.116883	0.150126	0.00962531	0.0803511	0.0882448	0.0863459	0.0835258				0.12243	0.0635686	0.0728592	0.133814	0.192675	0.061872	0.154843	0.0671662	0.0295369	0.125411	0.0738604	0.0434222	0.0356085	0.128871	0.0544701	0.0256393	0.000904239	0.0143939	0.0521377	0.0702033	0.133779	0.060213	0.0662668		0.0334157	0.00160084	0.00122225	0.0265071	0.0253814	0.000187354	0.0694371	0.0117597	0.00683134	0.0469516	0.101304
17	0.112063	0.127202	0.0599217	0.108026	0.00575644	0.0688441	0.0626683	0.0791045	0.0999482				0.0219879	0.102774	0.104026	0.047976	0.0801734	0.0586571	0.114555	0.0049449	0.0879428	0.111084	0.104131	0.115514	0.0953605	0.0469918	0.0133135	0.014702	0.0379592	0.0348084	0.0535781	0.0263101	0.030335	0	9.58681e-05		0.0461073	0.0675152	0.0482774	0.0306139	0.0353398	0.0979579	0.0495363	0.0864616	0.059804	0.106696	0.0812977
18	0.0435885	0.119553	0.0902464	0.0215426	0.0800434	0.0161043	0.05636	0.0769743	0.110671				1.74046e-05	0.0575884	0.108593	0.118876	0.0703446	0.0866909	0.015294	0.104424	0.105432	0.0760368	0.0354409	0.00637397	0.118841	0.00125418	0	0.00226306	0.0201507	0.0376468	0.0276101	0	0.0681318	0.0450594	0.0136073		0.00450156	0.000294325	0.0535285	0.00244813	0.014306	0	0.0552477	0.00986715	0.0452131	0	0
19	0.0017554	0.00748658	0.00130902	0.0408341	0.135845	0.0179997	0.00047093	0.00908796	0.0919459				0.109849	0.178173	0.123879	0.120381	0.0240926	0.0724814	0.0982785	0.102895	0.032652	0.00338958	0.00164359	0.164261	0.036444	0.0724011	0.0466715	0.0765661	0.00202198	0	0	0	0.000425879	0	0.113434		0.0358859	0.0298273	0.0131852	0.0160016	0.0623192	0.0226727	0.000129874	0.0313011	0.0393695	0.0642318	0
20	0.0896595	0	0.00464404	0.0435113	0.109557	0.115476	0.0931669	0.0216368	0.0272743				0.0289468	0.100758	0.107516	0.0196465	0.0291263	0.0421518	0.0229981	0.0110683	0.0939253	0.100474	0.0796798	0.0788016	0.00069445	0.0384047	0.10261	0	0.000860283	0.0774168	0.1277	0	0.095814	0	0.00926126		0.0368059	0	0.0193025	0.0268346	0.0679601	0.018355	0.0874744	0.0778164	0	0.06478	0.0680566
21	0.0299231	0.0587095	0.0544738	0.00047195	0.0733236	0.0787063	0.0276146	0.0734877	0.0907973				9.57255e-05	0.00252576	0.112163	0.0747748	0.0151518	0.085806	0.057572	0.00959518	0.0515301	0.00806687	0.0491651	0.0114405	0.0832967	0.000757847	0.0440634	0.0559675	0.0573313	0.0292026	0.0437012	0	0	0.0135671	0		0.0337786	0.0535528	0.000745422	0.000226452	0.027233	0.0170067	0.0108701	0.00431802	0.0556624	0.0521975	0
22	0.00261158	0.000859991	0	0.0499098	0	0.0203774	0.0321856	0.00956763	0.0468387				0.0432244	0.0301165	0.020811	0.031428	0.0259549	0.0489363	0.0249125	0.00255606	0.0191408	0.000126501	0.00234339	0.0166618	0.00161506	0.0292732	0	0.0251352	0.0286531	0.000131002	0	0.00978884	0	0.0226442	0		0.0808762	0	0.0645741	0.0186303	0.000451091	0.0156753	0.0627532	0.00678022	0.000345138	0.0141122	0
23	0	0.00122723	0	0	0.000195266	0	0.0458904	0.0478433	0.0122664				0.0152175	0.0106127	0.0216581	0.0586649	0.0412538	0.0442226	0.00897207	0.0211094	0.0933022	0.0423098	0.0555691	0.0214874	0.0141577	0.031504	0	0	0	0.000524009	0.00169142	0.0642606	0.000558966	0.00349616	0.000229684		0.00236895	0.0318876	0.00024445	0.00485036	0.00335956	0	0.00760214	0.0572919	0.0782094	0.0246295	0.00136977
24	0.0340558	0.000601994	3.25898e-05	0.0428764	0.0848703	0.00784684	0.00154848	0.018243	0.00101002				0.000110229	0.00445122	0.000487235	0.0252416	0.00811882	0.0398256	0.000142867	0.00902185	0.0164611	9.73085e-05	0.0103772	0	0.0672951	0	0.0422051	0	0.00187127	0	0	0.00688214	0.00021294	0	0.0337995		0.0169709	0	0.00240829	0.018055	0.0726383	0.00754243	0.00551208	0.000771732	0.0941987	0.0350894	0
1	0.0612478	0.043848	0.00026615	0.140658	0.0631854	0.0453626	3.19275e-05	0.0256598	0.0779879				0.0176512	0.000141578	0.00917149	0.0527847	0.0480837	0.00724586	0.0663012	0	0.0152376	0.00180345	0.0401461	0.0404029	0.00284166	0.00461112	0.0626696	0.0644474	0.000885401	0.0753809	0	0.000449279	0.0119335	0.000455201	0.0308174		0.038283	0.000689151	0.014495	0.0140553	0.0160631	0.00890784	0.0457941	0.0464509	0.0288309	0.0147497	0
2	0.00409913	0.0476389	0.0903985	0.0195671	9.37276e-05	0	0.000758278	0.0216677	0.032275				0.000380001	0.048567	0.0487649	0.00775935	0.00304963	0.0556749	0.00362526	0.00526341	0.0613333	0.0668282	0.0154231	0.0143737	0.000494895	0.00385861	0	0.0515726	0.0114537	6.55011e-05	0.0447342	0.0162353	0.065124	0.064221	0.0646171		0	0.0240126	0.0719891	0.00807578	0.0205354	0.00700307	0.0165513	0.00508057	0.000136865	0.0267584	0.0340673
3	0.0504858	0	0	0.0220438	0.0133848	1.26358e-05	0.055325	0.00543111	0.000343634				0.0292514	0	0.000694231	0.012663	0.000218193	0.00146061	0.0345418	0.0164352	0.0015688	0.000314631	0.0743531	0	0.0232362	0.0145058	0.00032994	0.00119191	0.0456389	0.00041484	0.00741592	0.00228724	0.0231128	0.149343	0.120768		0.0888778	0.0125985	0.143848	0.0781413	0.0385834	0.133385	0.00124739	0.0803153	0.0407738	0.0136214	0
4	0.0474006	0.0575335	0.0394608	0.0120702	0.0616623	0	0	0.00323907	0.061577				0.00598139	0.00988215	0.035616	0.0216364	0.0465107	0.000240258	0.0132867	0.00085202	0.0393551	0.0235746	0.0102897	0.00134189	0.0654752	0.167639	0.119779	0.0747126	0.0369105	0.0728646	0.0273385	0.0797403	0	0.163333	0.137862		0.127265	0.204455	0.111376	0.143751	0.0725484	0.0447464	0.0488295	0.0138636	0.00302888	0.0440259	0.0985702
5	0.017004	0.0807091	0.0722461	0.000693308	0	0.072199	0	0.0175725	0.0367366				0.0542648	0.00350548	0.00798365	0.00195831	0.000822031	0.0248915	6.42903e-05	0.00257995	0	0	0.0255425	0.0244379	0.105804	0.0258308	0.103103	0.0105592	0.166254	0.000191045	0.0364252	0.0780793	0.0236363	0.133433	0.127209		0.079115	0.231088	0.125342	0.131648	0.156022	0.076222	0.00528556	0.0221506	0	0.0121745	0.121093
day 14
	XX	XX	XX	XX	XX	XX	XX	XX	XX	XX	XX	XX	XXSRY	XXSRY	XXSRY	XXSRY	XXSRY	XXSRY	XXSRY	XXSRY	XXSRY	XXSRY	XXSRY	XXSRY	XY-	XY-	XY-	XY-	XY-	XY-	XY-	XY-	XY-	XY-	XY-	XY-	XY-SRY	XY-SRY	XY-SRY	XY-SRY	XY-SRY	XY-SRY	XY-SRY	XY-SRY	XY-SRY	XY-SRY	XY-SRY	XY-SRY
6	0.0928637	0.0212397	0.033352	0.0893069	0.0925781	0.0281131	0.109059	0.0866701	0.0191852				0.0508744	0.0428604	0.0526861	0.0590493	0.0310397	0.017474	0.0772033	0.0605308	0.0253937	0.202672	0.0843988		0.0318483	0.0680029	0.0207567	0.0887363	0.111111	0.0517534	0.0659732	0.112953	0.174951	0.0223376	0.0215109		0.047564	0.147526	0.0354589	0.0670817	0.0350824	0.0417544	0.0694467	0.15448	0.14779	0.076862	0.033832
7	0.136226	0.0530114	0.0639097	0.167227	0.0485589	0.0334458	0.068144	0.114059	0.0696971				0.0397546	0.0258627	0.0944162	0.0754331	0.0748859	0.0459333	0.062449	0.0765132	0.0604412	0.0674885	0.134451		0.0539022	0.0556764	0.0429268	0.0919767	0.106381	0.0381738	0.0253073	0.127556	0.0347235	0.0565396	0.0910808		0.102672	0.112737	0.0957783	0.068407	0.0391059	0.0399463	0.073255	0.0652976	0.144076	0.0694182	0.081501
8	0.059373	0.150053	0.017129	0.161675	0.0738997	0.0326666	0.0305793	0.0917416	0.0697936				0.00608063	0.0773354	0.0336599	0.0674913	0.0750525	0.0585259	0.0723575	0.00525375	0.00303728	0.0334795	0.152171		0.0148511	0.00376041	0.0304556	0.0680662	0.0869968	0.0395728	0.00788919	0.10522	0.02032	0.0110877	0.0417955		0.00994843	0.0108194	0.0439129	0.0225837	0.0176935	0.0604939	0.0546178	0.0251387	0.0693513	0.0359877	0.0812688
9	0.00567005	0.0936427	0.00214859	0.0379989	0.0371334	0.000684848	0.00467738	0.00817331	0.00549101				0.00533208	0.0729015	0.0014214	0.0032846	0.000654052	0.0616842	0	0.00436508	0.00177036	0.0832211	0.122585		0.0128798	0.00342513	0.000601581	0.00248234	0.0136655	0.000582914	0.00526145	0.0997005	0.0246162	0.00206841	0.00546379		0.000703295	0.00171061	0.000608049	0.00207043	0	0.00732984	0.0024572	0.00537878	0.0174606	0.0122634	6.53199e-05
10	0.00607935	0.00258388	0.00148122	0.00329486	0.00474739	0.000270504	0.00254572	0.00534691	0.0079753				0.00056955	0.000746234	0.000303975	0.00375033	0.0023262	0.0216837	0.00303889	0.007137	0.00842581	0.0602608	0.0518745		0.0137239	0.00179474	0.00728839	0.00151162	0.00145065	0.00563328	0.0183288	0.00303271	0.01625	0.000489805	0.000632984		0.0171604	0.00161255	0.00712057	0.00781668	0.00203082	0.00169206	0.0105536	0.00886487	0.00496322	0.00564249	0.00477198
11	0.00107141	0.000455733	0.0836431	0.00110189	0.0034628	0.00611425	0.00775218	0.00321793	0.00121899				0.0489922	0.000981429	0.00811741	0.0415625	0.000780543	1.01366e-05	0.00857286	0.0664478	0.0683692	0.0380831	0.00710691		0.0128927	0.00928927	0.00123051	0.00361726	6.30716e-05	0.011621	0.0290034	0.0188104	0.0101977	0.0146661	0.000389325		0.00904906	0.00415123	0	0.0233163	0.0109664	0.0279824	0.00939012	0.00624424	0.00373134	0.015711	0.00885084
12	0.00611547	0.00499216	0.00526839	0.003068	0.0266492	0.0936395	0.033102	0.00556103	0.0274217				0.0326054	0.00105983	0.0127027	0.00272573	0.0157929	0.00808178	0.0814741	0.015531	0.0837437	0.0879513	0.0304761		0.0488713	0.00824398	0.0333099	0.000748565	0.0581205	0.159467	0.0942268	0.0802836	0.141494	0.00433337	0.00348273		0.0151741	0.0501308	0.0193456	0.0210993	0.0315158	0.126401	0.118228	0.122887	0.111503	0.063196	0.00885447
13	0.0281336	0.000635518	0.000613108	0.0733511	0.0929093	0.0915398	0.0736649	0.076068	0.0513587				0.00334679	0.0464117	0.0462684	0.0407928	0.0440128	0.0579192	0.010812	0.0158902	0.0505715	0.080413	0.0021679		0.0379447	0.0654851	0.0813943	0.132742	0.0468307	0.116182	0.098042	0.136146	0.142089	0.0566582	0.0964544		0.048847	0.0208978	0.0598395	0.0229468	0.0521285	0.0574141	0.105322	0.0969798	0.138247	0.0187238	0.0787431
14	0.115785	0.0823915	0.00772081	0.0469004	0.0840807	0.0466298	0.124579	0.095914	0.0371866				0.0806917	0.107275	0.0717124	0.141576	0.113891	0.0935827	0.0346993	0.0353121	0.00338582	0.00200256	0.0349911		0.0432974	0.105075	0.104856	0.182655	0.00900873	0.0201222	0.0813678	0.00520111	0.0507624	0.0467404	0.095591		0.0487234	0.00619961	0.0903539	0.00986801	0.0427868	0.00364862	0.0336442	0.035783	0.0153182	0.0521025	0.0122983
15	0.0457216	0.0056444	0.0885913	0.033089	0.00642693	0.0309577	0.0110187	0.0842475	0.0289315				0.0947515	0.0359238	0.0187052	0.0406017	0.0445866	0.0742681	0	0.063791	0.0414099	0.00848209	0.0975141		0.0654337	0.121885	0.0461051	0.0697373	0.00157679	0.00139899	0.03883	0.0466128	0.0173052	0.0490335	0.0976967		0.0959847	0.0164197	0.000960077	0.0490215	0.00198005	0.0485697	0.0612615	0.0140172	0.0188353	0	0.0416959
16	0.00551356	0.051548	0.046059	0	0.0337504	0.0796634	0.043998	0.00680293	0.0461344				0.000222396	0.0366758	0.00136575	0	0.0101933	0.0503442	0.0276219	0.000299294	0.00276066	0.0621713	0.013103		0.0383436	0.0136348	0.00142613	0	0.0917902	0.0453554	6.24945e-05	0.000909814	0.0972437	9.6713e-05	0.0174984		0.0179447	0.035912	0.000154679	0.00393701	0.0327342	0.0608055	0.052612	0.0612696	0.0356888	0.0532465	0
17	0.163432	0	0.0582073	0.0369888	0.00202662	0.00404683	0.0210175	0.0653681	0.0665016				0.0442459	0.00504361	0.0279143	0.0859144	0.0320085	5.21312e-05	0.000431842	0.0650711	0.0946203	0	0.00418651		0.0395762	0.0286764	0.0399315	0.0743204	0.00674866	0	0.113722	0.00381364	0.000685876	0	0.0431197		0.0330932	0.0163217	0.033416	0.00944118	0.0049755	0.014714	0.0348776	0.00503098	0	0.119937	0.0485944
18	0.038005	0	0	0.0213896	4.78729e-05	0.0512284	0.0172756	0.0973761	0.0408415				0.000222396	0.0515714	0.000667888	9.31455e-05	0.00971206	0.0749704	0.0368025	6.90678e-05	0.039291	0.0433311	0.0372247		0.0710591	0.0169876	0	0.0245964	0.0014927	0.0711108	0.0650151	0.114189	0.0820489	0.0497542	0.00859693		0	0	0.0219964	0.0210356	0.00255121	0.0190909	0.0231892	0.0939548	0.0464186	0.114154	0.00128462
19	0	0.0690164	0.0518212	0	0.00999745	0.112105	0.0437987	0	0.0329366				0.0373625	0	0.0794273	0.0710749	0.0729484	0.0237935	0.0238952	0.0405658	0.000702612	0.00032225	0.0263911		0.0667203	0.00209058	0.000197723	0.000376697	0.00747398	0.0410231	0.00540429	0.00155427	0.00167324	0.0577252	0.0471057		0.0661609	0.0466333	0.0153079	0.0177866	0.0424314	6.52186e-05	0.0338572	0.00372875	0	0.0372611	0
20	0	0.00441936	0	0	0.0899212	0.00961148	0	0.0433075	0.0527796				0.0668598	0.0342687	0.00234617	0.0010148	0	1.88251e-05	0	0.0929652	0.0274738	0.0172059	0.00260387		0.0465064	0.135322	0	0.0598997	0.0769684	0	0.0501177	0.00464763	0.000942138	0.0296909	0.00392238		0.0106261	0	0	0.00830085	0	4.34791e-05	0.00660233	0.0715985	0.025191	0.0382447	2.17733e-05
21	0	0	8.1386e-05	0	0.0200747	0	0	0.0441456	0.0424052				0	0	0.00154984	0.0012256	0.0126522	0.0502153	0.0441038	0.00415327	0.0447238	0.047037	0.00750107		0.0354897	0.0139372	0	0	0.0116052	0	0.0190995	0.061185	0.0773759	0.0319122	2.64847e-05		0.00802182	0.00346481	0.00105075	0.00230615	0.0027416	0.00226091	0.0425003	9.70607e-05	0.0532297	0.0149914	0.0296879
22	0	0.0286861	0.0627811	0.0689436	0	0	0.00250738	0	0.0297911				0.0105068	0	0.011915	0.0187958	0.0177149	0.00368828	0	0.0184549	0	0.000138107	0		0.016655	0.000953251	0.0562668	0.0302613	0	0	0	0.00029569	0	0.000265181	0.000402567		0.00171348	0.00743082	0.0477478	0.0272023	0	0.121325	0.016215	0.0640681	0.00889096	0.0119683	0
23	0	0.0239114	0.0142968	0.00744854	0.00392956	0	0.0467815	0.000446595	0.0120936				0	1.74218e-05	0.0134562	0.0157318	0.00751852	0.00813536	0.0147146	0.0500558	0.00806621	0.000276215	0		3.86009e-05	0	0.0148376	0.0314252	0.00605487	0.0155242	0.00486862	0.00042458	0.0459462	5.92757e-05	0		0.009113	0.00226629	0.000293357	0.00381597	0.00302084	0.00193119	0.0102166	0.0073847	0.00507034	0	0
24	0.0493451	0	0.00515987	0.00242523	0.0302197	0.0360951	0.00552084	0.0185796	0.00175994				0	0.038116	0	0.0103293	0.00137289	0.000451803	0.114149	0.000414407	0	0	0.0237395		6.17615e-05	0	0.00622406	0	0.0060759	0.0714139	0.102885	0.00364684	0.000135668	0.0321836	0.000476724		0.0172414	0	0.028669	0	0.00473434	0.0314751	0.000619862	0.0346587	0	0.00949388	3.62888e-05
1	0.0716883	0	3.25544e-05	0	0.0138073	0.0495366	0.00773684	0.000899308	0.000492783				1.62729e-05	0	0.0269682	0.0140503	0.0933484	0.000434426	0.0475745	0.0964831	9.95829e-05	0.108403	0.0220613		0.0236264	0.00262966	0.000279756	0	0.00037843	0	0.00713034	0.00272944	0.0164233	0.0835944	0.0235396		0.0451729	0.00108956	0.00837934	0.0318019	0.0180616	0.0173336	0.0215935	0	0.0240216	0.000657428	0.00151687
2	0.00665719	0.057736	0.00361354	0.00551484	0.000123672	0.00906619	0.00142622	0.0232658	0.0474609				0.0678579	0.000394894	0.0150489	0.005324	0.000944057	0.0447256	0.0441118	0.0442586	0.011441	0	0.0183585		0.0261766	0.0558211	0.00912469	0.0249296	0.00909282	0.00829137	0.0561737	0.0541492	0	0.000773704	0.00915046		0.0881719	0	0.0381577	0.0402365	0.0811439	0.00965597	0	4.85303e-05	0	0.00162545	0.0705237
3	0.011942	0.0693467	0.001644	0.0442861	0.00913973	0.0256163	0.0467584	0.000660716	0.0282609				0.0866693	0.106151	0.11414	0.0399447	0.0721525	0.10657	0.0214641	0.0360856	0.0247961	0.0366559	0.0268271		0.0281555	0.00222864	0.173682	0	0.001766	0.029626	0.000208315	2.27454e-05	0.0323794	0.109904	0.0908239		0.0654192	0.060961	0.0214684	0.0671394	0.0872236	0.0480625	0.0747713	0.0181746	0.0800632	0.0197384	0.0781734
4	0.0322507	0.0842898	0.191137	0.0356763	0.177106	0.147156	0.185508	0.0505509	0.151938				0.152845	0.146004	0.163123	0.0823553	0.122129	0.110477	0.166843	0.0638739	0.161136	0.00134655	0.0104274		0.15489	0.106034	0.188814	0.000927254	0.167466	0.127915	0.015079	0.0134501	0.0124362	0.200695	0.159334		0.134479	0.122935	0.207115	0.236705	0.186797	0.0939945	0.0041642	0.00156106	0.0126134	0.101741	0.231279
5	0.124127	0.196396	0.261308	0.160314	0.13941	0.111813	0.112548	0.0775975	0.128344				0.170192	0.1704	0.202083	0.177878	0.144283	0.0869591	0.10768	0.136478	0.23834	0.0190588	0.0898397		0.117056	0.179047	0.14029	0.11099	0.177883	0.145234	0.0960036	0.00346488	0	0.139392	0.141905		0.107016	0.33078	0.222866	0.23608	0.300294	0.16401	0.140604	0.103354	0.0375366	0.127034	0.187
day 21
	XX	XX	XX	XX	XX	XX	XX	XX	XX	XX	XX	XX	XXSRY	XXSRY	XXSRY	XXSRY	XXSRY	XXSRY	XXSRY	XXSRY	XXSRY	XXSRY	XXSRY	XXSRY	XY-	XY-	XY-	XY-	XY-	XY-	XY-	XY-	XY-	XY-	XY-	XY-	XY-SRY	XY-SRY	XY-SRY	XY-SRY	XY-SRY	XY-SRY	XY-SRY	XY-SRY	XY-SRY	XY-SRY	XY-SRY	XY-SRY
6	0.0590809	0.0283508	0.0495805	0.0582836	0.0940592	0.0755433	0.0897978	0.0186393					0.0533951	0.0174162	0.0454654	0.0460019	0.0269299	0.0385789	0.0987016	0.0518531	0.0266162	0.140606	0.0883807		0.048855	0.0575394	0.0163644	0.0740331	0.0764161	0.0527137	0.111587	0.110301	0.0351846	0.0326125			0.0840038	0.052928	0.0314519	0.0325121	0.0443357	0.109251	0.140549	0.0634934	0.0342956
7	0.10407	0.0444938	0.0778362	0.121223	0.0525295	0.0712866	0.104207	0.0949331					0.0566739	0.0676787	0.0941734	0.103636	0.0486849	0.0466248	0.0643104	0.0871013	0.0911888	0.045792	0.143187		0.0718419	0.117185	0.0469889	0.047636	0.0570362	0.031833	0.0943593	0.133939	0.0415989	0.112024			0.0610374	0.0638259	0.0791461	0.0948495	0.0645238	0.0668529	0.121153	0.0774055	0.0923811
8	0.138925	0.0924944	0.129976	0.12356	0.0544458	0.0723755	0.0248193	0.0683074					0.0287253	0.0788921	0.0352888	0.108023	0.0583568	0.0514587	0.0937293	0.0128996	0.024682	0.0189196	0.0842327		0.0293146	0.0900862	0.0648129	0.0927732	0.0845796	0.0147357	0.0656624	0.0292644	0.00282179	0.0551362			0.0268862	0.0509076	0.0800445	0.0501284	0.0886019	0.0143118	0.0604777	0.0320992	0.065852
9	0.0551091	0.126415	0.131421	0.0704365	0.0025586	0.00181496	0.0373347	0.00981842					0.00412297	0.0614586	0.00257907	0.0406878	0.0189277	0.0134381	0.00831242	0.00760544	0.00271245	0.0475228	0.0582961		0.0131869	0.00427068	0.00546718	0.0365029	0.00293363	0.00306382	0.0209721	0.00453891	0.00846536	0.00261615			0.0147279	0.0279566	0.000166682	0.00322758	0.0304691	0.0263851	0.0065952	0.0113706	0.00826134
10	0.00280314	0.052299	0.00165724	0.00562891	0.0197035	0.0040919	0.00281984	0.0138295					0.000484749	0.00642781	0.00315774	0.00363058	0	0.00442048	0.00415149	0.0114823	0.00109308	0.0432629	0.0106129		0.0109748	0.00314561	0.00106853	0.00203226	0.00420475	0.0100474	0.00391682	0.0144822	0.000834975	0.000780831			0.0144863	0.00155275	0.00202334	0.00269409	0.000156464	0.00820459	0.00619268	0.0131103	5.20946e-05
11	0.00450473	1.19071e-05	0.00726164	0.00133964	0.00597194	0.00270594	0.00323342	0.0401317					0.0282822	0.00290847	0.0128105	0.000723923	0.000933732	0.0449116	0.0210122	0.0102734	0.0132564	0.0154803	0.00146653		0.0317534	0.00698004	0.00431562	0	0.0139525	0.00518439	0.00154105	0.0327362	0.00343838	0.000897591			0.000641374	6.38117e-05	0.0187101	0.0261598	0.00214051	0.0161272	0.0874593	0.0151627	0.0027176
12	0.00300912	0.0204058	0.00234386	0.0295563	0.127746	0.0420658	0.0445911	0.0288882					0.00142819	0.0200996	0.00180086	0.0377592	0.0185757	0.0162021	0.0509218	0.00847159	0.00243806	0.0909647	0.00406439		0.0178527	0.00270362	0.034101	0.0362587	0.0784552	0.0740452	0.0850538	0.0724454	0.0105935	0.0461347			0.0144903	0.00516875	0.00566256	0.0853498	0.0888126	0.0998475	0.0502227	0.0769165	0.00151074
13	0.00806015	0.0687933	0.0139948	0.0132883	0.0460158	0.215377	0.095663	0.025361					0.0259158	0.0705872	0.0598574	0.0496271	0.0623768	0.0296813	0.0405242	0.0596995	0.0355048	0.0998277	0.0521247		0.0663249	0.0554041	0.0968053	0.110841	0.0493798	0.0948876	0.138472	0.106268	0.103267	0.0793346			0.0339651	0.0465684	0.0456246	0.0462912	0.0848967	0.0206745	0.122107	0.100084	0.0635989
14	0.0423964	0.0613871	0.110582	0.0567757	0.0646243	0.0422638	0.0778934	0.0259489					0.072238	0.0123115	0.0207473	0.0480586	0.0782705	0.0968467	0.00283056	0.0541367	0.0359097	0.0215233	0.118759		0.0377613	0.147534	0.0979526	0.0113163	0.00107355	0.0649236	0.0626741	0.0636725	0.083596	0.0791084			0.10437	0.0605431	0.0604038	0.0628405	0.0656147	0.00477647	0.00184542	0.0324915	0.0270284
15	0.0591302	0.000169676	0.0194734	0.0218849	0.000128489	0.00236769	0.0191655	0.0273532					0.0441434	0.0289362	0.0450065	0.00936712	0.00022107	0.0270277	0.0682638	0.0084577	0.00288789	0.0724778	0.0197353		0.0241134	0.070759	0.00171532	0.0319387	0.0188506	0.00203323	0.000572953	0.00249812	0.000603751	0.0399611			0.0211772	0.0443349	0.0623901	0.0530855	0.0053089	0.0573529	0.000885553	0.0359255	0.0252051
16	0.019828	0	0.0139553	0.00361043	0.00150835	0.0793962	0.0500945	0.03178					0	0.0356163	0.00621072	0.028765	0.0311651	0.000744635	0	0.0302597	0.0661245	0.0332137	0.000383094		0.0382595	0.0325582	0.0102723	0.00033871	1.11829e-05	0.0891547	0.0142399	0.0410419	0.00274899	0.000470688			0.0323023	0.0255176	0.000671359	0.0441229	0.0736248	0	0.0427852	0.0211778	0.013601
17	0.00815418	0.0619795	0.0266272	0.0551898	0.0308262	0	0.0275921	0.0135267					0.00365907	0.0527926	0.0182281	0.00847867	0.00381637	0.0837746	0.0640085	0.0476985	0.000341868	0.00469259	0.0171913		0.0468401	0.0220422	0.0356131	0.00121603	0.0806954	0.0582857	0.103102	0.0579731	0.0484671	0.0632656			0.00526956	0.0166336	0.0052366	0.0409639	0.0291718	0.0378768	0.00504084	0.0796114	0.0739396
18	0.0527447	0	0	0.00416311	0.00967577	0.0221672	0.0381384	3.56278e-05					0.0542293	0.00861906	0.00209518	0.0547439	0.00281574	0.020367	5.66112e-05	0.0620293	0.0159913	0.0616677	6.58443e-05		0.000855086	0.0178175	0.0552858	0.0299453	9.31905e-05	0.0376392	9.8785e-05	0.0714128	0.000372527	0.00152882			0.0943334	0.00960721	0.0314335	0.010803	0.0199991	0.0884528	0.0131471	0.0147761	0
19	0.00202399	0.0234123	0	0	0.111673	0.00138597	0.0575201	0					3.64865e-05	0.00896036	0.0568592	0.000131622	0.0528126	0	0.0295888	0.000704036	0.0377989	0.0454637	0.0839754		0.0566512	0.0570286	0.121045	0.0960104	0.00559888	0.0369056	0	0.000255713	0	0			0.0673324	0.0193066	0.000495417	0.0477392	0.0274963	0.048549	0.0342951	0.0377334	0.00130671
20	0	0.00506052	0	0	0.107964	0.00320917	0.000126893	0.00191499					0.0799992	0.000289363	0.0166916	0.000197433	0	0.0368153	0.0645369	0.0900935	0.0219066	0.0386747	0.00912841		0.108607	0.0464724	0.00957302	0.00723507	0.021281	0.000597393	0.0482614	0	0	0			0.0625973	0	0.0012316	0.00638656	0.00533497	0.100447	0.00018578	0.0529473	0.0470198
21	0	0	0.0411146	0	0	0.0518088	0.0191232	0.0802218					0.0180869	0.0561758	0	0.047214	0.00223397	0	0.0177005	0.0162392	0	0.0153237	0.000107745		0.0313594	0.00114229	0	0	0	0.0773745	0.0178208	0.0629251	0	2.919e-05			0.00892776	0	0.0730205	0	0.0300932	0.000343694	0.0314526	0.0850295	0
22	0.0192593	0.0138718	0.0303264	0	0	0.000767232	0.0736213	0.00909399					0	0.00381365	0.021735	0	0.0159723	0.0327103	0.00613288	0.000435391	0	0.060683	0		1.85888e-05	0	0	0	0	0.0157278	9.38457e-05	0.00133266	0.0830565	0			0.00437084	0.0379113	0.000888972	0.000876438	0.0242193	2.6438e-05	0.000371561	0.00930116	0
23	0.0226445	0.0171045	0.00144514	0	0.0220834	0	0.00714829	5.34417e-05					0.0108104	0.0019464	0.00150654	0	0	0	0.000169834	0.0297687	0	0.006595	0		0.0297533	0	0	0.0322052	0.017203	0.0125907	0.000419836	0.0581796	0.013578	0			0.00720952	0	0.0262339	0.00156616	0.0124693	0.0663946	0.00299107	0.0183181	0.00710658
24	0.00158516	0.00157769	0.00783683	0.0582294	0.0272676	0.00877779	0.00199269	5.34417e-05					0	0.00417474	0.000683428	0.00524295	0.000919187	0.00734538	0.0122941	0.0381754	0.00553286	0	0		0.0467286	0	0	0.00086621	0.0625455	0.00783948	0	0	0.0389439	0.0053673			0.022555	0.00302042	0.0110103	0.0529254	0.0199882	0.0231156	7.43122e-05	0.0032122	0
1	0.00912589	0.00225342	0.000194123	0.00357439	0	0.019882	0.0253927	0.0255421					0.0174249	0.00796118	0.0344608	0.00110234	0.00240269	0.021607	0.00418923	0.00131544	0.0848642	0.0253206	0.0161079		0.00260987	0.033712	0	0.000533052	0.0797223	0.0170204	0.0211054	0.00208013	0.0029374	0.0600182			0.0885054	0.000297788	0.00260672	0	0.00763195	0	0	0.0130421	0.00560017
2	0.0059466	0.0413266	0.0016141	0.00606144	0.00170946	0	0	0.00438815					0.0233774	0.0490754	0.0310785	0.0177635	0.122758	0.0117248	0.0148793	0.0509083	0.0339079	8.95248e-05	0.0011433		0.0381145	0.0259857	0.040711	0.00266526	0.00908793	0.072019	0	0.0386471	0.0536868	0.00133179			0.0088367	0	0.0214835	0.0237248	0.060973	0.000237942	0.0521548	0.0236736	0.0155329
3	0.0891542	0.024097	0.0541712	0.103135	0.0563675	0.00224395	0.00444595	0.0498284					0.117961	0.135617	0.06304	0.0173687	0.141782	0.0640986	0.0568754	0.0314639	0.0781708	0.0293268	0.00784145		0.0716748	0.0227483	0.0705926	0.0100947	0.0877668	5.24029e-05	0.0260941	0.0186621	0	0.0356227			0.0620351	0.0260777	0.110908	0.0861043	0.0393919	0.0314436	0.00283625	0.0190003	0.0591665
4	0.16689	0.181422	0.124124	0.0943279	0.120422	0.156342	0.0752522	0.208906					0.157726	0.149779	0.211304	0.206718	0.182616	0.158503	0.0629234	0.126597	0.213978	0.0230377	0.145761		0.0108038	0.0939493	0.129512	0.193176	0.111005	0.0953278	0.00440581	0.00102777	0.220086	0.206212			0.0874446	0.194378	0.130507	0.0494692	0.050855	0.0313995	0.123333	0.0556478	0.198342
5	0.125555	0.133074	0.154464	0.169733	0.0427198	0.124127	0.120026	0.221444					0.20128	0.118463	0.21522	0.164758	0.12743	0.193119	0.213887	0.162331	0.205094	0.059534	0.137435		0.165745	0.0909357	0.157803	0.182382	0.138108	0.125998	0.179547	0.0763156	0.245718	0.177548			0.072495	0.313401	0.198648	0.17818	0.123891	0.147929	0.0938439	0.10847	0.257482
day 28
	XX	XX	XX	XX	XX	XX	XX	XX	XX	XX	XX	XX	XXSRY	XXSRY	XXSRY	XXSRY	XXSRY	XXSRY	XXSRY	XXSRY	XXSRY	XXSRY	XXSRY	XXSRY	XY-	XY-	XY-	XY-	XY-	XY-	XY-	XY-	XY-	XY-	XY-	XY-	XY-SRY	XY-SRY	XY-SRY	XY-SRY	XY-SRY	XY-SRY	XY-SRY	XY-SRY	XY-SRY	XY-SRY	XY-SRY	XY-SRY
6	0.0623427	0.031991	0.0447773	0.0926968	0.0935744	0.0375495	0.099575	0.129836	0.0189617				0.0377441	0.0720339	0.0295803	0.0324084	0.0484	0.0285259	0.0398189	0.0297706	0.170348	0.101956			0.0306991	0.063076	0.0224225	0.046784	0.0623381	0.0410594	0.105837	0.14102	0.0342382				0.082328	0.052928	0.0124251	0.0518889	0.170645	0.0345257	0.0631851	0.157549	0.0976942	0.0286829
7	0.0633309	0.0825137	0.0504746	0.0963879	0.087642	0.0676971	0.0740285	0.114697	0.113292				0.0696351	0.0359404	0.082454	0.0536875	0.077226	0.066326	0.100936	0.0850807	0.0915638	0.0710276			0.0576241	0.0925945	0.0679408	0.065059	0.0707321	0.0446705	0.0973707	0.0537976	0.0418888				0.0792212	0.0638259	0.0900724	0.0644426	0.10541	0.0678546	0.0472503	0.108402	0.0925641	0.107689
8	0.103552	0.114775	0.125684	0.119348	0.169095	0.107267	0.00763674	0.0642489	0.0764149				0.0456472	0.0992444	0.131129	0.0405909	0.063773	0.0300133	0.129022	0.0391919	0.0288143	0.0851912			0.00999256	0.0546029	0.0874966	0.0953616	0.0805972	0.0143252	0.0491217	0.0107414	0.0902144				0.0436091	0.0509076	0.0332757	0.0648689	0.0771711	0.0500572	0.0993462	0.0121239	0.0248171	0.136451
9	0.021211	0.00454209	0.0279203	0.0341873	0.00264027	0.0264347	0.000495892	0.0438781	0.00863435				0.00671203	0.10937	0.055898	0.000187797	0.00546281	0.00767616	0.0608908	0.000360211	0.0437193	0.0145858			0.000822776	0.00824536	0.00423789	0.0209716	0.00869455	0.0021865	0.0693148	0.0170745	0.0123293				0.00622706	0.0279566	0.00298516	0.00344732	0.00354716	0.00235393	0.0749492	0.00279068	0.00177794	0.0150838
10	0.00624068	0.0018463	0.00121655	0.0015325	0.00320681	0.00106675	0.0112981	0.0036817	0.000489091				0.00184183	0.000972362	0.00420305	0.00123857	0.0105222	0.00423756	0.000130611	0.00418047	0.0187253	0.016049			0.00178864	0.00724065	0.00305667	0.0216689	0.00351684	0.00790712	0.0533896	0.0436752	0.000943457				0.00362481	0.00155275	0.00027326	0.000871096	0.00409022	0.000475185	0.00145513	0.0043488	0.00589869	0.00597413
11	0.00289158	0.000618706	0	0.0180219	0.00777117	0.00171368	0.0221333	0.0132997	0.00123401				0.00536608	0.00025366	0.00172184	0.00122068	0.00409943	0.00584778	0.0126039	0.00321653	0.0158107	0.00276672			0.00173498	0.00229075	0.0106862	0.00791623	0.00314248	0.0130693	0.00221859	0.00701249	0.0051391				0.00100944	6.38117e-05	0.0013456	0.00358323	0.00616999	0.0124648	0.00570045	0.00320153	0.0208167	0.00725289
12	0.00539883	0.009148	0.00178868	0.001148	0.0451305	0.0512934	0.077508	0.00112978	0.00229497				0.0391255	0.00213497	0.00375273	0.0103601	0.00718327	0.0218608	0.0258697	0.0103345	0.19779	0.0181769			0.00659413	0.0187413	0.0167443	0.0317859	0.0951234	0.088641	0.00402473	0.109165	0.0323191				0.00247116	0.00516875	0.0190537	0.0161122	0.0265286	0.0495512	0.0750092	0.0807281	0.128651	0.000273171
13	0.0214947	0.0735818	0.0523054	0.0132157	0.0619021	0.0153749	0.085558	0	0.0142025				0.0285262	0.0250119	0.0299423	0.0620579	0.0547719	0.056846	0.0368149	0.0327081	0.132602	0.0390947			0.085831	0.0448438	0.0834868	0.0465301	0.109908	0.0918104	0.0974923	0.125938	0.0531138				0.0460016	0.0465684	0.0198859	0.0736601	0.0968018	0.0804998	0.0634425	0.0117441	0.0195574	0.0416724
14	0.0675311	0.000397739	0.0783347	0.0466725	0.00861562	0.0563828	0.0302081	0	0.0387699				0.0595494	0.0477462	0.0747102	0.0920339	0.12954	0.0519048	0.00247725	0.0294865	0.0214067	0.0585029			0.10336	0.0622254	0.00039374	0.0609154	0.00236213	0.0653664	0.0757535	0.0319525	0.13078				0.151953	0.0605431	0.0302988	0.00221172	0.000439063	0.0290171	0.00451119	0.0737902	0.00111121	0.0789226
15	0.0836452	0.0200687	0.0279083	0.00522916	0.00514158	0.000220232	0.0425393	0	0.0123665				0.00436548	0.00804312	0.010565	0.0133559	0.0265442	0.0616951	0.0149332	0.0406835	0.00356032	0.00360652			0.0324639	0.0667868	0.0154802	0.0221203	0.0217074	0.0427149	0.001042	0.00470267	0.0344861				0.022365	0.0443349	0.00260011	0.000994656	0.0484818	0.0204506	0.0368557	4.65113e-05	0.0188629	9.5016e-05
16	0.00375173	0.0541024	0.0111537	0.00115349	0.0751569	0.0404504	0.0153644	0	0				0.039068	0.0210168	0.00129359	0.00595584	0.008018	0.026968	0.000875093	0.00568219	0.0441587	0.0569367			0.00924133	0	0.000618241	0.0354538	0.000949072	0.0735291	6.51251e-05	0.0889657	0.0190591				0.000393288	0.0255176	0.0278187	0.0169092	0.00478347	0.00504224	0.000371644	0.00199999	0.0440041	0.0474407
17	0.0229267	0	0	0.00712968	0.0501652	0.00327251	0.00133891	0	0.000884127				0	0.0218993	0.043099	0.0251469	0.0275598	0.0516589	0.0266925	0.0333322	0.00127346	0.0223965			0.0458131	0.0397265	0.00332607	0.00182589	0.0742543	0.018584	0.0415368	0.0260043	0.00611798				0.0333902	0.0166336	0.00169753	0	0.0433286	0.0590505	0.0448403	0.00129456	0	0.000878898
18	0.00908193	0.0435844	0.0609899	0.0448873	0	2.06467e-05	0.108757	0	0.0512154				0.048556	0.0347619	0.0200969	0.0256253	0.00124281	0.00223709	0.00351778	0.0150578	0.00199091	0.00678026			0.0167238	0.0225123	0.0343556	0.0258164	0	0.0998168	0.058122	0.0404369	0.0614117				0.000235973	0.00960721	0.0188301	0.00758657	0	0	0.00473132	0.0244882	0.0671544	0.0477654
19	0.122718	0	0	0	0.00473539	0.06949	0.00131412	0.0176256	0				0.00096076	0	0.000613681	0.0206264	0.0202467	0.0675582	0.0157996	0.0132568	0.0736098	0.0546594			0.115415	0.0522586	0	0.00416771	0.00378574	0.0367609	0.0001563	0.0502876	0.0423396				0.0203592	0.0193066	0	0.0488555	0.0369275	0	0.00342199	0	0	7.1262e-05
20	0.00324387	0	0	0.000126335	0	0.00237437	0	0.0637583	0				0.000239083	0.0261851	0.0266532	0	0	0.00182839	0.022661	0.0367618	0.0157927	0.00301402			0	0	0	0.0880538	0.117991	0	0.00537499	0.00133607	0.0159776				4.58836e-05	0	0.0352506	0	0	0.0727561	0.0535368	0.0631391	0.0774794	0.000308802
21	0.00345434	0	0	0	0	0.0010461	0	0.0485211	0.0495337				0.046546	0	0.0559333	0.00566073	0.0405352	0.100574	0	0.0377359	0	0.019908			0	0	0	0.0115318	0	0.04509	0.0802254	0.0915171	0.0234576				0.0229418	0	5.3824e-05	0	0.0309308	0.0164555	0.0212951	0.0422708	5.55607e-05	0.0238134
22	0	0.0781141	0	0	0.155893	0	0	0.0773999	0.0384163				0	0	0	0.000312995	0.0667177	0.0418071	0.00183726	3.04403e-05	0.04267	0.0614603			0	0	0	0.00793639	0	0.0231977	0	0	0.00011592				0	0.0379113	0	0	0.000392846	2.63992e-05	0.00240997	0.0368835	0	0.0254603
23	0	0.0118831	0.0739864	0	0.0260607	0.023527	0.107584	0.0110154	0.0428632				0	0	0.00481232	0.000983698	0.00577815	0.0164402	0.0368236	0	0.000260073	0.131112			0.0909584	0.00209651	0	0.00756153	3.16357e-05	0.00179437	0	0	0				3.93288e-05	0	0	0.00449757	0.000288857	0.0240363	0.0175902	0.00394571	0.0205482	0.00354331
24	0.023732	0.000294622	0	0.0372907	0.00416885	0.0530277	0.0531597	0.0176949	0.0120881				0.0249045	0.00115732	0.00121853	0.00375146	0.00411798	0.00586621	0.0321956	0.0383701	0	0.0540514			0.00135341	0.101342	0.000113977	0.0882268	0.0264738	0.0363787	0.00766305	0.0679886	0.00612764				0.00926849	0.00302042	0.0199191	0.00115528	0.017343	0.0101813	0.0321672	0.110309	0.000675988	0.00193595
1	0.0061263	0.00899087	0.00043362	0.00326273	0.00871183	0.000378523	0.0013637	0.0663746	0.00135064				0.0304831	0.00273213	0.0328651	0.000567862	0.0114125	0.014243	7.83665e-05	0.0126632	0.00860933	0.00042763			0.00243255	0.00638329	0.00663141	0.138312	0	0.0514758	0	0.00217395	0.0355713				0.0742856	0.000297788	0.0814394	0.00808081	0.0012132	0.0159803	0.00600063	0.000147286	0.0190295	0.0136071
2	0.00809367	0.0690594	0.00112019	0.00421299	0	0.0101616	0.00460353	0.0423817	0.0100301				0.0800751	0.00746711	0.00407502	0.0139506	0.00100631	0.0267621	0.0326614	0.0207704	0.00594582	0.0234166			0.027253	0.00063632	0.0757397	0.00814598	0.00344302	0	0.0066471	0	0.00124614				0.0303094	0	0.0180186	0.0464585	0	0.0592793	0.00724992	0.00462012	0.0167608	0.000558219
3	0.0532288	0.143692	0.0024632	0.000873358	0.0259645	0.0256329	0.0656148	0.00438533	0.0864413				0.131172	0.0561064	0.0439378	0.123186	0.0587229	0.0494372	0.0119378	0.190237	0.000161425	0.0361631			0.0281592	0.00978593	0.0779261	0.0118058	0.0472743	0	0.0184434	0.0308202	0.0522444				0.0631227	0.0260777	0.10557	0.0463596	0	0.00982049	0.109767	0.0162092	0.00116678	0.0454731
4	0.144776	0.0263392	0.204891	0.21835	0.0928906	0.214323	0.040969	0.115139	0.221487				0.150317	0.149865	0.132387	0.211338	0.138207	0.119205	0.215151	0.152232	0.0105554	0.0302484			0.100516	0.147841	0.269422	0.0605286	0.106354	0.0804264	0.108537	0.0553375	0.133356				0.12833	0.194378	0.249164	0.295098	0.0909091	0.196832	0.129272	0.107992	0.183387	0.13153
5	0.161228	0.224457	0.234552	0.254273	0.0715332	0.191295	0.14895	0.164933	0.19903				0.149166	0.278058	0.209058	0.255752	0.188912	0.140482	0.176272	0.168857	0.0706324	0.088468			0.231224	0.19677	0.219921	0.0915204	0.161321	0.121195	0.117664	5.2839e-05	0.167523				0.178468	0.313401	0.230023	0.242919	0.234598	0.183289	0.0956412	0.131976	0.157987	0.235517
body weight
	XX	XX	XX	XX	XX	XX	XX	XX	XX	XX	XX	XX	XXSRY	XXSRY	XXSRY	XXSRY	XXSRY	XXSRY	XXSRY	XXSRY	XXSRY	XXSRY	XXSRY	XXSRY	XY-	XY-	XY-	XY-	XY-	XY-	XY-	XY-	XY-	XY-	XY-	XY-	XY-SRY	XY-SRY	XY-SRY	XY-SRY	XY-SRY	XY-SRY	XY-SRY	XY-SRY	XY-SRY	XY-SRY	XY-SRY	XY-SRY
-7	21.3	24	21.3	20.9	22.6	18.6	21.7	21.6	24.2				31.7	26.9	25.3	23.7	29.7	30	29	27.5	29	27.6	24.8	25.4	20.5	21.9	21.3	20.2	20	21	25.2	20.1	21.9	21.3	22.6		26.5	26	26.4	30.3	27.3	29.9	24	26	29.2	24.8	29.5
0	20.1	23.6	21.4	22.2	21.2	18.9	22.3	20.8	23.8				30	26.2	24.7	28.8	27.7	29	27.8	28.1	27.4	27	23.8	24.9	19.4	21.4	20.4	20.1	20.4	20.6	25.4	20.2	22.5	21.5	22.4		26.6	25.4	26	30.2	27.3	29	24.8	26.8	29	24.7	30.5
7	17.6	21.1	17.4	18.7	19.4	16.8	18.4	19	21.7				26.9	22.5	22.1	24.4	24	26.3	24.1	23.2	24.1	22.6	20.6	23.7	17	19.8	17.9	16.3	16.2	18.6	22.2	18.6	20.1	20.2	20.7		21.2	21.3	20.5	24.7	22.4	24	20.4	22.9	26.8	23.1	26.3
14	17	19.9	16.5	17.5	18.8	16.4	18.2	18.4	20.8				24.1	20.7	19.6	21.9	21.5	23.1	22	21.3	21.8	21.9	19.5	23.2	16.5	18.3	17	15.8	14.7	17.5	20.8	18	19.2	20	20.1		19.2	19.5	19.2	22.3	20.5	22.2	19	21.4	25.6	22.2	25.6
21	16.9	19.1	16.5	17.5	18.5	16.3	17.6	18.5	20.7				22.4	20.2	18.9	20.8	20.8	22.1	20.7	20.9	20.8	21.3	19.2	22.9	16.5	17.8	16.8	16.2	15.1	17.4	20.3	17.2	18.7	19.8	19.7		19	19.6	19	21.4	20	21.6	18.5	20.8	24.7	21.5	24.5
28	17.5	19.1	16.6	17.5	18.9	16.4	17.4	18.6	20.5				21.4	20	19	20.2	20.5	21.9	21.1	20.5	20.5	20.6	19	22.4	16.8	17.7	17	17.6	15.7	17.8	19.6	17.3	18	19.6	19.4		19.2	19.5	19	21.4	20	20.8	18.2	20.4	24.3	22	24.1
normalized body weight
	XX	XX	XX	XX	XX	XX	XX	XX	XX	XX	XX	XX	XXSRY	XXSRY	XXSRY	XXSRY	XXSRY	XXSRY	XXSRY	XXSRY	XXSRY	XXSRY	XXSRY	XXSRY	XY-	XY-	XY-	XY-	XY-	XY-	XY-	XY-	XY-	XY-	XY-	XY-	XY-SRY	XY-SRY	XY-SRY	XY-SRY	XY-SRY	XY-SRY	XY-SRY	XY-SRY	XY-SRY	XY-SRY	XY-SRY	XY-SRY
0	1	1	1	1	1	1	1	1	1				1	1	1	1	1	1	1	1	1	1	1	1	1	1	1	1	1	1	1	1	1	1	1		1	1	1	1	1	1	1	1	1	1	1
7	0.875622	0.894068	0.813084	0.842342	0.915094	0.888889	0.825112	0.913462	0.911765				0.896667	0.858779	0.894737	0.847222	0.866426	0.906896	0.866907	0.825623	0.879562	0.837037	0.865546	0.951807	0.876289	0.925234	0.877451	0.810945	0.794118	0.902913	0.874016	0.920792	0.893333	0.939535	0.924107		0.796992	0.838583	0.788462	0.817881	0.820513	0.827586	0.822581	0.854478	0.924138	0.935223	0.862295
14	0.845771	0.84322	0.771028	0.788288	0.886792	0.867725	0.816144	0.884615	0.87395				0.803333	0.790076	0.793522	0.760417	0.776173	0.796552	0.791367	0.758007	0.79562	0.811111	0.819328	0.931727	0.850515	0.85514	0.833333	0.78607	0.720588	0.849514	0.818898	0.891089	0.853333	0.930233	0.897321		0.721804	0.767717	0.738462	0.738411	0.750916	0.765517	0.766129	0.798508	0.882759	0.898785	0.839344
21	0.840796	0.809322	0.771028	0.788288	0.872641	0.862434	0.789238	0.889423	0.869748				0.746667	0.770992	0.765182	0.722222	0.750903	0.762069	0.744604	0.743772	0.759124	0.788889	0.806723	0.919679	0.850515	0.831776	0.823529	0.80597	0.740196	0.84466	0.799213	0.851485	0.831111	0.92093	0.879464		0.714286	0.771653	0.730769	0.708609	0.732601	0.744828	0.745968	0.776119	0.851724	0.870445	0.803279
28	0.870647	0.809322	0.775701	0.788288	0.891509	0.867725	0.780269	0.894231	0.861344				0.713333	0.763359	0.769231	0.701389	0.740072	0.755172	0.758993	0.729537	0.748175	0.762963	0.798319	0.899598	0.865979	0.827103	0.833333	0.875622	0.769608	0.864078	0.771653	0.856436	0.8	0.911628	0.866071		0.721804	0.767717	0.730769	0.708609	0.732601	0.717241	0.733871	0.761194	0.837931	0.890688	0.790164
[truncated: 1 more columns]

## Sheet: Fig 4 estrogen exposed
weights in grams
	ESR WT (control)	ESR WT (control)	ESR WT (control)	ESR WT (control)	ESR WT (control)	ESR WT (control)	ESR WT (control)	ESR WT (control)	ESR KO (injected)	ESR KO (injected)	ESR KO (injected)	ESR KO (injected)	ESR KO (injected)	ESR KO (injected)	ESR KO (injected)	ESR KO (injected)
-7	21.5	18.5	22	20.1					25.6	20.8	20.6	23.3	21	22	21.6
0	20.8	17.3	20.8	20					23.2	19.8	19.7	21.5	19.8	23.3	22.7
7	19.4	16	19	17.6					20.6	17.8	17.7	18.8	17.6	19.4	18.8
14	18.3	15.5	18	17.2					18	16.9	16.9	17.6	16.5	17.7	17.9
21	18.3	15.8	17.3	17.3					18.2	16.5	17.4	17	16.5	17.2	17.7
28	18.4	15.6	17.3	17.3					18	16.4	17.1	17.2	16.5	16.9	17.5
normalized weights
	ESR WT (control)	ESR WT (control)	ESR WT (control)	ESR WT (control)	ESR WT (control)	ESR WT (control)	ESR WT (control)	ESR WT (control)	ESR KO (injected)	ESR KO (injected)	ESR KO (injected)	ESR KO (injected)	ESR KO (injected)	ESR KO (injected)	ESR KO (injected)	ESR KO (injected)
0	1	1	1	1					1	1	1	1	1	1	1
7	0.933	0.925	0.913	0.88					0.888	0.899	0.898	0.874	0.889	0.833	0.828
14	0.88	0.896	0.865	0.86					0.776	0.853	0.858	0.819	0.833	0.76	0.789
21	0.88	0.913	0.832	0.865					0.784	0.833	0.833	0.791	0.833	0.738	0.78
28	0.885	0.902	0.832	0.865					0.776	0.828	0.868	0.8	0.833	0.725	0.771
3 hours before mealtime high activity data in seconds
	ESR WT (control)	ESR WT (control)	ESR WT (control)	ESR WT (control)	ESR WT (control)	ESR WT (control)	ESR WT (control)	ESR WT (control)	ESR KO (injected)	ESR KO (injected)	ESR KO (injected)	ESR KO (injected)	ESR KO (injected)	ESR KO (injected)	ESR KO (injected)	ESR KO (injected)
0	340.14	235.167	828.794	957.867					496.562	40.7667	155.822	374.4	397.1	369.867	207.767	1.2303
14	480.033	3657.23	1799.47	3502.4					1772.1	1740.47	1049.57	3401.27	2328.07	3351.13	3003.27	1.73939
28	620.834	2247.97	2868.53	3249.13					802	1340.4	1273.47	2959.03	2418.27	4856.93	1211.9	2.10303
3 hours before mealtime normalized high activity data
	ESR WT (control)	ESR WT (control)	ESR WT (control)	ESR WT (control)	ESR WT (control)	ESR WT (control)	ESR WT (control)	ESR WT (control)	ESR KO (injected)	ESR KO (injected)	ESR KO (injected)	ESR KO (injected)	ESR KO (injected)	ESR KO (injected)	ESR KO (injected)	ESR KO (injected)
0	0.0743258	0.0166465	0.0632396	0.121501					0.0739144	0.00748534	0.0185451	0.0465165	0.0400398	0.0548976	0.0381349	0.0942433
14	0.0773657	0.384535	0.283479	0.331908					0.241218	0.290985	0.228354	0.345098	0.314397	0.430041	0.339813	0.136019
28	0.0863829	0.233519	0.269377	0.31183					0.149954	0.225831	0.260846	0.434762	0.300446	0.591686	0.176882	0.225471

## Sheet: Fig 5 aged
	male	male	male	male	male	male	male	male	female	female	female	female	female	female
-7	34.4	31.9	33.4	38.3					27.7	31.8	29.4
0	33.9	34.9	34.7	34.4	33.4	31.5	32.4	36.6	25.3	25.5	20.8	28	31.5	29.1
7	28.6	25.8	25.3	31					23.1	22.6	19.7	25.6	24.9	24
14	30			28.1	25.3	23.4	22.6	28.4	21.3	20.8	18.9
21	23	31.6	27.2	21.8	23.4	22.2	21.5	25.8	20.5	20.3	19.2
28	23.9	31.3	26.8	22.5	21.8	21.6	21.4	24.1	20.2		18.9
35	20.8	26	23.1	20.2	21.2	22	21.1	22.5	19.1	18.6	18	19.7	20.9	19.7
activity 3 hours premeal (seconds)
	Aged Males	Aged Males	Aged Males	Aged Males	Aged Males	Aged Males	Aged Males	Aged Males	Aged Females	Aged Females	Aged Females	Aged Females	Aged Females	Aged Females	Aged Females	Aged Females
-7	308.508	622.255	512.011	407.474					422.833	404.267	406.134	525.533	577.433	151.4
0	605.867	357.467	688.4		445.034	424.3	487.3	226.167	485.833	220	1303.23	284.567	148.067	161.333
7	832.9	1407.1	3971.13	300.367	261.6	197.533	1146.7	882.4	560.167	73.5333	1131.07	287.167	645.533	1095.67
14	1180.37	1267.83	3141.7	327.267	234.767	290.833	88.4333	474.367	2094.03	1304.43	1053.1	2394.03	1574.2	4422.93
21	4681.13	3269.3	4786.96	2258.03	3504.1	105.433	3098.49	44.3	3262.93	1181.83	2662.37	1550.53	1385.6	1921
28	3801.86	1999.97	4186.16	1485.77	2010.7	963	2385.73	2414.77	2541.33	1179	2457.57	1693.3	889.534	2018.53
35	2689.2	2813.87	3471.57	2040.5	3865.27	3750.86	4064.23	2734.6	3549.9	1413.67	2831	3203.83	2075.33	3869.57
day -7
1	912.011	1184.38	1336.23	1260.63					659.733	620.067	1653.66	1461.16	1949.73	1513.73
2	595.895	726.526	563.762	895.796					459.267	272.933	1038.53	849.398	1335	1184.23
3	154.788	207.974	49.683	939.873					92.1	99.8	409.6	309.133	794.6	556.4
4	35.6022	44.0106	76.8768	152.619					51.9333	167.333	100.333	503.067	290.433	266.667
5	7.14047	46.0126	405.338	271.137					92.5667	88.3	450.7	276.9	990.5	298.733
6	72.0052	133.133	36.6366	43.9439					339.267	377	1314.6	875.933	972.767	627.434
7	236.636	317.684	170.837	473.239					124.8	121.633	1504.57	881.6	898.2	1163.87
8	185.685	436.135	98.5317	579.145					229.367	206.5	1306.47	1285.46	271.333	1196.07
9	286.019	530.63	832.431	289.99					187.4	292.6	1421.03	966.132	61.8333	1018
10	443.143	241.174	781.013	336.67					157.6	157.5	1782.23	594.433	233.633	354.133
11	369.936	126.426	405.672	473.206					66.0333	30.8	1259.37	90.0333	92	63.3667
12	228.261	663.763	58.5919	137.27					156	137.633	793.933	136.133	128.833	156.133
13	216.583	125.492	55.6222	486.92					243.633	257.633	82.6333	401.667	183.067	120.133
14	556.489	129.463	25.392	28.662					167	193	261.633	387.267	215.533	767.8
15	455.788	49.3827	21.5549	345.278					397.467	437.467	872.766	338.434	727.167	371.833
16	114.715	230.063	220.353	353.987					324.033	383.7	188.967	683.932	274.167	705.066
17	32.3657	53.7203	158.725	884.384					236.233	151.167	228.233	0	735.733	698.967
18	316.516	575.675	746.411	1048.21					174.867	21.3333	87.2667	110.367	40.8333	126.9
19	409.542	257.457	859.121	92.8928					237.833	135.267	581.1	0.4	139.5	114.1
20	372.772	165.599	542.173	152.886					287.567	118.867	669.267	162.267	327.2	366.467
21	0	35.9025	521.587	24.2576					265.567	129.733	27.6	35.6333	180.533	83.1333
22	25.6256	130.964	0	183.583					203.867	184.2	46.6333	196.9	79.4333	36.3333
23	106.54	458.024	507.974	184.718					62	213.7	86.3667	322.033	4.56667	28.4667
24	176.343	33.2666	4.03737	39.1725					156.967	6.36667	273.133	6.6	493.433	86.6
day 0
1	1486.93	1867.86	1595.3	1407.13	1094.53	1128.67	1078.13	1317.26	1499.87	963.733	1591.9	1880.3	1703	1291.27
2	699.632	1099.46	1292.6	623.099	606.933	507.633	903.033	1296.33	1018.03	580.2	1109.13	1263.5	1097.4	1301.43
3	154	356.167	1062.03	364.734	130.833	27.6	287.933	1065	141.267	13.4	930.8	152.933	579.6	389.634
4	419.167	402.834	522.233	170.567	185.533	41.9	107.267	685.5	760.7	557.233	52.1333	1325.83	701.734	632.1
5	51.7667	258.067	5.53333	205.3	626.033	130.4	306.467	201.6	185.633	118.9	403.1	481.033	990.466	1111.63
6	123.167	85.7667	199.267	170.233	490.167	256.9	331.034	410.967	1277	1381.3	1402.67	976.3	727.9	812.967
7	188.633	83.3333	49.9333	32.7667	705.833	478.9	255.7	965.466	1222.7	1366.9	1533.63	1723.56	1280.87	890.933
8	80.0333	131.433	271.267	91.4667	679.633	237.367	76.8333	880.566	1083	1384.4	1263.23	1400.86	1446.17	932.499
9	349.467	751.533	196.467	94.5	538.267	125.867	265.567	928.302	294.8	693.833	1586.76	1611.83	910.033	770.233
10	417.7	659.666	628.767	316.7	53.2333	371.367	471.034	812.401	71.2333	47.2	1189.53	233.067	14.6333	134.167
11	688.933	262.3	1280.46	270.6	198.833	357.2	475.1	638.801	294.333	169.633	613.233	131.767	36.2333	220.167
12	1153.5	867.533	1217.43	357.933	112.033	113.433	240	8.53333	1241.7	342.833	128.733	1634.56	627.734	220.133
13	980.1	1153.7	731.367	241.433	329.933	30.9	209.8	34.9667	1244.97	51.1	31.2667	1462.26	567.167	816.8
14	238.767	295.067	72.1333		39.9	43.1333	4.83333	127.4	79.3667	416.433	1501.27	78.2667	0.9	949.299
15	37.7333	4.76667	403		678.733	432.933	386.5	375.567	213.267	480.267	1282.43	503.967	247.633	67.4
16	858.267	948.733	190.367		238.367	187.667	652.4	367.067	113.467	239.133	472.067	185.5	95.9667	452.467
17	1301.7	123.333	399.2		678.133	620.667	211.433	427.166	93.3667	7	39.3	49.0333	15	579
18	363.033	0.7	551.8		22.9333	232.467	131.533	584.001	155.967	130.167	1426.77	60.1	523.267	27.3667
19	9.8	325.533	310.3		324.9	4.3	539.7	17.9667	604.9	335.767	1115.93	78.2333	23.3667	3.76667
20	742.667	12.2667	135.733		218.1	306.333	0.333333	49.3333	653.367	0	557.433	62.8333	0.8	962.2
21	29.7	297	319.767		2.93333	5.16667	31.4	344.766	1.63333	255	0.2	940.632	695.433	340.1
22	172	131.667	492.634		240.3	11.7333	93.8	0	157.467	77	7.1	21.1333	78.4667	0.7
23	362.667	186.967	195.767		9.5	387.333	393.5	226.167	250.767	0	856.7	64.3333	67.7333	67.9333
24	71.2	38.8333	0		195.233	25.2333	0	0	77.6	143	439.433	199.1	1.86667	92.7
day 7
1	1018.77	301.167	418.1	988.198	640.934	845.9	788.666	1762.06	694.866	342.7	868.167	1065.93	747.333	656.133
2	646.567	416.667	823.2	398.6	1.6	9.86667	14.2667	1369.13	668.6	277.167	556.333	519.733	1012.57	421.733
3	377.7	79.5667	234.2	379.767	195.533	38.6667	289.733	1093	134.4	83.9667	263.433	57.7333	534.433	408.267
4	90.8667	102.967	51.1667	190.233	241.833	64.3667	127.9	53.6333	38.5	33.7333	49.5	331.2	2	541.133
5	75.3333	13.2	61.7333	18.5333	65.3	129.933	121.333	104.167	199.433	112.667	298.567	283.5	189.367	589.167
6	181.533	44.7	186.567	31.1667	194.4	23.8	81.4667	119.6	217.1	156.1	210.867	316.467	119.567	233.433
7	419.633	276.4	427.767	122.7	121.567	129.533	176.633	267.433	600.2	381.6	498.067	562.266	589.133	112.833
8	912.3	464.734	800.534	519.633	266.2	36.3	46.4333	168.367	196.033	366.833	446.067	418.167	950.001	389.067
9	948.166	438.167	1329.4	311.967	143.167	256.833	159.5	1104.9	181.967	196.767	289.333	28.3333	529.367	919.433
10	264.8	212.033	688.5	74.5333	161.967	27.4667	601.733	511.433	744.733	217.433	25.4	400.667	633.934	463.167
11	292.033	93.2667	0	69.5	141.333	196.133	338.567	64.4667	72.0333	3.13333	340.333	282.6	534.733	77
12	631.534	3.36667	367.467	8.53333	165.267	405.6	4.23333	50.9	84.8666	480.9	416.333	4.7	51.2667	308.933
13	612.733	366.667	585.833	183.233	166.533	65.9	176.4	109.767	821.934	51.5667	377.033	203.533	523.633	804.467
14	269.667	0.3	0.2	408.433	162.533	55.3333	165.467	72.7667	36.5667	1.2	8.73333	248.6	98.6667	834.767
15	659.567	14.3	356.633	32.1	239.367	369.333	203.333	317.5	133.533	0	0	1.43333	0	289.5
16	34.4	105.3	260.967	142.733	317.3	124.833	96.0667	230.1	475.567	0	1.13333	0	9.06667	0
17	84.7667	63.9667	3.7	1.16667	103.5	167.1	97.4667	516.034	0	0.4	5.76667	24.2667	0	6.6
18	376.167	3.43333	196.433	17.4333	40	109.733	8.53333	666.633	6.6	128.7	504.467	429.8	303.667	7.26667
19	137.133	399.866	17.5333	192.367	366.467	147.667	91.3	33.6333	582.333	287.9	524.733	403.3	539.067	6.4
20	258.133	401.433	106.067	0	19.1333	146.467	217.133	79.6333	3.46667	34.5	53.7	25.0667	706.767	172.767
21	332.7	19.4	1024.13	12.6	9.56667	35.5667	49.2667	38.7667	404.4	138.967	37.0667	1.3	273.233	8.3
22	200.733	430.567	1466.2	236.467	120.9	178.733	270.367	218.9	0.466667	10.1	478.8	212.067	381.3	382.6
23	440.4	342.7	1354.5	0	118.5	0.233333	876.334	595.966	462.733	41.4667	615.5	0	7.36667	74.7667
24	191.767	633.834	1150.43	63.9	22.2	18.5667	0	67.5333	96.9666	21.9667	36.7667	75.1	256.867	638.3
day 14
1	427.233	326.433	421.834	751.399	1009.63	1049.33	1485.19	1562.73	256.133	377.032	456.433	538.4	714.833	360.5
2	578.9	486.233	775.233	434.633	484	302.433	978.097	1369.63	383.6	269.8	315.033	380.9	637.233	453.133
3	560.067	78.8667	14.1333	412.867	19.4333	338.2	70.1667	1165.67	697.633	360.467	410.367	549.4	752.733	67.3
4	37.1667	31.4667	34.4333	58.9	560.333	56.2667	283.034	1104.93	284.167	27	265.067	156.767	15.1333	17.3667
5	29.3	14.8667	111.5	5.63333	610.567	385.9	272.333	136.5	43.1	11.2333	74.4	196.533	69.1	324.6
6	64.6667	33.0333	138.167	45.4667	369	64.5	288.834	57.1333	150.333	99.8	150.067	555.633	63.8	446.333
7	56.2667	93	129.933	87.6667	257.4	137.967	75.4667	568.167	239.5	294.667	244.067	571.733	614.267	378.333
8	85.6667	193	217.467	59.9333	294.2	154.3	767.033	813.6	324.6	572.933	665.933	1.43333	615.933	0
9	115.8	268.233	556.4	211	430.8	313	1358.9	914.1	43.3333	46.4333	209.767	24.6333	485.533	9.3
10	36.9667	48.9	436.067	42.2667	154.1	44.6	1556.49	959.033	151.5	294.267	114.333	14.7	21.0667	185.1
11	89.3	213.633	26.3333	47.0667	237	882.433	777.532	197.167	666.167	439.067	26.2333	219.233	200.467	23.1333
12	189.1	0.133333	16.1333	317.7	114.733	611.367	439.1	2.5	66.4667	107.667	220.2	0	130.033	537.633
13	69.5667	328.867	843.633	29.6667	934.8	108.3	34.2667	962.333	64.7667	270.133	365.2	0	409.933	94.7333
14	824.833	0	57.6	221.667	670.8	35.6	192.733	874.033	241.667	264.533	0	0	19.7667	0
15	329.133	129.833	0	489.4	2.36667	566.3	446.033	182.9	0	1.33333	11.4	0	40.0333	0.4
16	1.43333	0.666667	75.0333	5.73333	132	272.467	94.5	82.4	0	18	0	189.4	291.067	0.4
17	264.733	69.1667	499.067	11.2333	396.2	0	184.633	13.3	107.4	0.6	0.2	280.233	590.1	208.867
18	18.7333	0	23.7667	58.1333	0.7	38.0667	135.033	64.1333	747.633	127.067	450.533	31.3	38.6333	0.7
19	15.4667	65.0333	114.333	203.033	1.3	286.534	6.4	791.8	163.667	320.467	230.7	29.4667	45.5	25.5
20	234.1	34.5667	450.467	0	334	0	91.9333	11.5	393.933	56.4333	117.6	594.6	478.367	593
21	49.0667	128.067	464.833	91.8	4.03333	7.4	173.4	25.9667	542.267	0.4	20.2667	244.533	0.633333	650.733
22	276	71.6	512.667	182.667	100.867	222.2	7.93333	296.2	347.533	157.867	124.533	102.8	424.8	1030.33
23	331.167	485.967	1448.6	14.4667	133.9	33.9	10.1667	169.8	558.3	476.867	927.867	1006.47	967.9	1858
24	573.2	710.267	1180.43	130.133	0	34.7333	70.3333	8.36667	1188.2	669.7	0.7	1284.76	181.5	1534.6
day 21
1	333.1	335.733	155.033	567.465	350.867	19.6667	619.566	6.73333	203.133	257.3	798.9	503.7	458.267	238.334
2	663.633	550.367	759.5	473.666	931.267	36	666.166	5.93333	1045.93	386.333	536	503.366	447.233	251.967
3	515.333	203.833	61.7	336.833	314.533	25.2667	812.499	1.26667	548.1	163.6	1077.83	621.233	934.7	593.6
4	65.8	73	42.6	69.5333	70.1667	33.0333	240.433	4.46667	6.23333	4	1133.3	101.067	728.6	443.367
5	12.8	0.4	16.7333	16.6333	172.3	32.7667	23.8333	8.86667	85.1333	111.033	2.06667	24.7667	11.6333	46.0667
6	31.7667	45.5667	240.367	67.4	1151.97	13.4	727.367	26.8667	425.667	149.8	130.933	852.966	149.033	460.3
7	63.6	112.233	245.6	163.2	1037.6	20.2333	773.699	23.4667	743.833	440.9	739.967	171.3	190.367	1082.4
8	261.533	263.2	741.967	247.667	491.7	24.3667	487.9	13.7	12.1333	372.067	48.6667	4.7	56.4333	1043.37
9	66.0333	7.13333	190.933	323	114	20.0667	17.2667	1.46667	348.9	154.8	236.1	211.967	556.567	109.733
10	231.533	257.5	107	159.9	862.934	33.9	31.1333	1.86667	435.467	153.533	544.933	0.6	35.1667	24.7667
11	71.2667	77.2667	236.933	289.067	3.2	30.3	984.099	5.03333	8.4	32.3667	19.6333	319.134	256.733	17.4333
12	296.667	0.633333	0	318	165.1	35.7667	46.9333	1.36667	199.533	394.567	6.1	187.2	0	1.4
13	32.4	174.467	372.567	474.734	618.434	35.5	3.86667	6.63333	477.433	3.13333	600.933	0.2	13.7667	399.633
14	46.5	0	0	781.1	6.33333	35.1333	724.533	5.9	0	71.8333	0.433333	0	370.533	0
15	326.233	88.6333	26.4333	144.1	72.8667	8.1	314.267	2.56667	567.534	0.8	0.2	3	467.1	0
16	0	0	81.2667	289.167	0	8	0.966667	4.96667	308.967	0	0	497.067	0	0
17	109.367	6	167.367	335.833	162.7	3.06667	274.4	3.6	160.067	113.667	0	7.6	432.033	0
18	23.6333	0.4	70.9	744.967	249.167	18.8667	316.767	1.56667	227.3	205.567	513.2	22.0667	113.4	356.333
19	101.267	93.7	12.6333	43.1667	23.5667	9	458.567	8.16667	244.833	11.1333	571.867	6.1	11.0333	62.0667
20	150.567	84.4333	141.267	1.9	10.6	12.9	1.46667	4.8	35.5333	130.367	71.4667	224.133	130.2	10.0333
21	360.033	267.433	424.833	307.433	717.934	25.4333	334.933	4.9	489.367	3	13.4333	12.1667	190	171.033
22	1175.77	811.567	1004.83	878.4	9.83333	24.1667	766.1	18.7333	108.667	176.933	945.8	346.767	243.433	489.633
23	2029.9	1339.57	1964.5	1071.5	1666.97	36.8333	676.8	15.4667	1689.13	385.9	64	60.6667	472.033	566.033
24	1475.47	1118.17	1817.63	308.133	1827.3	44.4333	1655.6	10.1	1465.13	619	1652.57	1143.1	670.133	865.333
day 28
1	192.566	350.699	360.333	826.931	427.499	279.734	241.967	341.033	401	320.167	985.999	274.233	529.999	241.234
2	747.033	614.2	1007.13	524.633	487.467	241.067	142.333	386.867	713.733	293.733	655.267	527.866	306.3	525.9
3	342.1	747.367	619.333	913.233	27.8	80.3	49.2	506.967	1171.83	229.3	359.833	118.833	756.8	196.667
4	1	153.233	304.267	166.033	73.4667	31.6667	26.2667	52.0333	109.2	15.9333	451.667	74.6333	472.133	19.4333
5	22.1333	46.3333	118.567	84.3	30.7	7.3	6.5	85.0333	24.7	74.5667	1.33333	548.033	23.5	173.267
6	88.2333	347.633	38.3	93.7333	233.1	89.7333	17.7667	118.467	44.8	169.667	227.167	170.7	158.833	381.767
7	291.567	372.7	761.533	556.567	213.967	108.1	101.667	215.133	352.867	590.467	684.233	193.167	94.8	750.267
8	343.5	251.167	557.733	451.967	62.3333	228.833	140.133	347.333	5.4	19.7667	923.1	48.6	620.567	1381.43
9	308.8	0	82.5667	41.3333	233.9	5.5	0	49.8333	108.533	22.2	379.6	73.0333	0.233333	496.267
10	1.16667	2.46667	12.9	357.033	72.7667	74.9333	1	156.8	35.4333	443	0	223.667	73.2333	0
11	149.6	146.7	417.667	48.4333	317.8	177.8	0	34.9	0.8	0	218.9	0	2.36667	49.1333
12	129.667	0	347	199.133	0.2	1.2	143.367	235.867	516.733	84.9333	0	0	141.1	78.8333
13	378.2	162.067	478.9	1263.1	379.467	66.1333	0	1.1	20.3	469.134	607.833	0	0.6	0
14	0.366667	0	0.1	662.066	0	67.5667	1.4	278.733	254.467	0	48.5667	0	0.4	0
15	110.933	0	1.3	611.434	0	307.2	165.067	0.6	707.234	0.6	814.133	48.8667	0	0
16	335.767	137.033	511.1	47.4	82.2333	0	0	210.467	6.46667	524.867	12.2667	310.7	359.5	0
17	0	0	1.7	589.734	302.533	21.3	2.5	117	0.2	0	0	0	240.667	274
18	67.6667	176.533	15.5667	601.833	494.233	2.46667	0	165.533	668.833	207.533	0	15.3333	31.4667	19.1
19	183.8	123.767	190.567	175.2	246.333	16.7	20.2	14.5	234.633	113.267	150.033	0	71.8667	0
20	124.9	2.13333	40.3	169.233	281.1	63.3667	35.8667	69.6	359.567	165.2	53.9333	281.267	25.4333	149.4
21	409.333	90.7667	152.933	42.0667	134.033	10.4333	266.3	291.833	709.6	0	6.8	0	106.1	112.167
22	466.267	326.1	1116.3	245.567	276	353.8	429.467	666.3	60.6667	165.8	389.367	243.333	204.633	10.8667
23	1688.03	573.733	1477.27	230.4	932.967	128.9	676.633	834.933	1390.17	353.067	1130.3	729.2	449.634	1036.07
24	1647.57	1100.13	1592.6	1009.8	801.734	480.3	1279.63	913.533	1090.5	660.133	937.9	720.767	235.267	971.6
day 35
1	242.3	208.733	258.367	751.498	257.1	211.067	356.234	205.7	254.6	602.866	915.433	286.7	606.899	332.234
2	1008.4	822	932.9	469.066	360.233	509.367	620.167	219.4	421.733	225.4	549.567	329.733	345.1	279.267
3	396.233	717.133	301.433	639.233	105.733	11.7667	407.533	395.967	666.966	492.5	231.767	1098.4	508.433	434.7
4	110.6	371.5	289.167	358.333	57.1667	68.2667	1	71.2667	76.6667	7.86667	580.233	654.533	160.667	169.733
5	4.36667	1.83333	0	74.5667	48	0.433333	119.933	123.033	177.867	90.2	106.933	27.5333	150.4	42.0333
6	175.633	78.5	252.2	39.6333	109.5	131.2	194.367	19.4333	19	142.267	12.3667	332.967	128.767	314.267
7	689.267	666.967	202.3	230.233	119.7	340.3	471.6	186.333	270.833	492.067	687.267	266.933	141.1	512.9
8	194.467	122.567	228.3	376.9	243	158.7	196.6	51.4333	571.167	105.967	252.4	74.3	818.933	218.1
9	277.833	7.06667	308.033	160.633	77.9333	53.2333	56.1333	79.7333	33.4	19	80.3333	0.566667	30.8	0
10	38.0667	59.7333	260.733	3.3	174.167	12.7667	348.467	0.666667	82	111.8	14.4667	124.3	338.233	9.66667
11	358.6	340.967	0	10.8	0.2	181.667	6.16667	115.833	694.766	258.967	316.367	94.6333	28.0333	2.03333
12	0.5	12.9	522.533	25.8	431.967	28.6667	295.933	0	133.533	1	0	14.1	127.3	0
13	360.733	5.96667	61.9	623.167	0.2	124.567	252.8	60.3333	585.967	330.767	272.033	0	3.1	171.567
14	79.1	446.4	435.734	169.767	0	15	0.366667	0.333333	84.5667	0	10.2667	0	3.66667	208
15	3.1	0.866667	108.633	0	0.9	191.933	0	134.233	87.3	0	228.567	75.5	0	0
16	10.1	7.03333	571.167	2.86667	225.5	0	268.167	0	1915.47	0	273.933	399.467	47.4333	0
17	45.2333	12.4667	31.7333	362.733	18.5	355.199	1.8	7.6	747.467	0	33.7	6.9	416.2	37.5
18	10.0333	33.1333	21.1667	72.4333	14.2333	44.7667	14.8333	51.6333	18.1333	265.033	33.1	7.46667	18.6667	223.433
19	161.167	4	124.567	70.0667	140.033	79.3333	27.6	53.3333	169.833	167.733	24.2	58.1667	0.4	0
20	153.667	2.7	414.9	0	102.167	261.367	295.333	93.1333	1.4	8	6.83333	0	161.5	318.367
21	428.9	93.6	331.333	314.767	149.2	45.5333	11.7	182.333	71.5333	2.63333	47.6333	431.133	128.867	2.53333
22	480.5	551.767	707	328.933	839	1195.57	1280.97	696.134	735.5	228.5	857	950.333	581.667	1055.93
23	1144.43	1140.33	1478.2	690.3	2159.5	1784.06	1852.36	1402.03	1239.87	282.4	285	1149.3	781.1	1490.07
24	1064.27	1121.77	1286.37	1021.27	866.767	771.234	930.9	636.434	1574.53	902.767	1689	1104.2	712.567	1323.57
